# Supplementary material for: Short-time ozone treatment promotes protease-mediated destruction of B cell allergen epitopes by altering the structural characteristics of whey protein
Source: Royal Society of Chemistry journal article supplement (doi:10.1039/d4fo00754a), 2024-01-01
Supplement: d4fo00754a1.pdf [file d4fo00754a1.pdf]

**Short-Time Ozone Treatment Promotes Protease-Mediated Destruction of B Cell  
Allergen Epitopes by Altering the Structural Characteristics of Whey Protein**

Ziyi Xiong<sup>1,2,4</sup>, Hongkai Tan<sup>1,2,4</sup>, Yu Qiu<sup>1,2,4</sup>, Yong Wu<sup>2,3,4</sup>, Xuanyi Meng<sup>2,3,4</sup>,

Hongbing Chen<sup>2,3,4</sup>, Linsheng Wei<sup>5</sup>, Xin Li<sup>1,2,4\*</sup>

<sup>1</sup>State Key Laboratory of Food Science and Resources, Nanchang University,  
Nanchang, Jiangxi 330047, P.R. China

<sup>2</sup>School of Food Science and Technology, Nanchang University, Nanchang, Jiangxi  
330047, P.R. China

<sup>3</sup>Sino-German Joint Research Institute, Nanchang University, Nanchang, Jiangxi  
330047, P.R. China

<sup>4</sup>Jiangxi Province Key Laboratory of Food Allergy, Nanchang University, Nanchang,  
Jiangxi 330047, China

<sup>5</sup>School of Resources and Environment, Nanchang University, Nanchang, Jiangxi  
330031, China

\* Corresponding authors.

**Correspondence:**

Dr. Xin Li

State Key Laboratory of Food Science and Resources, Nanchang University,  
Nanchang 330047, P.R. China

Address: No. 235 Nanjing Donglu, Nanchang 330047, China

\* E-mail: zhizilixin@ncu.edu.cn

## **Content**

**Figure S1** Schematic diagram of ozone treatment. ①: Oxygen cylinder; ②: O<sub>3</sub> generator; ③: Gas flowmeter; ④: Gas disperser; ⑤: Whey protein solution.

**Table S1** Information about CMA patients.

**Table S2** Enzymatic hydrolysis conditions of whey protein.

**Table S3** Peptide mapping information of whey protein hydrolysate.

**Table S4** Peptide mapping information of hydrolysate of ozonated whey protein.

**Table S5** B-cell linear epitope database of ALA and BLG.

**Table S6** Epitope peptides contained in whey protein hydrolysate.

**Table S7** Epitope peptides contained in the hydrolysate of ozonated whey protein.

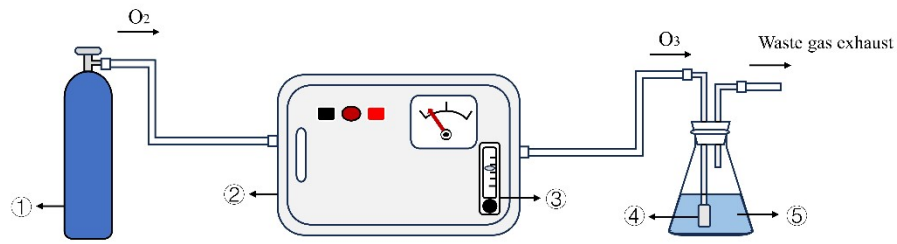

**Figure S1** Schematic diagram of ozone treatment. ①: Oxygen cylinder; ②:  $O_3$  generator; ③: Gas flowmeter; ④: Gas disperser; ⑤: Whey protein solution.

**Table S1 Information about CMA patients.**

| <b>Patient No.</b> | <b>Gender</b> | <b>Age (months)</b> | <b>Symptoms</b>            | <b>Specific IgE Level (IU/mL)</b> |
|--------------------|---------------|---------------------|----------------------------|-----------------------------------|
| 1                  | F             | 48                  | Allergic rhinitis          | 3.2                               |
| 2                  | M             | 9                   | Serum urticaria            | 56.8                              |
| 3                  | M             | 1                   | Asthmatic bronchitis       | 2.9                               |
| 4                  | M             | 36                  | Allergic rhinitis          | 3.7                               |
| 5                  | M             | 12                  | Leukocytosis               | 43.7                              |
| 6                  | F             | 10                  | Asthmatic bronchopneumonia | 3.5                               |
| 7                  | M             | 4                   | Urticaria                  | 5.9                               |
| 8                  | F             | 13                  | pneumonia                  | 1.0                               |
| 9                  | M             | 4                   | ND*                        | 2.7                               |
| 10                 | M             | 11                  | ND*                        | 1.8                               |

M means male.

F means female.

ND\* means Not Done.

**Table S2** Enzymatic hydrolysis conditions of whey protein.

| Condition parameter | Level |    |     |    |     |
|---------------------|-------|----|-----|----|-----|
| pH                  | 8     | 9  | 10  | 11 | 12  |
| t (h)               | 0.5   | 1  | 1.5 | 2  | 2.5 |
| E/S (%)             | 1.5   | 2  | 2.5 | 3  | 3.5 |
| T (°C)              | 40    | 45 | 50  | 55 | 60  |

**Table S3:** Peptide mapping information of whey protein hydrolysate.

| Sequence | Length | Mass     | Leading razor protein                   | Start position | End position | Score  | Intensity   |
|----------|--------|----------|-----------------------------------------|----------------|--------------|--------|-------------|
| NNDSTEY  | 7      | 841.309  | sp P00711 LALBA_BOVINAAlpha-lactalbumin | 63             | 69           | 197.16 | 3616900000  |
| DTDYKKY  | 7      | 931.4287 | sp P02754 LACB_BOVINBeta-lactoglobulin  | 112            | 118          | 171.08 | 2117800000  |
| LIVTQ    | 5      | 572.3534 | sp P02754 LACB_BOVINBeta-lactoglobulin  | 17             | 21           | 161.77 | 4068700000  |
| EVFREL   | 6      | 791.4178 | sp P00711 LALBA_BOVINAAlpha-lactalbumin | 26             | 31           | 155.73 | 4764200000  |
| GYDTQ    | 5      | 582.2286 | sp P00711 LALBA_BOVINAAlpha-lactalbumin | 54             | 58           | 154.44 | 1418000000  |
| LKDLKGY  | 7      | 835.4804 | sp P00711 LALBA_BOVINAAlpha-lactalbumin | 31             | 37           | 154.01 | 861480000   |
| TWYSL    | 5      | 668.317  | sp P02754 LACB_BOVINBeta-lactoglobulin  | 34             | 38           | 153.57 | 605900000   |
| LSFNPT   | 6      | 677.3384 | sp P02754 LACB_BOVINBeta-lactoglobulin  | 165            | 170          | 150.06 | 10292000    |
| KIDAL    | 5      | 558.3377 | sp P02754 LACB_BOVINBeta-lactoglobulin  | 99             | 103          | 150    | 6403100000  |
| KFDKALK  | 7      | 848.512  | sp P02754 LACB_BOVINBeta-lactoglobulin  | 151            | 157          | 149.4  | 4774800000  |
| LIVTQT   | 6      | 673.401  | sp P02754 LACB_BOVINBeta-lactoglobulin  | 17             | 22           | 144.29 | 105140000   |
| KDLKGY   | 6      | 722.3963 | sp P00711 LALBA_BOVINAAlpha-lactalbumin | 32             | 37           | 143.97 | 27253000000 |
| DTDYK    | 5      | 640.2704 | sp P02754 LACB_BOVINBeta-lactoglobulin  | 112            | 116          | 143.88 | 556520000   |
| KIIAEKT  | 7      | 801.496  | sp P02754 LACB_BOVINBeta-lactoglobulin  | 86             | 92           | 143.61 | 76384000    |
| EYGLF    | 5      | 627.2904 | sp P00711 LALBA_BOVINAAlpha-lactalbumin | 68             | 72           | 143.11 | 840650000   |
| DKVGIN   | 6      | 644.3493 | sp P00711 LALBA_BOVINAAlpha-lactalbumin | 116            | 121          | 137.59 | 12518000000 |
| DKVGINY  | 7      | 807.4127 | sp P00711 LALBA_BOVINAAlpha-lactalbumin | 116            | 122          | 135.87 | 3804900000  |
| KILDK    | 5      | 615.3956 | sp P00711 LALBA_BOVINAAlpha-lactalbumin | 113            | 117          | 135.25 | 168900000   |
| KTKIPAV  | 7      | 755.4905 | sp P02754 LACB_BOVINBeta-lactoglobulin  | 91             | 97           | 132.53 | 36645000    |
| KKIIAE   | 6      | 700.4483 | sp P02754 LACB_BOVINBeta-lactoglobulin  | 85             | 90           | 130.84 | 1089600000  |
| TDYKKY   | 6      | 816.4018 | sp P02754 LACB_BOVINBeta-lactoglobulin  | 113            | 118          | 130.84 | 428200000   |

|        |   |          |                        |                    |     |     |        |             |
|--------|---|----------|------------------------|--------------------|-----|-----|--------|-------------|
| KILDKV | 6 | 714.464  | sp P00711 LALBA_BOVINA | Alpha-lactalbumin  | 113 | 118 | 130.05 | 1856500000  |
| FDKALK | 6 | 720.417  | sp P02754 LACB_BOVIN   | Beta-lactoglobulin | 152 | 157 | 129.96 | 463030000   |
| VAGTWY | 6 | 695.3279 | sp P02754 LACB_BOVIN   | Beta-lactoglobulin | 31  | 36  | 128.65 | 1193300000  |
| VLDTD  | 5 | 561.2646 | sp P02754 LACB_BOVIN   | Beta-lactoglobulin | 110 | 114 | 127.53 | 67008000    |
| INNKIW | 6 | 786.4388 | sp P00711 LALBA_BOVINA | Alpha-lactalbumin  | 74  | 79  | 126.38 | 293740000   |
| VFREL  | 5 | 662.3752 | sp P00711 LALBA_BOVINA | Alpha-lactalbumin  | 27  | 31  | 123.53 | 4010500000  |
| VDDEAL | 6 | 660.2966 | sp P02754 LACB_BOVIN   | Beta-lactoglobulin | 144 | 149 | 123.4  | 348680000   |
| QAIVQ  | 5 | 557.3173 | sp P00711 LALBA_BOVINA | Alpha-lactalbumin  | 58  | 62  | 123.06 | 572290000   |
| IVTQ   | 4 | 459.2693 | sp P02754 LACB_BOVIN   | Beta-lactoglobulin | 18  | 21  | 121.92 | 6775700000  |
| NENKVL | 6 | 715.3865 | sp P02754 LACB_BOVIN   | Beta-lactoglobulin | 104 | 109 | 120.9  | 17731000000 |
| VAGTW  | 5 | 532.2646 | sp P02754 LACB_BOVIN   | Beta-lactoglobulin | 31  | 35  | 120    | 2859800000  |
| VGINY  | 5 | 564.2908 | sp P00711 LALBA_BOVINA | Alpha-lactalbumin  | 118 | 122 | 120    | 492780000   |
| FQIN   | 4 | 520.2646 | sp P00711 LALBA_BOVINA | Alpha-lactalbumin  | 72  | 75  | 119.89 | 254210000   |
| EQLTK  | 5 | 617.3384 | sp P00711 LALBA_BOVINA | Alpha-lactalbumin  | 20  | 24  | 119.22 | 3688300000  |
| DIQKVA | 6 | 672.3806 | sp P02754 LACB_BOVIN   | Beta-lactoglobulin | 27  | 32  | 117.56 | 14842000000 |
| AIVQN  | 5 | 543.3017 | sp P00711 LALBA_BOVINA | Alpha-lactalbumin  | 59  | 63  | 115.97 | 6976100000  |
| PLRVY  | 5 | 646.3803 | sp P02754 LACB_BOVIN   | Beta-lactoglobulin | 54  | 58  | 115.03 | 372750000   |
| DSTEY  | 5 | 613.2231 | sp P00711 LALBA_BOVINA | Alpha-lactalbumin  | 65  | 69  | 114.73 | 117580000   |
| QTMKGL | 6 | 676.3578 | sp P02754 LACB_BOVIN   | Beta-lactoglobulin | 21  | 26  | 114.02 | 2141700000  |
| KIPAVF | 6 | 673.4163 | sp P02754 LACB_BOVIN   | Beta-lactoglobulin | 93  | 98  | 113.63 | 33554000000 |
| KTKIPA | 6 | 656.4221 | sp P02754 LACB_BOVIN   | Beta-lactoglobulin | 91  | 96  | 113.08 | 1603100000  |
| PEQSL  | 5 | 572.2806 | sp P02754 LACB_BOVIN   | Beta-lactoglobulin | 129 | 133 | 113.07 | 38776000    |
| KPTPE  | 5 | 570.3013 | sp P02754 LACB_BOVIN   | Beta-lactoglobulin | 63  | 67  | 112.88 | 14180000    |
| YWLAH  | 5 | 688.3333 | sp P00711 LALBA_BOVINA | Alpha-lactalbumin  | 122 | 126 | 111.84 | 35404000000 |
| KALPMH | 6 | 695.3789 | sp P02754 LACB_BOVIN   | Beta-lactoglobulin | 157 | 162 | 110.43 | 48095000    |

|         |   |          |                                         |     |     |        |             |
|---------|---|----------|-----------------------------------------|-----|-----|--------|-------------|
| AMAAS   | 5 | 449.1944 | sp P02754 LACB_BOVINBeta-lactoglobulin  | 39  | 43  | 110.2  | 134740000   |
| DISLL   | 5 | 559.3217 | sp P02754 LACB_BOVINBeta-lactoglobulin  | 44  | 48  | 110.2  | 158150000   |
| YGLFQ   | 5 | 626.3064 | sp P00711 LALBA_BOVINAAlpha-lactalbumin | 69  | 73  | 110.2  | 3510800000  |
| VYVE    | 4 | 508.2533 | sp P02754 LACB_BOVINBeta-lactoglobulin  | 57  | 60  | 109.97 | 209260000   |
| SFNPT   | 5 | 564.2544 | sp P02754 LACB_BOVINBeta-lactoglobulin  | 166 | 170 | 109.94 | 15899000000 |
| QKVAGT  | 6 | 602.3388 | sp P02754 LACB_BOVINBeta-lactoglobulin  | 29  | 34  | 109.8  | 160260000   |
| GLFQIN  | 6 | 690.3701 | sp P00711 LALBA_BOVINAAlpha-lactalbumin | 70  | 75  | 109.6  | 3886400000  |
| QLTK    | 4 | 488.2959 | sp P00711 LALBA_BOVINAAlpha-lactalbumin | 21  | 24  | 109.53 | 34257000    |
| GDLEIL  | 6 | 658.3538 | sp P02754 LACB_BOVINBeta-lactoglobulin  | 68  | 73  | 109.15 | 8218900000  |
| KIIAE   | 5 | 572.3534 | sp P02754 LACB_BOVINBeta-lactoglobulin  | 86  | 90  | 108.69 | 2762800000  |
| AEPEQSL | 7 | 772.3603 | sp P02754 LACB_BOVINBeta-lactoglobulin  | 127 | 133 | 107.74 | 333230000   |
| IIAEKT  | 6 | 673.401  | sp P02754 LACB_BOVINBeta-lactoglobulin  | 87  | 92  | 107.65 | 2472400000  |
| GTWYSL  | 6 | 725.3384 | sp P02754 LACB_BOVINBeta-lactoglobulin  | 33  | 38  | 107.15 | 6338500000  |
| HIRLS   | 5 | 624.3707 | sp P02754 LACB_BOVINBeta-lactoglobulin  | 162 | 166 | 107.15 | 19695000000 |
| LQKWE   | 5 | 702.3701 | sp P02754 LACB_BOVINBeta-lactoglobulin  | 74  | 78  | 107.15 | 9149800000  |
| GDLE    | 4 | 432.1856 | sp P02754 LACB_BOVINBeta-lactoglobulin  | 68  | 71  | 105.36 | 267310000   |
| TKIPAVF | 7 | 774.464  | sp P02754 LACB_BOVINBeta-lactoglobulin  | 92  | 98  | 105.2  | 14700000000 |
| LSFN    | 4 | 479.238  | sp P02754 LACB_BOVINBeta-lactoglobulin  | 165 | 168 | 104.62 | 32719000    |
| LQKW    | 4 | 573.3275 | sp P02754 LACB_BOVINBeta-lactoglobulin  | 74  | 77  | 104.58 | 1261300000  |
| IPAVF   | 5 | 545.3213 | sp P02754 LACB_BOVINBeta-lactoglobulin  | 94  | 98  | 104.08 | 144810000   |
| VTQ     | 3 | 346.1852 | sp P02754 LACB_BOVINBeta-lactoglobulin  | 19  | 21  | 104.08 | 84683000    |
| DYKKYL  | 6 | 828.4382 | sp P02754 LACB_BOVINBeta-lactoglobulin  | 114 | 119 | 103.28 | 135520000   |
| DAQSAPL | 7 | 700.3392 | sp P02754 LACB_BOVINBeta-lactoglobulin  | 49  | 55  | 102.8  | 14770000000 |
| AIVQ    | 4 | 429.2587 | sp P00711 LALBA_BOVINAAlpha-lactalbumin | 59  | 62  | 102.45 | 28490000000 |
| ISLL    | 4 | 444.2948 | sp P02754 LACB_BOVINBeta-lactoglobulin  | 45  | 48  | 102.45 | 7724800000  |



|         |   |          |                                         |     |     |        |             |
|---------|---|----------|-----------------------------------------|-----|-----|--------|-------------|
| LIVT    | 4 | 444.2948 | sp P02754 LACB_BOVINBeta-lactoglobulin  | 17  | 20  | 102.45 | 19099000000 |
| LEEQ    | 4 | 517.2384 | sp P02754 LACB_BOVINBeta-lactoglobulin  | 172 | 175 | 102.4  | 108970000   |
| TFHTS   | 5 | 591.2653 | sp P00711 LALBA_BOVINAAlpha-lactalbumin | 49  | 53  | 102.29 | 3268100000  |
| DISLLD  | 6 | 674.3487 | sp P02754 LACB_BOVINBeta-lactoglobulin  | 44  | 49  | 102.12 | 233660000   |
| KFDKAL  | 6 | 720.417  | sp P02754 LACB_BOVINBeta-lactoglobulin  | 151 | 156 | 101.72 | 4613400000  |
| KGLDIQ  | 6 | 672.3806 | sp P02754 LACB_BOVINBeta-lactoglobulin  | 24  | 29  | 101.69 | 400070000   |
| LDKVGIN | 7 | 757.4334 | sp P00711 LALBA_BOVINAAlpha-lactalbumin | 115 | 121 | 101.41 | 151770000   |
| LNENKVL | 7 | 828.4705 | sp P02754 LACB_BOVINBeta-lactoglobulin  | 103 | 109 | 101.28 | 1067800000  |
| DISL    | 4 | 446.2377 | sp P02754 LACB_BOVINBeta-lactoglobulin  | 44  | 47  | 100.21 | 973500000   |
| FNPT    | 4 | 477.2224 | sp P02754 LACB_BOVINBeta-lactoglobulin  | 167 | 170 | 100.09 | 7415300000  |
| QSAPL   | 5 | 514.2751 | sp P02754 LACB_BOVINBeta-lactoglobulin  | 51  | 55  | 100.04 | 73926000    |
| LVRTPE  | 6 | 713.4072 | sp P02754 LACB_BOVINBeta-lactoglobulin  | 138 | 143 | 99.919 | 3373800000  |
| EQLT    | 4 | 489.2435 | sp P00711 LALBA_BOVINAAlpha-lactalbumin | 20  | 23  | 99.626 | 179760000   |
| EVFRE   | 5 | 678.3337 | sp P00711 LALBA_BOVINAAlpha-lactalbumin | 26  | 30  | 99.511 | 1905600000  |
| DYKKY   | 5 | 715.3541 | sp P02754 LACB_BOVINBeta-lactoglobulin  | 114 | 118 | 99.228 | 139920000   |
| RELKDL  | 6 | 772.4443 | sp P00711 LALBA_BOVINAAlpha-lactalbumin | 29  | 34  | 98.415 | 2864200000  |
| DKALKAL | 7 | 757.4698 | sp P02754 LACB_BOVINBeta-lactoglobulin  | 153 | 159 | 97.033 | 75131000    |
| KKYLLF  | 6 | 810.5004 | sp P02754 LACB_BOVINBeta-lactoglobulin  | 116 | 121 | 96.839 | 26636000    |
| DEALE   | 5 | 575.2439 | sp P02754 LACB_BOVINBeta-lactoglobulin  | 146 | 150 | 96.372 | 72077000    |
| YWLAHK  | 6 | 816.4283 | sp P00711 LALBA_BOVINAAlpha-lactalbumin | 122 | 127 | 96.337 | 7033400000  |
| ALNE    | 4 | 445.2173 | sp P02754 LACB_BOVINBeta-lactoglobulin  | 102 | 105 | 95.117 | 994930000   |
| FHTS    | 4 | 490.2176 | sp P00711 LALBA_BOVINAAlpha-lactalbumin | 50  | 53  | 94.737 | 893860000   |
| ILLQ    | 4 | 485.3213 | sp P02754 LACB_BOVINBeta-lactoglobulin  | 72  | 75  | 94.737 | 8224400000  |
| EALE    | 4 | 460.2169 | sp P02754 LACB_BOVINBeta-lactoglobulin  | 147 | 150 | 94.533 | 78021000    |
| IRLS    | 4 | 487.3118 | sp P02754 LACB_BOVINBeta-lactoglobulin  | 163 | 166 | 94.268 | 150480000   |

|         |   |          |                                         |     |     |        |            |
|---------|---|----------|-----------------------------------------|-----|-----|--------|------------|
| HIRL    | 4 | 537.3387 | sp P02754 LACB_BOVINBeta-lactoglobulin  | 162 | 165 | 94.118 | 988510000  |
| WYSL    | 4 | 567.2693 | sp P02754 LACB_BOVINBeta-lactoglobulin  | 35  | 38  | 94.118 | 2573700000 |
| FNPTQLE | 7 | 847.4076 | sp P02754 LACB_BOVINBeta-lactoglobulin  | 167 | 173 | 94.006 | 42222000   |
| GLDIQ   | 5 | 544.2857 | sp P02754 LACB_BOVINBeta-lactoglobulin  | 25  | 29  | 93.763 | 908980000  |
| LTDDIM  | 6 | 706.3207 | sp P00711 LALBA_BOVINAAlpha-lactalbumin | 104 | 109 | 93.595 | 104460000  |
| PMHIRL  | 6 | 765.432  | sp P02754 LACB_BOVINBeta-lactoglobulin  | 160 | 165 | 93.595 | 14909000   |
| QLEE    | 4 | 517.2384 | sp P02754 LACB_BOVINBeta-lactoglobulin  | 171 | 174 | 93.045 | 1914500000 |
| QINNKIW | 7 | 914.4974 | sp P00711 LALBA_BOVINAAlpha-lactalbumin | 73  | 79  | 92.785 | 1076000000 |
| WLAHKAL | 7 | 837.4861 | sp P00711 LALBA_BOVINAAlpha-lactalbumin | 123 | 129 | 92.785 | 123810000  |
| PMHIR   | 5 | 652.3479 | sp P02754 LACB_BOVINBeta-lactoglobulin  | 160 | 164 | 92.151 | 393990000  |
| VEELKPT | 7 | 814.4436 | sp P02754 LACB_BOVINBeta-lactoglobulin  | 59  | 65  | 91.906 | 29399000   |
| LAHKAL  | 6 | 651.4068 | sp P00711 LALBA_BOVINAAlpha-lactalbumin | 124 | 129 | 90.631 | 1675600000 |
| KVGIN   | 5 | 529.3224 | sp P00711 LALBA_BOVINAAlpha-lactalbumin | 117 | 121 | 89.847 | 176800000  |
| LKALPM  | 6 | 671.404  | sp P02754 LACB_BOVINBeta-lactoglobulin  | 156 | 161 | 89.775 | 9649500000 |
| TMKGL   | 5 | 548.2992 | sp P02754 LACB_BOVINBeta-lactoglobulin  | 22  | 26  | 89.775 | 3291000000 |
| ALKALPM | 7 | 742.4411 | sp P02754 LACB_BOVINBeta-lactoglobulin  | 155 | 161 | 88.627 | 4954900000 |
| DLKGY   | 5 | 594.3013 | sp P00711 LALBA_BOVINAAlpha-lactalbumin | 33  | 37  | 88.626 | 1627800000 |
| LRVY    | 4 | 549.3275 | sp P02754 LACB_BOVINBeta-lactoglobulin  | 55  | 58  | 88.444 | 2659400000 |
| DQWL    | 4 | 560.2595 | sp P00711 LALBA_BOVINAAlpha-lactalbumin | 135 | 138 | 87.945 | 1303700000 |
| GLDIQK  | 6 | 672.3806 | sp P02754 LACB_BOVINBeta-lactoglobulin  | 25  | 30  | 87.582 | 539450000  |
| FREL    | 4 | 563.3068 | sp P00711 LALBA_BOVINAAlpha-lactalbumin | 28  | 31  | 87.265 | 2430700000 |
| LDIQ    | 4 | 487.2642 | sp P02754 LACB_BOVINBeta-lactoglobulin  | 26  | 29  | 87.265 | 154900000  |
| VLDTDYK | 7 | 852.4229 | sp P02754 LACB_BOVINBeta-lactoglobulin  | 110 | 116 | 86.866 | 2271600000 |
| DYKKYLL | 7 | 941.5222 | sp P02754 LACB_BOVINBeta-lactoglobulin  | 114 | 120 | 86.838 | 26135000   |
| LIVTQTM | 7 | 804.4415 | sp P02754 LACB_BOVINBeta-lactoglobulin  | 17  | 23  | 86.838 | 77702000   |

|         |   |          |                                         |     |     |        |             |
|---------|---|----------|-----------------------------------------|-----|-----|--------|-------------|
| LLDAQ   | 5 | 558.3013 | sp P02754 LACB_BOVINBeta-lactoglobulin  | 47  | 51  | 86.344 | 49575000    |
| LKPTPE  | 6 | 683.3854 | sp P02754 LACB_BOVINBeta-lactoglobulin  | 62  | 67  | 86.121 | 929360000   |
| YKKYLL  | 6 | 826.4953 | sp P02754 LACB_BOVINBeta-lactoglobulin  | 115 | 120 | 85.909 | 126610000   |
| LKPTPEG | 7 | 740.4069 | sp P02754 LACB_BOVINBeta-lactoglobulin  | 62  | 68  | 85.89  | 18015000    |
| LDQW    | 4 | 560.2595 | sp P00711 LALBA_BOVINAAlpha-lactalbumin | 134 | 137 | 85.518 | 36179000    |
| ELKPTPE | 7 | 812.428  | sp P02754 LACB_BOVINBeta-lactoglobulin  | 61  | 67  | 85.359 | 554000000   |
| KVAGTWY | 7 | 823.4228 | sp P02754 LACB_BOVINBeta-lactoglobulin  | 30  | 36  | 85.357 | 90914000    |
| STEY    | 4 | 498.1962 | sp P00711 LALBA_BOVINAAlpha-lactalbumin | 66  | 69  | 84.485 | 44817000    |
| ALE     | 3 | 331.1743 | sp P02754 LACB_BOVINBeta-lactoglobulin  | 148 | 150 | 83.876 | 2394000000  |
| ALPM    | 4 | 430.225  | sp P02754 LACB_BOVINBeta-lactoglobulin  | 158 | 161 | 83.876 | 17760000000 |
| IVQ     | 3 | 358.2216 | sp P00711 LALBA_BOVINAAlpha-lactalbumin | 60  | 62  | 83.876 | 399980000   |
| LLAL    | 4 | 428.2999 | sp P02754 LACB_BOVINBeta-lactoglobulin  | 5   | 8   | 83.876 | 352970000   |
| PAVF    | 4 | 432.2373 | sp P02754 LACB_BOVINBeta-lactoglobulin  | 95  | 98  | 83.876 | 153840000   |
| VLVL    | 4 | 442.3155 | sp P02754 LACB_BOVINBeta-lactoglobulin  | 108 | 111 | 83.876 | 969600000   |
| GYGGV   | 5 | 451.2067 | sp P00711 LALBA_BOVINAAlpha-lactalbumin | 36  | 40  | 83.661 | 27183000    |
| RVYVEE  | 6 | 793.397  | sp P02754 LACB_BOVINBeta-lactoglobulin  | 56  | 61  | 83.229 | 223600000   |
| VGIN    | 4 | 401.2274 | sp P00711 LALBA_BOVINAAlpha-lactalbumin | 118 | 121 | 82.602 | 280710000   |
| YSLA    | 4 | 452.2271 | sp P02754 LACB_BOVINBeta-lactoglobulin  | 36  | 39  | 82.602 | 7338500000  |
| KVAGT   | 5 | 474.2802 | sp P02754 LACB_BOVINBeta-lactoglobulin  | 30  | 34  | 82.141 | 42730000    |
| SDISLL  | 6 | 646.3538 | sp P02754 LACB_BOVINBeta-lactoglobulin  | 43  | 48  | 80.498 | 19997000    |
| IVTQT   | 5 | 560.317  | sp P02754 LACB_BOVINBeta-lactoglobulin  | 18  | 22  | 80.317 | 94714000    |
| EKFDKA  | 6 | 736.3756 | sp P02754 LACB_BOVINBeta-lactoglobulin  | 150 | 155 | 79.469 | 19562000    |
| TTFHTS  | 6 | 692.313  | sp P00711 LALBA_BOVINAAlpha-lactalbumin | 48  | 53  | 78.166 | 380010000   |
| AHKAL   | 5 | 538.3227 | sp P00711 LALBA_BOVINAAlpha-lactalbumin | 125 | 129 | 77.925 | 122440000   |
| LDTDYK  | 6 | 753.3545 | sp P02754 LACB_BOVINBeta-lactoglobulin  | 111 | 116 | 77.748 | 62388000    |

|         |   |          |                                         |     |     |        |             |
|---------|---|----------|-----------------------------------------|-----|-----|--------|-------------|
| KFDKA   | 5 | 607.333  | sp P02754 LACB_BOVINBeta-lactoglobulin  | 151 | 155 | 77.72  | 469010000   |
| ALIVT   | 5 | 515.3319 | sp P02754 LACB_BOVINBeta-lactoglobulin  | 16  | 20  | 77.448 | 179410000   |
| KALPM   | 5 | 558.32   | sp P02754 LACB_BOVINBeta-lactoglobulin  | 157 | 161 | 77.448 | 16057000000 |
| LLQKW   | 5 | 686.4116 | sp P02754 LACB_BOVINBeta-lactoglobulin  | 73  | 77  | 77.448 | 526150000   |
| QSLA    | 4 | 417.2224 | sp P02754 LACB_BOVINBeta-lactoglobulin  | 131 | 134 | 77.448 | 259660000   |
| EEQCHI  | 6 | 757.3065 | sp P02754 LACB_BOVINBeta-lactoglobulin  | 173 | 178 | 76.553 | 17742000    |
| LPMHIR  | 6 | 765.432  | sp P02754 LACB_BOVINBeta-lactoglobulin  | 159 | 164 | 76.553 | 68524000    |
| QAIVQN  | 6 | 671.3602 | sp P00711 LALBA_BOVINAAlpha-lactalbumin | 58  | 63  | 76.347 | 17011000    |
| GYDT    | 4 | 454.17   | sp P00711 LALBA_BOVINAAlpha-lactalbumin | 54  | 57  | 75.898 | 78139000    |
| DIQKV   | 5 | 601.3435 | sp P02754 LACB_BOVINBeta-lactoglobulin  | 27  | 31  | 75.682 | 123830000   |
| IIAEK   | 5 | 572.3534 | sp P02754 LACB_BOVINBeta-lactoglobulin  | 87  | 91  | 74.849 | 981270000   |
| NYWLAH  | 6 | 802.3762 | sp P00711 LALBA_BOVINAAlpha-lactalbumin | 121 | 126 | 73.289 | 49082000    |
| EVFRELK | 7 | 919.5127 | sp P00711 LALBA_BOVINAAlpha-lactalbumin | 26  | 32  | 72.875 | 20027000    |
| KGYGCV  | 6 | 579.3017 | sp P00711 LALBA_BOVINAAlpha-lactalbumin | 35  | 40  | 72.338 | 165350000   |
| LQKWEN  | 6 | 816.413  | sp P02754 LACB_BOVINBeta-lactoglobulin  | 74  | 79  | 72.021 | 64048000    |
| ALEKF   | 5 | 606.3377 | sp P02754 LACB_BOVINBeta-lactoglobulin  | 148 | 152 | 71.995 | 8186300     |
| TQTMKGL | 7 | 777.4055 | sp P02754 LACB_BOVINBeta-lactoglobulin  | 20  | 26  | 71.949 | 15312000    |
| IVTQTMK | 7 | 819.4524 | sp P02754 LACB_BOVINBeta-lactoglobulin  | 18  | 24  | 71.852 | 37728000    |
| WLAHK   | 5 | 653.3649 | sp P00711 LALBA_BOVINAAlpha-lactalbumin | 123 | 127 | 71.753 | 50388000    |
| RVYVE   | 5 | 664.3544 | sp P02754 LACB_BOVINBeta-lactoglobulin  | 56  | 60  | 71.475 | 309060000   |
| YKKYL   | 5 | 713.4112 | sp P02754 LACB_BOVINBeta-lactoglobulin  | 115 | 119 | 71.475 | 34287000    |
| KVLVL   | 5 | 570.4105 | sp P02754 LACB_BOVINBeta-lactoglobulin  | 107 | 111 | 69.776 | 44520000    |
| KWENGE  | 6 | 761.3344 | sp P02754 LACB_BOVINBeta-lactoglobulin  | 76  | 81  | 69.432 | 766470000   |
| QKKIIAE | 7 | 828.5069 | sp P02754 LACB_BOVINBeta-lactoglobulin  | 84  | 90  | 69.383 | 303900000   |
| EKFDKAL | 7 | 849.4596 | sp P02754 LACB_BOVINBeta-lactoglobulin  | 150 | 156 | 69.176 | 126650000   |

|                   |    |          |                                         |     |     |        |             |
|-------------------|----|----------|-----------------------------------------|-----|-----|--------|-------------|
| AQSAPL            | 6  | 585.3122 | sp P02754 LACB_BOVINBeta-lactoglobulin  | 50  | 55  | 69.093 | 118480000   |
| KLDQW             | 5  | 688.3544 | sp P00711 LALBA_BOVINAAlpha-lactalbumin | 133 | 137 | 69.093 | 1325800000  |
| VDDEALE           | 7  | 789.3392 | sp P02754 LACB_BOVINBeta-lactoglobulin  | 144 | 150 | 68.485 | 2683100000  |
| YWLAHKA           | 7  | 887.4654 | sp P00711 LALBA_BOVINAAlpha-lactalbumin | 122 | 128 | 68.033 | 793860000   |
| ASDISLL           | 7  | 717.3909 | sp P02754 LACB_BOVINBeta-lactoglobulin  | 42  | 48  | 67.76  | 80333000    |
| KVAGTW            | 6  | 660.3595 | sp P02754 LACB_BOVINBeta-lactoglobulin  | 30  | 35  | 67.76  | 2666200000  |
| KLDQWL            | 6  | 801.4385 | sp P00711 LALBA_BOVINAAlpha-lactalbumin | 133 | 138 | 67.285 | 242480000   |
| LLQKWE            | 6  | 815.4541 | sp P02754 LACB_BOVINBeta-lactoglobulin  | 73  | 78  | 66.994 | 68285000    |
| MHIRLS            | 6  | 755.4112 | sp P02754 LACB_BOVINBeta-lactoglobulin  | 161 | 166 | 66.994 | 504490000   |
| MHIRL             | 5  | 668.3792 | sp P02754 LACB_BOVINBeta-lactoglobulin  | 161 | 165 | 66.538 | 206640000   |
| DIQKVAG           | 7  | 729.4021 | sp P02754 LACB_BOVINBeta-lactoglobulin  | 27  | 33  | 65.263 | 106050000   |
| DDEALEK           | 7  | 818.3658 | sp P02754 LACB_BOVINBeta-lactoglobulin  | 145 | 151 | 65.246 | 5077200     |
| ALKAL             | 5  | 514.3479 | sp P02754 LACB_BOVINBeta-lactoglobulin  | 155 | 159 | 63.055 | 20733000    |
| ALPMHIR           | 7  | 836.4691 | sp P02754 LACB_BOVINBeta-lactoglobulin  | 158 | 164 | 62.978 | 873850000   |
| DTQAIVQ           | 7  | 773.3919 | sp P00711 LALBA_BOVINAAlpha-lactalbumin | 56  | 62  | 62.715 | 20531000    |
| GTWYS             | 5  | 612.2544 | sp P02754 LACB_BOVINBeta-lactoglobulin  | 33  | 37  | 58.256 | 424580000   |
| IIAEKTk           | 7  | 801.496  | sp P02754 LACB_BOVINBeta-lactoglobulin  | 87  | 93  | 54.205 | 20008000    |
| KILDKVGINYWLAH    | 14 | 1668.935 | sp P00711 LALBA_BOVINAAlpha-lactalbumin | 113 | 126 | 277.28 | 1458100000  |
| NSAEPEQSL         | 9  | 973.4353 | sp P02754 LACB_BOVINBeta-lactoglobulin  | 125 | 133 | 256.48 | 5850900000  |
| QAIVQNNDSTEYGLF   | 15 | 1697.79  | sp P00711 LALBA_BOVINAAlpha-lactalbumin | 58  | 72  | 222    | 56403000    |
| AIVQNNDSTEYGLF    | 14 | 1569.731 | sp P00711 LALBA_BOVINAAlpha-lactalbumin | 59  | 72  | 218.48 | 10746000000 |
| VEELKPTPEGDLE     | 13 | 1454.714 | sp P02754 LACB_BOVINBeta-lactoglobulin  | 59  | 71  | 214.26 | 23163000000 |
| AIVQNNDSTE        | 10 | 1089.494 | sp P00711 LALBA_BOVINAAlpha-lactalbumin | 59  | 68  | 213.53 | 6175800000  |
| EVFRELKDLKGY      | 12 | 1495.804 | sp P00711 LALBA_BOVINAAlpha-lactalbumin | 26  | 37  | 210.93 | 2092000000  |
| ASDISLLDAQSAPLRVY | 17 | 1817.952 | sp P02754 LACB_BOVINBeta-lactoglobulin  | 42  | 58  | 202.44 | 25451000    |

|                 |    |          |                                         |     |     |        |            |
|-----------------|----|----------|-----------------------------------------|-----|-----|--------|------------|
| LVRTPEVDDE      | 10 | 1171.572 | sp P02754 LACB_BOVINBeta-lactoglobulin  | 138 | 147 | 199.89 | 2335800000 |
| AIVQNNDSTEY     | 11 | 1252.557 | sp P00711 LALBA_BOVINAAlpha-lactalbumin | 59  | 69  | 195.57 | 6101300000 |
| AIVQNNDSTEYGLFQ | 15 | 1697.79  | sp P00711 LALBA_BOVINAAlpha-lactalbumin | 59  | 73  | 195.51 | 313370000  |
| KILDKVGIN       | 9  | 998.6124 | sp P00711 LALBA_BOVINAAlpha-lactalbumin | 113 | 121 | 191.85 | 5842000000 |
| KILDKVGINY      | 10 | 1161.676 | sp P00711 LALBA_BOVINAAlpha-lactalbumin | 113 | 122 | 191.67 | 964500000  |
| ELKPTPEGDLE     | 11 | 1226.603 | sp P02754 LACB_BOVINBeta-lactoglobulin  | 61  | 71  | 190.88 | 2092200000 |
| KIIAEKTKIPAVF   | 13 | 1456.902 | sp P02754 LACB_BOVINBeta-lactoglobulin  | 86  | 98  | 190.53 | 3957700000 |
| VEELKPTPEGDLEIL | 15 | 1680.882 | sp P02754 LACB_BOVINBeta-lactoglobulin  | 59  | 73  | 184.24 | 3964000000 |
| HIRLSFNPTQLEEQ  | 14 | 1710.869 | sp P02754 LACB_BOVINBeta-lactoglobulin  | 162 | 175 | 182.23 | 215930000  |
| ELKPTPEGDLEIL   | 13 | 1452.771 | sp P02754 LACB_BOVINBeta-lactoglobulin  | 61  | 73  | 179.42 | 4469000000 |
| VEELKPTPEGDLEI  | 14 | 1567.798 | sp P02754 LACB_BOVINBeta-lactoglobulin  | 59  | 72  | 174.42 | 353690000  |
| DAQSAPLRVY      | 10 | 1118.572 | sp P02754 LACB_BOVINBeta-lactoglobulin  | 49  | 58  | 172.21 | 906680000  |
| KIDALNENKVLVL   | 13 | 1467.866 | sp P02754 LACB_BOVINBeta-lactoglobulin  | 99  | 111 | 172    | 315190000  |
| LKPTPEGDLE      | 10 | 1097.561 | sp P02754 LACB_BOVINBeta-lactoglobulin  | 62  | 71  | 171.46 | 2637500000 |
| VRTPEVDDE       | 9  | 1058.488 | sp P02754 LACB_BOVINBeta-lactoglobulin  | 139 | 147 | 170.3  | 4400600000 |
| DTDYKKYL        | 8  | 1044.513 | sp P02754 LACB_BOVINBeta-lactoglobulin  | 112 | 119 | 166.05 | 1499300000 |
| LDTDYKKYL       | 9  | 1157.597 | sp P02754 LACB_BOVINBeta-lactoglobulin  | 111 | 119 | 165.72 | 211320000  |
| LVRTPEVDDEALEK  | 14 | 1612.831 | sp P02754 LACB_BOVINBeta-lactoglobulin  | 138 | 151 | 164.81 | 2058000000 |
| HIRLSFNPT       | 9  | 1083.583 | sp P02754 LACB_BOVINBeta-lactoglobulin  | 162 | 170 | 163.9  | 623970000  |
| RTPEVDDE        | 8  | 959.4196 | sp P02754 LACB_BOVINBeta-lactoglobulin  | 140 | 147 | 162.5  | 1457100000 |
| LDKVGINYWLAH    | 12 | 1427.756 | sp P00711 LALBA_BOVINAAlpha-lactalbumin | 115 | 126 | 161.63 | 24129000   |
| SAEPEQSL        | 8  | 859.3923 | sp P02754 LACB_BOVINBeta-lactoglobulin  | 126 | 133 | 160.54 | 351910000  |
| NDSTEYGLF       | 9  | 1044.44  | sp P00711 LALBA_BOVINAAlpha-lactalbumin | 64  | 72  | 159.04 | 3914400000 |
| ALNENKVL        | 8  | 899.5076 | sp P02754 LACB_BOVINBeta-lactoglobulin  | 102 | 109 | 157.33 | 1861400000 |
| DIQKVAGTW       | 9  | 1016.529 | sp P02754 LACB_BOVINBeta-lactoglobulin  | 27  | 35  | 157.2  | 5194900000 |

|                    |    |          |                                         |     |     |        |             |
|--------------------|----|----------|-----------------------------------------|-----|-----|--------|-------------|
| LDTDYKKY           | 8  | 1044.513 | sp P02754 LACB_BOVINBeta-lactoglobulin  | 111 | 118 | 156.4  | 524570000   |
| MENSAEPEQSL        | 11 | 1233.518 | sp P02754 LACB_BOVINBeta-lactoglobulin  | 123 | 133 | 156.35 | 218670000   |
| EVFRELKDL          | 9  | 1147.624 | sp P00711 LALBA_BOVINAAlpha-lactalbumin | 26  | 34  | 155.42 | 138800000   |
| IAEKTKIPAVF        | 11 | 1215.723 | sp P02754 LACB_BOVINBeta-lactoglobulin  | 88  | 98  | 154.85 | 758910000   |
| LSFNPTQLEE         | 10 | 1176.566 | sp P02754 LACB_BOVINBeta-lactoglobulin  | 165 | 174 | 154.12 | 40151000    |
| EELKPTPEGDLEIL     | 14 | 1581.814 | sp P02754 LACB_BOVINBeta-lactoglobulin  | 60  | 73  | 153.12 | 550240000   |
| KFLDDDLTDDIM       | 12 | 1439.649 | sp P00711 LALBA_BOVINAAlpha-lactalbumin | 98  | 109 | 153.05 | 122490000   |
| ALEKFDKALKALPM     | 14 | 1573.89  | sp P02754 LACB_BOVINBeta-lactoglobulin  | 148 | 161 | 151.79 | 44925000    |
| DTDYKKYLLF         | 10 | 1304.665 | sp P02754 LACB_BOVINBeta-lactoglobulin  | 112 | 121 | 150.4  | 11588000000 |
| VFRELKDLKGY        | 11 | 1366.761 | sp P00711 LALBA_BOVINAAlpha-lactalbumin | 27  | 37  | 150.08 | 1014700000  |
| DTDYKKYLL          | 9  | 1157.597 | sp P02754 LACB_BOVINBeta-lactoglobulin  | 112 | 120 | 150.05 | 8688600000  |
| ELKPTPEGDLEI       | 12 | 1339.687 | sp P02754 LACB_BOVINBeta-lactoglobulin  | 61  | 72  | 148.91 | 176590000   |
| KTKIPAVF           | 8  | 902.5589 | sp P02754 LACB_BOVINBeta-lactoglobulin  | 91  | 98  | 147.52 | 56785000000 |
| FNPTQLEEQ          | 9  | 1104.509 | sp P02754 LACB_BOVINBeta-lactoglobulin  | 167 | 175 | 147.36 | 458980000   |
| VLDTDYKKY          | 9  | 1143.581 | sp P02754 LACB_BOVINBeta-lactoglobulin  | 110 | 118 | 147.19 | 10576000000 |
| LSFNPTQL           | 8  | 918.4811 | sp P02754 LACB_BOVINBeta-lactoglobulin  | 165 | 172 | 147.16 | 349150000   |
| GYDTQAIQV          | 9  | 993.4767 | sp P00711 LALBA_BOVINAAlpha-lactalbumin | 54  | 62  | 144.83 | 2665200000  |
| VAGTWYSL           | 8  | 895.444  | sp P02754 LACB_BOVINBeta-lactoglobulin  | 31  | 38  | 144.58 | 74496000    |
| GYDTQAIQVQNNNDSTEY | 16 | 1816.775 | sp P00711 LALBA_BOVINAAlpha-lactalbumin | 54  | 69  | 143    | 46927000    |
| KILDKVGINYW        | 11 | 1347.755 | sp P00711 LALBA_BOVINAAlpha-lactalbumin | 113 | 123 | 141.95 | 4062600000  |
| ENSAEPEQSL         | 10 | 1102.478 | sp P02754 LACB_BOVINBeta-lactoglobulin  | 124 | 133 | 140.84 | 781300000   |
| NNDSTEYGLFQ        | 11 | 1286.542 | sp P00711 LALBA_BOVINAAlpha-lactalbumin | 63  | 73  | 140.35 | 53123000    |
| AIVQNNNDSTEYGL     | 13 | 1422.663 | sp P00711 LALBA_BOVINAAlpha-lactalbumin | 59  | 71  | 140.14 | 96874000    |
| VEELKPTPE          | 9  | 1040.539 | sp P02754 LACB_BOVINBeta-lactoglobulin  | 59  | 67  | 140.14 | 9711300000  |
| EKFDKALKALPM       | 12 | 1389.769 | sp P02754 LACB_BOVINBeta-lactoglobulin  | 150 | 161 | 139.86 | 78434000    |

|                  |    |          |                                         |     |     |        |             |
|------------------|----|----------|-----------------------------------------|-----|-----|--------|-------------|
| VEELKPTPEGD      | 11 | 1212.587 | sp P02754 LACB_BOVINBeta-lactoglobulin  | 59  | 69  | 139.38 | 424300000   |
| SDISLLDAQSAPLRVY | 16 | 1746.915 | sp P02754 LACB_BOVINBeta-lactoglobulin  | 43  | 58  | 138.89 | 30570000    |
| IIAEKTKIPAVF     | 12 | 1328.807 | sp P02754 LACB_BOVINBeta-lactoglobulin  | 87  | 98  | 138.22 | 38298000000 |
| LVRTPEVDDEALE    | 13 | 1484.736 | sp P02754 LACB_BOVINBeta-lactoglobulin  | 138 | 150 | 138.22 | 29387000000 |
| ILDKVGIN         | 8  | 870.5175 | sp P00711 LALBA_BOVINAAlpha-lactalbumin | 114 | 121 | 137.62 | 2010200000  |
| EKTKIPAVF        | 9  | 1031.602 | sp P02754 LACB_BOVINBeta-lactoglobulin  | 90  | 98  | 134.48 | 13746000000 |
| KPTPEGDLE        | 9  | 984.4764 | sp P02754 LACB_BOVINBeta-lactoglobulin  | 63  | 71  | 133.55 | 177450000   |
| NNDSTEYGLF       | 10 | 1158.483 | sp P00711 LALBA_BOVINAAlpha-lactalbumin | 63  | 72  | 133.12 | 5213500000  |
| VRTPEVDDEALE     | 12 | 1371.652 | sp P02754 LACB_BOVINBeta-lactoglobulin  | 139 | 150 | 132.88 | 6837700000  |
| KDLKGYGGV        | 9  | 935.5076 | sp P00711 LALBA_BOVINAAlpha-lactalbumin | 32  | 40  | 132.76 | 460080000   |
| LQKWENGE         | 8  | 1002.477 | sp P02754 LACB_BOVINBeta-lactoglobulin  | 74  | 81  | 132.57 | 552120000   |
| KILDKVGINYWLA    | 13 | 1531.876 | sp P00711 LALBA_BOVINAAlpha-lactalbumin | 113 | 125 | 131.43 | 3862400000  |
| ILDKVGINY        | 9  | 1033.581 | sp P00711 LALBA_BOVINAAlpha-lactalbumin | 114 | 122 | 131.41 | 1447000000  |
| LVRTPEVDDEAL     | 12 | 1355.693 | sp P02754 LACB_BOVINBeta-lactoglobulin  | 138 | 149 | 130.66 | 8577400000  |
| LIVTQTMKGL       | 10 | 1102.642 | sp P02754 LACB_BOVINBeta-lactoglobulin  | 17  | 26  | 128.69 | 1846500000  |
| ELKPTPEGD        | 9  | 984.4764 | sp P02754 LACB_BOVINBeta-lactoglobulin  | 61  | 69  | 128.61 | 182340000   |
| NENKVLVL         | 8  | 927.5389 | sp P02754 LACB_BOVINBeta-lactoglobulin  | 104 | 111 | 128.57 | 678800000   |
| DIQKVAGTWY       | 10 | 1179.592 | sp P02754 LACB_BOVINBeta-lactoglobulin  | 27  | 36  | 128.38 | 519290000   |
| VRTPEVDDEALEK    | 13 | 1499.747 | sp P02754 LACB_BOVINBeta-lactoglobulin  | 139 | 151 | 128.31 | 172450000   |
| AEKTKIPAVF       | 10 | 1102.639 | sp P02754 LACB_BOVINBeta-lactoglobulin  | 89  | 98  | 126.31 | 757960000   |
| LDTDYKKYLL       | 10 | 1270.681 | sp P02754 LACB_BOVINBeta-lactoglobulin  | 111 | 120 | 126.24 | 64465000    |
| MAASDISLL        | 9  | 919.4685 | sp P02754 LACB_BOVINBeta-lactoglobulin  | 40  | 48  | 126.24 | 1513200000  |
| DKALKALPM        | 9  | 985.563  | sp P02754 LACB_BOVINBeta-lactoglobulin  | 153 | 161 | 125.31 | 12991000000 |
| FNPTQLEE         | 8  | 976.4502 | sp P02754 LACB_BOVINBeta-lactoglobulin  | 167 | 174 | 124.59 | 132160000   |
| AMAASDISLL       | 10 | 990.5056 | sp P02754 LACB_BOVINBeta-lactoglobulin  | 39  | 48  | 124.37 | 711290000   |



|                   |    |          |                                         |     |     |        |             |
|-------------------|----|----------|-----------------------------------------|-----|-----|--------|-------------|
| DIQKVAGTWYSL      | 12 | 1379.709 | sp P02754 LACB_BOVINBeta-lactoglobulin  | 27  | 38  | 123.79 | 391880000   |
| AMAASDISLLDAQ     | 13 | 1304.628 | sp P02754 LACB_BOVINBeta-lactoglobulin  | 39  | 51  | 122.94 | 443580000   |
| LVRTPEVDDEA       | 11 | 1242.609 | sp P02754 LACB_BOVINBeta-lactoglobulin  | 138 | 148 | 120.45 | 163050000   |
| KILDKVGINYWL      | 12 | 1460.839 | sp P00711 LALBA_BOVINAAlpha-lactalbumin | 113 | 124 | 119.53 | 114520000   |
| VLDTDYKKYLL       | 11 | 1369.749 | sp P02754 LACB_BOVINBeta-lactoglobulin  | 110 | 120 | 118.71 | 3469300000  |
| NSAEPEQSLA        | 10 | 1044.472 | sp P02754 LACB_BOVINBeta-lactoglobulin  | 125 | 134 | 118.5  | 246430000   |
| KVAGTWYSL         | 9  | 1023.539 | sp P02754 LACB_BOVINBeta-lactoglobulin  | 30  | 38  | 118.32 | 2274700000  |
| VEELKPTPEG        | 10 | 1097.561 | sp P02754 LACB_BOVINBeta-lactoglobulin  | 59  | 68  | 117.89 | 56716000    |
| KILDKVGINYWLAHKAL | 17 | 1981.151 | sp P00711 LALBA_BOVINAAlpha-lactalbumin | 113 | 129 | 115.87 | 1041700000  |
| LKPTPEGDLEIL      | 12 | 1323.729 | sp P02754 LACB_BOVINBeta-lactoglobulin  | 62  | 73  | 115.82 | 13890000000 |
| VFRELKDLKGYGGV    | 14 | 1579.872 | sp P00711 LALBA_BOVINAAlpha-lactalbumin | 27  | 40  | 115.82 | 97571000    |
| KKIIAEKTKIPAVF    | 14 | 1584.997 | sp P02754 LACB_BOVINBeta-lactoglobulin  | 85  | 98  | 113.69 | 221610000   |
| LVLDTDYKKY        | 10 | 1256.665 | sp P02754 LACB_BOVINBeta-lactoglobulin  | 109 | 118 | 113.22 | 871910000   |
| LDDDLTDDIM        | 10 | 1164.486 | sp P00711 LALBA_BOVINAAlpha-lactalbumin | 100 | 109 | 112.17 | 45178000    |
| VEELKPTPEGDL      | 12 | 1325.672 | sp P02754 LACB_BOVINBeta-lactoglobulin  | 59  | 70  | 111.86 | 378400000   |
| KKILDKVGIN        | 10 | 1126.707 | sp P00711 LALBA_BOVINAAlpha-lactalbumin | 112 | 121 | 111.61 | 297370000   |
| MENSAEPEQSLA      | 12 | 1304.555 | sp P02754 LACB_BOVINBeta-lactoglobulin  | 123 | 134 | 110.47 | 53895000    |
| DDLTDIM           | 8  | 936.3746 | sp P00711 LALBA_BOVINAAlpha-lactalbumin | 102 | 109 | 110.36 | 224240000   |
| DIQKVAGT          | 8  | 830.4498 | sp P02754 LACB_BOVINBeta-lactoglobulin  | 27  | 34  | 110.12 | 6234100000  |
| RELKDLKGY         | 9  | 1120.624 | sp P00711 LALBA_BOVINAAlpha-lactalbumin | 29  | 37  | 108.74 | 805370000   |
| LSFNPTQLEEQ       | 11 | 1304.625 | sp P02754 LACB_BOVINBeta-lactoglobulin  | 165 | 175 | 108.57 | 402370000   |
| YWLAHKAL          | 8  | 1000.549 | sp P00711 LALBA_BOVINAAlpha-lactalbumin | 122 | 129 | 107.74 | 4816100000  |
| GYDTQAIQVN        | 10 | 1107.52  | sp P00711 LALBA_BOVINAAlpha-lactalbumin | 54  | 63  | 107.29 | 280710000   |
| HIRLSFNPTQLE      | 12 | 1453.768 | sp P02754 LACB_BOVINBeta-lactoglobulin  | 162 | 173 | 105.98 | 33064000    |
| LDKVGINY          | 8  | 920.4967 | sp P00711 LALBA_BOVINAAlpha-lactalbumin | 115 | 122 | 105.81 | 27415000    |

|                  |    |          |                                         |     |     |        |             |
|------------------|----|----------|-----------------------------------------|-----|-----|--------|-------------|
| IVQNNDSTEYGLF    | 13 | 1498.694 | sp P00711 LALBA_BOVINAAlpha-lactalbumin | 60  | 72  | 104.2  | 59958000    |
| MAASDISLLDAQ     | 12 | 1233.591 | sp P02754 LACB_BOVINBeta-lactoglobulin  | 40  | 51  | 103.87 | 180830000   |
| KFDKALKAL        | 9  | 1032.633 | sp P02754 LACB_BOVINBeta-lactoglobulin  | 151 | 159 | 103.82 | 166580000   |
| VKKILDKVGIN      | 11 | 1225.776 | sp P00711 LALBA_BOVINAAlpha-lactalbumin | 111 | 121 | 103.46 | 144790000   |
| ALNENKVLVL       | 10 | 1111.66  | sp P02754 LACB_BOVINBeta-lactoglobulin  | 102 | 111 | 102.62 | 3404800000  |
| VRTPEVDDEAL      | 11 | 1242.609 | sp P02754 LACB_BOVINBeta-lactoglobulin  | 139 | 149 | 102.61 | 2737600000  |
| KFDKALKALPM      | 11 | 1260.726 | sp P02754 LACB_BOVINBeta-lactoglobulin  | 151 | 161 | 101.3  | 21253000000 |
| YVEELKPTPEGDL    | 14 | 1617.777 | sp P02754 LACB_BOVINBeta-lactoglobulin  | 58  | 71  | 100.69 | 33961000    |
| DYKKYLLF         | 8  | 1088.591 | sp P02754 LACB_BOVINBeta-lactoglobulin  | 114 | 121 | 100.39 | 79477000    |
| GGVSLPEW         | 8  | 843.4127 | sp P00711 LALBA_BOVINAAlpha-lactalbumin | 38  | 45  | 99.279 | 292630000   |
| DKVGINYWLA       | 10 | 1177.613 | sp P00711 LALBA_BOVINAAlpha-lactalbumin | 116 | 125 | 98.033 | 194560000   |
| KFDKALKALPMHIR   | 14 | 1666.971 | sp P02754 LACB_BOVINBeta-lactoglobulin  | 151 | 164 | 97.551 | 577520000   |
| IIAEKTKIPAVFK    | 13 | 1456.902 | sp P02754 LACB_BOVINBeta-lactoglobulin  | 87  | 99  | 96.591 | 124600000   |
| KTKIPAVFK        | 9  | 1030.654 | sp P02754 LACB_BOVINBeta-lactoglobulin  | 91  | 99  | 96.331 | 431210000   |
| KFDKALKALPMHIRL  | 15 | 1780.055 | sp P02754 LACB_BOVINBeta-lactoglobulin  | 151 | 165 | 96.247 | 80161000    |
| KTKIPAVFKI       | 10 | 1143.738 | sp P02754 LACB_BOVINBeta-lactoglobulin  | 91  | 100 | 96.171 | 109520000   |
| TDYKKYLL         | 8  | 1042.57  | sp P02754 LACB_BOVINBeta-lactoglobulin  | 113 | 120 | 95.909 | 24069000    |
| FDKALKALPM       | 10 | 1132.632 | sp P02754 LACB_BOVINBeta-lactoglobulin  | 152 | 161 | 95.608 | 1224200000  |
| LVRTPEVDDEALEKF  | 15 | 1759.899 | sp P02754 LACB_BOVINBeta-lactoglobulin  | 138 | 152 | 95.428 | 90878000    |
| KILDKVGINYWLAHKA | 16 | 1868.067 | sp P00711 LALBA_BOVINAAlpha-lactalbumin | 113 | 128 | 95.197 | 1481800000  |
| KFLDDDLTD        | 9  | 1080.498 | sp P00711 LALBA_BOVINAAlpha-lactalbumin | 98  | 106 | 92.439 | 130450000   |
| DKVGINYW         | 8  | 993.492  | sp P00711 LALBA_BOVINAAlpha-lactalbumin | 116 | 123 | 92.187 | 23198000    |
| VDDEALEKF        | 9  | 1064.503 | sp P02754 LACB_BOVINBeta-lactoglobulin  | 144 | 152 | 91.069 | 37907000    |
| KIDALNENKVL      | 11 | 1255.714 | sp P02754 LACB_BOVINBeta-lactoglobulin  | 99  | 109 | 90.964 | 150070000   |
| IIAEKTKIPA       | 10 | 1082.67  | sp P02754 LACB_BOVINBeta-lactoglobulin  | 87  | 96  | 89.886 | 233020000   |

|                      |    |          |                                         |     |     |        |            |
|----------------------|----|----------|-----------------------------------------|-----|-----|--------|------------|
| QNNDSTEYGLF          | 11 | 1286.542 | sp P00711 LALBA_BOVINAAlpha-lactalbumin | 62  | 72  | 89.355 | 37755000   |
| MENSAEPEQS           | 10 | 1120.434 | sp P02754 LACB_BOVINBeta-lactoglobulin  | 123 | 132 | 88.921 | 41613000   |
| TDYKKYLLF            | 9  | 1189.638 | sp P02754 LACB_BOVINBeta-lactoglobulin  | 113 | 121 | 88.819 | 49015000   |
| LVLDTDYKKYL          | 11 | 1369.749 | sp P02754 LACB_BOVINBeta-lactoglobulin  | 109 | 119 | 87.789 | 119720000  |
| RVYVEELKPTPEGDLEIL   | 18 | 2099.115 | sp P02754 LACB_BOVINBeta-lactoglobulin  | 56  | 73  | 87.287 | 31074000   |
| KALPMHIRL            | 9  | 1077.648 | sp P02754 LACB_BOVINBeta-lactoglobulin  | 157 | 165 | 85.67  | 159250000  |
| AASDISLL             | 8  | 788.428  | sp P02754 LACB_BOVINBeta-lactoglobulin  | 41  | 48  | 85.061 | 79669000   |
| RTPEVDDEALEK         | 12 | 1400.678 | sp P02754 LACB_BOVINBeta-lactoglobulin  | 140 | 151 | 79.886 | 75071000   |
| LVLDTDYKKYLL         | 12 | 1482.833 | sp P02754 LACB_BOVINBeta-lactoglobulin  | 109 | 120 | 79.82  | 33639000   |
| TMKGLDIQ             | 8  | 904.4688 | sp P02754 LACB_BOVINBeta-lactoglobulin  | 22  | 29  | 79.596 | 1026700000 |
| KALPMHIR             | 8  | 964.564  | sp P02754 LACB_BOVINBeta-lactoglobulin  | 157 | 164 | 79.451 | 66324000   |
| KILDKVGI             | 8  | 884.5695 | sp P00711 LALBA_BOVINAAlpha-lactalbumin | 113 | 120 | 78.377 | 21687000   |
| RTPEVDDEALE          | 11 | 1272.583 | sp P02754 LACB_BOVINBeta-lactoglobulin  | 140 | 150 | 78.098 | 1926400000 |
| KILDKVGINYWLAHK      | 15 | 1797.03  | sp P00711 LALBA_BOVINAAlpha-lactalbumin | 113 | 127 | 76.82  | 7115900000 |
| VLDTDYKKYL           | 10 | 1256.665 | sp P02754 LACB_BOVINBeta-lactoglobulin  | 110 | 119 | 76.465 | 4686500000 |
| ILDKVGINYW           | 10 | 1219.66  | sp P00711 LALBA_BOVINAAlpha-lactalbumin | 114 | 123 | 76.17  | 23809000   |
| MENSAEPE             | 8  | 905.3437 | sp P02754 LACB_BOVINBeta-lactoglobulin  | 123 | 130 | 76.035 | 26446000   |
| LVRTPEVDDEALEKFDKALK | 20 | 2315.237 | sp P02754 LACB_BOVINBeta-lactoglobulin  | 138 | 157 | 76.027 | 94104000   |
| IRLSFNPT             | 8  | 946.5236 | sp P02754 LACB_BOVINBeta-lactoglobulin  | 163 | 170 | 74.929 | 186390000  |
| TMKGLDIQKVA          | 11 | 1202.669 | sp P02754 LACB_BOVINBeta-lactoglobulin  | 22  | 32  | 74.611 | 34802000   |
| VRTPEVDDEALEKF       | 14 | 1646.815 | sp P02754 LACB_BOVINBeta-lactoglobulin  | 139 | 152 | 74.257 | 49563000   |
| KGYGGVSLPEW          | 11 | 1191.592 | sp P00711 LALBA_BOVINAAlpha-lactalbumin | 35  | 45  | 73.985 | 11754000   |
| KALKALPM             | 8  | 870.5361 | sp P02754 LACB_BOVINBeta-lactoglobulin  | 154 | 161 | 73.637 | 74897000   |
| LVRTPEVD             | 8  | 927.5026 | sp P02754 LACB_BOVINBeta-lactoglobulin  | 138 | 145 | 73.26  | 223810000  |
| HIRLSFNPTQL          | 11 | 1324.725 | sp P02754 LACB_BOVINBeta-lactoglobulin  | 162 | 172 | 73.067 | 31179000   |

|             |    |          |                                         |     |     |        |           |
|-------------|----|----------|-----------------------------------------|-----|-----|--------|-----------|
| HTSGYDTQ    | 8  | 907.3672 | sp P00711 LALBA_BOVINAAlpha-lactalbumin | 51  | 58  | 73.039 | 30349000  |
| KDLKGYGG    | 8  | 836.4392 | sp P00711 LALBA_BOVINAAlpha-lactalbumin | 32  | 39  | 72.789 | 11271000  |
| IVQNDSTE    | 9  | 1018.457 | sp P00711 LALBA_BOVINAAlpha-lactalbumin | 60  | 68  | 72.138 | 80358000  |
| AEPEQSLA    | 8  | 843.3974 | sp P02754 LACB_BOVINBeta-lactoglobulin  | 127 | 134 | 69.628 | 39624000  |
| VFRELKDL    | 8  | 1018.581 | sp P00711 LALBA_BOVINAAlpha-lactalbumin | 27  | 34  | 68.224 | 217910000 |
| SFNPTQLEEQ  | 10 | 1191.541 | sp P02754 LACB_BOVINBeta-lactoglobulin  | 166 | 175 | 67.414 | 49853000  |
| GINYWLAH    | 8  | 972.4818 | sp P00711 LALBA_BOVINAAlpha-lactalbumin | 119 | 126 | 67.285 | 18284000  |
| LKPTPEGDLEI | 11 | 1210.645 | sp P02754 LACB_BOVINBeta-lactoglobulin  | 62  | 72  | 66.568 | 698440000 |
| NSAEPEQS    | 8  | 860.3512 | sp P02754 LACB_BOVINBeta-lactoglobulin  | 125 | 132 | 66.457 | 123010000 |
| LVLDTDYK    | 8  | 965.507  | sp P02754 LACB_BOVINBeta-lactoglobulin  | 109 | 116 | 66.073 | 37498000  |
| LIVTQTMK    | 8  | 932.5365 | sp P02754 LACB_BOVINBeta-lactoglobulin  | 17  | 24  | 65.313 | 258570000 |
| VDDEALEK    | 8  | 917.4342 | sp P02754 LACB_BOVINBeta-lactoglobulin  | 144 | 151 | 63.673 | 272050000 |
| DAQSAPLR    | 8  | 856.4403 | sp P02754 LACB_BOVINBeta-lactoglobulin  | 49  | 56  | 63.21  | 223560000 |
| ASDISLLDAQ  | 10 | 1031.514 | sp P02754 LACB_BOVINBeta-lactoglobulin  | 42  | 51  | 62.969 | 22576000  |
| SDISLLDAQ   | 9  | 960.4764 | sp P02754 LACB_BOVINBeta-lactoglobulin  | 43  | 51  | 60.682 | 23336000  |
| EKFDKALK    | 8  | 977.5546 | sp P02754 LACB_BOVINBeta-lactoglobulin  | 150 | 157 | 59.35  | 62355000  |
| KVAGTWYSLA  | 10 | 1094.576 | sp P02754 LACB_BOVINBeta-lactoglobulin  | 30  | 39  | 59.245 | 711060000 |
| VLVLDTDYK   | 9  | 1064.575 | sp P02754 LACB_BOVINBeta-lactoglobulin  | 108 | 116 | 59.245 | 34399000  |
| ALPMHIRL    | 8  | 949.5531 | sp P02754 LACB_BOVINBeta-lactoglobulin  | 158 | 165 | 57.281 | 63109000  |
| LKPTPEGDL   | 9  | 968.5179 | sp P02754 LACB_BOVINBeta-lactoglobulin  | 62  | 70  | 56.258 | 62347000  |
| KIDALNENK   | 9  | 1043.561 | sp P02754 LACB_BOVINBeta-lactoglobulin  | 99  | 107 | 55.064 | 102400000 |
| FHTSGYDTQ   | 9  | 1054.436 | sp P00711 LALBA_BOVINAAlpha-lactalbumin | 50  | 58  | 54.205 | 322980000 |
| VRTPEVDD    | 8  | 929.4454 | sp P02754 LACB_BOVINBeta-lactoglobulin  | 139 | 146 | 54.157 | 18918000  |
| KTKIPAVFKID | 11 | 1258.765 | sp P02754 LACB_BOVINBeta-lactoglobulin  | 91  | 101 | 54.005 | 608590000 |
| TPEVDDEALE  | 10 | 1116.482 | sp P02754 LACB_BOVINBeta-lactoglobulin  | 141 | 150 | 53.878 | 82474000  |

|                 |    |          |                                         |     |     |        |           |
|-----------------|----|----------|-----------------------------------------|-----|-----|--------|-----------|
| YGLFQINNK       | 9  | 1095.571 | sp P00711 LALBA_BOVINAAlpha-lactalbumin | 69  | 77  | 52.403 | 26228000  |
| DSTEYGLF        | 8  | 930.3971 | sp P00711 LALBA_BOVINAAlpha-lactalbumin | 65  | 72  | 52.299 | 776590000 |
| ENSAEPEQS       | 9  | 989.3938 | sp P02754 LACB_BOVINBeta-lactoglobulin  | 124 | 132 | 51.193 | 75671000  |
| DKALKALPMH      | 10 | 1122.622 | sp P02754 LACB_BOVINBeta-lactoglobulin  | 153 | 162 | 49.715 | 7340900   |
| KALCSEKL        | 8  | 890.4895 | sp P00711 LALBA_BOVINAAlpha-lactalbumin | 127 | 134 | 49.536 | 6592100   |
| DIMCVKKILDKVGIN | 15 | 1687.937 | sp P00711 LALBA_BOVINAAlpha-lactalbumin | 107 | 121 | 48.284 | 84456000  |
| KPTPEGDLEIL     | 11 | 1210.645 | sp P02754 LACB_BOVINBeta-lactoglobulin  | 63  | 73  | 48.091 | 83590000  |
| KGYGGVSLPE      | 10 | 1005.513 | sp P00711 LALBA_BOVINAAlpha-lactalbumin | 35  | 44  | 47.869 | 238320000 |
| KIDALNEN        | 8  | 915.4662 | sp P02754 LACB_BOVINBeta-lactoglobulin  | 99  | 106 | 47.657 | 204150000 |
| EELKPTPEGDLE    | 12 | 1355.646 | sp P02754 LACB_BOVINBeta-lactoglobulin  | 60  | 71  | 46.462 | 41656000  |
| TKIPAVFK        | 8  | 902.5589 | sp P02754 LACB_BOVINBeta-lactoglobulin  | 92  | 99  | 45.335 | 39026000  |

**Table S4:** Peptide mapping information of hydrolysate of ozonated whey protein.

| Sequence | Length | Mass     | Leading razor protein                   | Start position | End position | Score  | Intensity   |
|----------|--------|----------|-----------------------------------------|----------------|--------------|--------|-------------|
| NNDSTEY  | 7      | 841.309  | sp P00711 LALBA_BOVINAAlpha-lactalbumin | 63             | 69           | 197.16 | 1909100000  |
| DTDYKKY  | 7      | 931.4287 | sp P02754 LACB_BOVINBeta-lactoglobulin  | 112            | 118          | 171.08 | 1234200000  |
| LIVTQ    | 5      | 572.3534 | sp P02754 LACB_BOVINBeta-lactoglobulin  | 17             | 21           | 161.77 | 2455100000  |
| ALCSE    | 5      | 521.2156 | sp P00711 LALBA_BOVINAAlpha-lactalbumin | 128            | 132          | 158.84 | 16122000    |
| EVFREL   | 6      | 791.4178 | sp P00711 LALBA_BOVINAAlpha-lactalbumin | 26             | 31           | 155.73 | 39871000000 |
| GYDTQ    | 5      | 582.2286 | sp P00711 LALBA_BOVINAAlpha-lactalbumin | 54             | 58           | 154.44 | 3424000000  |
| LKDLKGY  | 7      | 835.4804 | sp P00711 LALBA_BOVINAAlpha-lactalbumin | 31             | 37           | 154.01 | 856270000   |
| TWYSL    | 5      | 668.317  | sp P02754 LACB_BOVINBeta-lactoglobulin  | 34             | 38           | 153.57 | 491980000   |
| KIDAL    | 5      | 558.3377 | sp P02754 LACB_BOVINBeta-lactoglobulin  | 99             | 103          | 150    | 7722800000  |
| KFDKALK  | 7      | 848.512  | sp P02754 LACB_BOVINBeta-lactoglobulin  | 151            | 157          | 149.4  | 3312700000  |
| LIVTQT   | 6      | 673.401  | sp P02754 LACB_BOVINBeta-lactoglobulin  | 17             | 22           | 144.29 | 31976000    |
| KDLKGY   | 6      | 722.3963 | sp P00711 LALBA_BOVINAAlpha-lactalbumin | 32             | 37           | 143.97 | 19831000000 |
| DTDYK    | 5      | 640.2704 | sp P02754 LACB_BOVINBeta-lactoglobulin  | 112            | 116          | 143.88 | 64027000    |
| KIIAEKT  | 7      | 801.496  | sp P02754 LACB_BOVINBeta-lactoglobulin  | 86             | 92           | 143.61 | 9643600     |
| EYGLF    | 5      | 627.2904 | sp P00711 LALBA_BOVINAAlpha-lactalbumin | 68             | 72           | 143.11 | 617730000   |
| DKVGIN   | 6      | 644.3493 | sp P00711 LALBA_BOVINAAlpha-lactalbumin | 116            | 121          | 137.59 | 4864200000  |
| KILDK    | 5      | 615.3956 | sp P00711 LALBA_BOVINAAlpha-lactalbumin | 113            | 117          | 135.25 | 118630000   |
| KTKIPAV  | 7      | 755.4905 | sp P02754 LACB_BOVINBeta-lactoglobulin  | 91             | 97           | 132.53 | 22247000    |
| KKIIAE   | 6      | 700.4483 | sp P02754 LACB_BOVINBeta-lactoglobulin  | 85             | 90           | 130.84 | 654770000   |
| TDYKKY   | 6      | 816.4018 | sp P02754 LACB_BOVINBeta-lactoglobulin  | 113            | 118          | 130.84 | 265480000   |
| KILDKV   | 6      | 714.464  | sp P00711 LALBA_BOVINAAlpha-lactalbumin | 113            | 118          | 130.05 | 1847600000  |

|        |   |          |                                        |     |     |        |            |
|--------|---|----------|----------------------------------------|-----|-----|--------|------------|
| FDKALK | 6 | 720.417  | sp P02754 LACB_BOVINBeta-lactoglobulin | 152 | 157 | 129.96 | 255490000  |
| VAGTWY | 6 | 695.3279 | sp P02754 LACB_BOVINBeta-lactoglobulin | 31  | 36  | 128.65 | 687830000  |
| VLDTD  | 5 | 561.2646 | sp P02754 LACB_BOVINBeta-lactoglobulin | 110 | 114 | 127.53 | 57755000   |
| INNKIW | 6 | 786.4388 | sp P00711 LALBA_BOVINAlpha-lactalbumin | 74  | 79  | 126.38 | 57589000   |
| VFREL  | 5 | 662.3752 | sp P00711 LALBA_BOVINAlpha-lactalbumin | 27  | 31  | 123.53 | 5248200000 |
| VDDEAL | 6 | 660.2966 | sp P02754 LACB_BOVINBeta-lactoglobulin | 144 | 149 | 123.4  | 155050000  |
| QAIVQ  | 5 | 557.3173 | sp P00711 LALBA_BOVINAlpha-lactalbumin | 58  | 62  | 123.06 | 425220000  |
| IVTQ   | 4 | 459.2693 | sp P02754 LACB_BOVINBeta-lactoglobulin | 18  | 21  | 121.92 | 1137100000 |
| NENKVL | 6 | 715.3865 | sp P02754 LACB_BOVINBeta-lactoglobulin | 104 | 109 | 120.9  | 1555800000 |
| VAGTW  | 5 | 532.2646 | sp P02754 LACB_BOVINBeta-lactoglobulin | 31  | 35  | 120    | 896610000  |
| VGINY  | 5 | 564.2908 | sp P00711 LALBA_BOVINAlpha-lactalbumin | 118 | 122 | 120    | 416470000  |
| FQIN   | 4 | 520.2646 | sp P00711 LALBA_BOVINAlpha-lactalbumin | 72  | 75  | 119.89 | 1056300000 |
| EQLTK  | 5 | 617.3384 | sp P00711 LALBA_BOVINAlpha-lactalbumin | 20  | 24  | 119.22 | 829400000  |
| DIQKVA | 6 | 672.3806 | sp P02754 LACB_BOVINBeta-lactoglobulin | 27  | 32  | 117.56 | 4141000000 |
| AIVQN  | 5 | 543.3017 | sp P00711 LALBA_BOVINAlpha-lactalbumin | 59  | 63  | 115.97 | 3086400000 |
| DSTEY  | 5 | 613.2231 | sp P00711 LALBA_BOVINAlpha-lactalbumin | 65  | 69  | 114.73 | 37458000   |
| QTMKGL | 6 | 676.3578 | sp P02754 LACB_BOVINBeta-lactoglobulin | 21  | 26  | 114.02 | 527040000  |
| KIPAVF | 6 | 673.4163 | sp P02754 LACB_BOVINBeta-lactoglobulin | 93  | 98  | 113.63 | 1437700000 |
| KTKIPA | 6 | 656.4221 | sp P02754 LACB_BOVINBeta-lactoglobulin | 91  | 96  | 113.08 | 893060000  |
| PEQSL  | 5 | 572.2806 | sp P02754 LACB_BOVINBeta-lactoglobulin | 129 | 133 | 113.07 | 30723000   |
| KPTPE  | 5 | 570.3013 | sp P02754 LACB_BOVINBeta-lactoglobulin | 63  | 67  | 112.88 | 6295500    |
| YWLAH  | 5 | 688.3333 | sp P00711 LALBA_BOVINAlpha-lactalbumin | 122 | 126 | 111.84 | 1629900000 |
| KALPMH | 6 | 695.3789 | sp P02754 LACB_BOVINBeta-lactoglobulin | 157 | 162 | 110.43 | 17497000   |
| DISLL  | 5 | 559.3217 | sp P02754 LACB_BOVINBeta-lactoglobulin | 44  | 48  | 110.2  | 4513900000 |
| YGLFQ  | 5 | 626.3064 | sp P00711 LALBA_BOVINAlpha-lactalbumin | 69  | 73  | 110.2  | 4418400000 |

|         |   |          |                                         |     |     |        |             |
|---------|---|----------|-----------------------------------------|-----|-----|--------|-------------|
| VYVE    | 4 | 508.2533 | sp P02754 LACB_BOVINBeta-lactoglobulin  | 57  | 60  | 109.97 | 85337000    |
| SFNPT   | 5 | 564.2544 | sp P02754 LACB_BOVINBeta-lactoglobulin  | 166 | 170 | 109.94 | 1362200000  |
| QKVAGT  | 6 | 602.3388 | sp P02754 LACB_BOVINBeta-lactoglobulin  | 29  | 34  | 109.8  | 83918000    |
| GLFQIN  | 6 | 690.3701 | sp P00711 LALBA_BOVINAAlpha-lactalbumin | 70  | 75  | 109.6  | 3045500000  |
| QLTK    | 4 | 488.2959 | sp P00711 LALBA_BOVINAAlpha-lactalbumin | 21  | 24  | 109.53 | 6704800     |
| GDLEIL  | 6 | 658.3538 | sp P02754 LACB_BOVINBeta-lactoglobulin  | 68  | 73  | 109.15 | 7160400000  |
| KIIAE   | 5 | 572.3534 | sp P02754 LACB_BOVINBeta-lactoglobulin  | 86  | 90  | 108.69 | 484860000   |
| AEPEQSL | 7 | 772.3603 | sp P02754 LACB_BOVINBeta-lactoglobulin  | 127 | 133 | 107.74 | 81564000    |
| IIAEKT  | 6 | 673.401  | sp P02754 LACB_BOVINBeta-lactoglobulin  | 87  | 92  | 107.65 | 1191600000  |
| GTWYSL  | 6 | 725.3384 | sp P02754 LACB_BOVINBeta-lactoglobulin  | 33  | 38  | 107.15 | 12162000000 |
| HIRLS   | 5 | 624.3707 | sp P02754 LACB_BOVINBeta-lactoglobulin  | 162 | 166 | 107.15 | 8732300000  |
| LQKWE   | 5 | 702.3701 | sp P02754 LACB_BOVINBeta-lactoglobulin  | 74  | 78  | 107.15 | 3371900000  |
| GDLE    | 4 | 432.1856 | sp P02754 LACB_BOVINBeta-lactoglobulin  | 68  | 71  | 105.36 | 37734000    |
| TKIPAVF | 7 | 774.464  | sp P02754 LACB_BOVINBeta-lactoglobulin  | 92  | 98  | 105.2  | 15391000000 |
| LQKW    | 4 | 573.3275 | sp P02754 LACB_BOVINBeta-lactoglobulin  | 74  | 77  | 104.58 | 214960000   |
| DLEIL   | 5 | 601.3323 | sp P02754 LACB_BOVINBeta-lactoglobulin  | 69  | 73  | 104.48 | 63597000    |
| IPAVF   | 5 | 545.3213 | sp P02754 LACB_BOVINBeta-lactoglobulin  | 94  | 98  | 104.08 | 55195000    |
| DYKKYL  | 6 | 828.4382 | sp P02754 LACB_BOVINBeta-lactoglobulin  | 114 | 119 | 103.28 | 119800000   |
| DAQSAPL | 7 | 700.3392 | sp P02754 LACB_BOVINBeta-lactoglobulin  | 49  | 55  | 102.8  | 9584800000  |
| AIVQ    | 4 | 429.2587 | sp P00711 LALBA_BOVINAAlpha-lactalbumin | 59  | 62  | 102.45 | 26034000000 |
| ISLL    | 4 | 444.2948 | sp P02754 LACB_BOVINBeta-lactoglobulin  | 45  | 48  | 102.45 | 813840000   |
| LIVT    | 4 | 444.2948 | sp P02754 LACB_BOVINBeta-lactoglobulin  | 17  | 20  | 102.45 | 11057000000 |
| LEEQ    | 4 | 517.2384 | sp P02754 LACB_BOVINBeta-lactoglobulin  | 172 | 175 | 102.4  | 10446000    |
| TFHTS   | 5 | 591.2653 | sp P00711 LALBA_BOVINAAlpha-lactalbumin | 49  | 53  | 102.29 | 617880000   |
| DISLLD  | 6 | 674.3487 | sp P02754 LACB_BOVINBeta-lactoglobulin  | 44  | 49  | 102.12 | 162900000   |



|         |   |          |                                         |     |     |        |            |
|---------|---|----------|-----------------------------------------|-----|-----|--------|------------|
| KFDKAL  | 6 | 720.417  | sp P02754 LACB_BOVINBeta-lactoglobulin  | 151 | 156 | 101.72 | 5316200000 |
| KGLDIQ  | 6 | 672.3806 | sp P02754 LACB_BOVINBeta-lactoglobulin  | 24  | 29  | 101.69 | 1183600000 |
| LDKVGIN | 7 | 757.4334 | sp P00711 LALBA_BOVINAAlpha-lactalbumin | 115 | 121 | 101.41 | 134860000  |
| LNENKVL | 7 | 828.4705 | sp P02754 LACB_BOVINBeta-lactoglobulin  | 103 | 109 | 101.28 | 631630000  |
| DISL    | 4 | 446.2377 | sp P02754 LACB_BOVINBeta-lactoglobulin  | 44  | 47  | 100.21 | 351810000  |
| FNPT    | 4 | 477.2224 | sp P02754 LACB_BOVINBeta-lactoglobulin  | 167 | 170 | 100.09 | 7401700000 |
| QSAPL   | 5 | 514.2751 | sp P02754 LACB_BOVINBeta-lactoglobulin  | 51  | 55  | 100.04 | 36423000   |
| LVRTPE  | 6 | 713.4072 | sp P02754 LACB_BOVINBeta-lactoglobulin  | 138 | 143 | 99.919 | 1163500000 |
| EQLT    | 4 | 489.2435 | sp P00711 LALBA_BOVINAAlpha-lactalbumin | 20  | 23  | 99.626 | 68701000   |
| EVFRE   | 5 | 678.3337 | sp P00711 LALBA_BOVINAAlpha-lactalbumin | 26  | 30  | 99.511 | 1339600000 |
| DYKKY   | 5 | 715.3541 | sp P02754 LACB_BOVINBeta-lactoglobulin  | 114 | 118 | 99.228 | 50673000   |
| NPTQL   | 5 | 571.2966 | sp P02754 LACB_BOVINBeta-lactoglobulin  | 168 | 172 | 98.513 | 36139000   |
| RELKDL  | 6 | 772.4443 | sp P00711 LALBA_BOVINAAlpha-lactalbumin | 29  | 34  | 98.415 | 2149000000 |
| DKALKAL | 7 | 757.4698 | sp P02754 LACB_BOVINBeta-lactoglobulin  | 153 | 159 | 97.033 | 63177000   |
| KKYLLF  | 6 | 810.5004 | sp P02754 LACB_BOVINBeta-lactoglobulin  | 116 | 121 | 96.839 | 174650000  |
| DEALE   | 5 | 575.2439 | sp P02754 LACB_BOVINBeta-lactoglobulin  | 146 | 150 | 96.372 | 54833000   |
| YWLAHK  | 6 | 816.4283 | sp P00711 LALBA_BOVINAAlpha-lactalbumin | 122 | 127 | 96.337 | 3778200000 |
| QLEEQ   | 5 | 645.297  | sp P02754 LACB_BOVINBeta-lactoglobulin  | 171 | 175 | 96.041 | 2054900    |
| ALNE    | 4 | 445.2173 | sp P02754 LACB_BOVINBeta-lactoglobulin  | 102 | 105 | 95.117 | 125220000  |
| FHTS    | 4 | 490.2176 | sp P00711 LALBA_BOVINAAlpha-lactalbumin | 50  | 53  | 94.737 | 611560000  |
| ILLQ    | 4 | 485.3213 | sp P02754 LACB_BOVINBeta-lactoglobulin  | 72  | 75  | 94.737 | 28179000   |
| EALE    | 4 | 460.2169 | sp P02754 LACB_BOVINBeta-lactoglobulin  | 147 | 150 | 94.533 | 56166000   |
| IRLS    | 4 | 487.3118 | sp P02754 LACB_BOVINBeta-lactoglobulin  | 163 | 166 | 94.268 | 289980000  |
| HIRL    | 4 | 537.3387 | sp P02754 LACB_BOVINBeta-lactoglobulin  | 162 | 165 | 94.118 | 693310000  |
| WYSL    | 4 | 567.2693 | sp P02754 LACB_BOVINBeta-lactoglobulin  | 35  | 38  | 94.118 | 9006400000 |

|         |   |          |                                        |     |     |        |            |
|---------|---|----------|----------------------------------------|-----|-----|--------|------------|
| FNPTQLE | 7 | 847.4076 | sp P02754 LACB_BOVINBeta-lactoglobulin | 167 | 173 | 94.006 | 129620000  |
| GLDIQ   | 5 | 544.2857 | sp P02754 LACB_BOVINBeta-lactoglobulin | 25  | 29  | 93.763 | 212860000  |
| QLEE    | 4 | 517.2384 | sp P02754 LACB_BOVINBeta-lactoglobulin | 171 | 174 | 93.045 | 691990000  |
| QINNKIW | 7 | 914.4974 | sp P00711 LALBA_BOVINAlpha-lactalbumin | 73  | 79  | 92.785 | 308470000  |
| WLAHKAL | 7 | 837.4861 | sp P00711 LALBA_BOVINAlpha-lactalbumin | 123 | 129 | 92.785 | 379860000  |
| TPEGDLE | 7 | 759.3287 | sp P02754 LACB_BOVINBeta-lactoglobulin | 65  | 71  | 92.692 | 16238000   |
| PMHIR   | 5 | 652.3479 | sp P02754 LACB_BOVINBeta-lactoglobulin | 160 | 164 | 92.151 | 242240000  |
| VEELKPT | 7 | 814.4436 | sp P02754 LACB_BOVINBeta-lactoglobulin | 59  | 65  | 91.906 | 57581000   |
| LAHKAL  | 6 | 651.4068 | sp P00711 LALBA_BOVINAlpha-lactalbumin | 124 | 129 | 90.631 | 395940000  |
| KVGIN   | 5 | 529.3224 | sp P00711 LALBA_BOVINAlpha-lactalbumin | 117 | 121 | 89.847 | 60041000   |
| LKALPM  | 6 | 671.404  | sp P02754 LACB_BOVINBeta-lactoglobulin | 156 | 161 | 89.775 | 4738900000 |
| TMKGL   | 5 | 548.2992 | sp P02754 LACB_BOVINBeta-lactoglobulin | 22  | 26  | 89.775 | 1461900000 |
| ALKALPM | 7 | 742.4411 | sp P02754 LACB_BOVINBeta-lactoglobulin | 155 | 161 | 88.627 | 2964800000 |
| DLKGY   | 5 | 594.3013 | sp P00711 LALBA_BOVINAlpha-lactalbumin | 33  | 37  | 88.626 | 953150000  |
| LRVY    | 4 | 549.3275 | sp P02754 LACB_BOVINBeta-lactoglobulin | 55  | 58  | 88.444 | 1789000000 |
| DQWL    | 4 | 560.2595 | sp P00711 LALBA_BOVINAlpha-lactalbumin | 135 | 138 | 87.945 | 230250000  |
| GLDIQK  | 6 | 672.3806 | sp P02754 LACB_BOVINBeta-lactoglobulin | 25  | 30  | 87.582 | 12591000   |
| FREL    | 4 | 563.3068 | sp P00711 LALBA_BOVINAlpha-lactalbumin | 28  | 31  | 87.265 | 6250800000 |
| LDIQ    | 4 | 487.2642 | sp P02754 LACB_BOVINBeta-lactoglobulin | 26  | 29  | 87.265 | 76385000   |
| VLDTDYK | 7 | 852.4229 | sp P02754 LACB_BOVINBeta-lactoglobulin | 110 | 116 | 86.866 | 891170000  |
| DYKKYLL | 7 | 941.5222 | sp P02754 LACB_BOVINBeta-lactoglobulin | 114 | 120 | 86.838 | 99348000   |
| LIVTQTM | 7 | 804.4415 | sp P02754 LACB_BOVINBeta-lactoglobulin | 17  | 23  | 86.838 | 8568200    |
| LLDAQ   | 5 | 558.3013 | sp P02754 LACB_BOVINBeta-lactoglobulin | 47  | 51  | 86.344 | 6601600    |
| LKPTPE  | 6 | 683.3854 | sp P02754 LACB_BOVINBeta-lactoglobulin | 62  | 67  | 86.121 | 397950000  |
| YKKYLL  | 6 | 826.4953 | sp P02754 LACB_BOVINBeta-lactoglobulin | 115 | 120 | 85.909 | 237070000  |

|         |   |          |                                        |     |     |        |            |
|---------|---|----------|----------------------------------------|-----|-----|--------|------------|
| LKPTPEG | 7 | 740.4069 | sp P02754 LACB_BOVINBeta-lactoglobulin | 62  | 68  | 85.89  | 15359000   |
| ELKPTPE | 7 | 812.428  | sp P02754 LACB_BOVINBeta-lactoglobulin | 61  | 67  | 85.359 | 533860000  |
| KVAGTWY | 7 | 823.4228 | sp P02754 LACB_BOVINBeta-lactoglobulin | 30  | 36  | 85.357 | 92903000   |
| ENKVL   | 5 | 601.3435 | sp P02754 LACB_BOVINBeta-lactoglobulin | 105 | 109 | 84.609 | 107040000  |
| STEY    | 4 | 498.1962 | sp P00711 LALBA_BOVINAlpha-lactalbumin | 66  | 69  | 84.485 | 25949000   |
| VEEL    | 4 | 488.2482 | sp P02754 LACB_BOVINBeta-lactoglobulin | 59  | 62  | 84.485 | 41445000   |
| ALE     | 3 | 331.1743 | sp P02754 LACB_BOVINBeta-lactoglobulin | 148 | 150 | 83.876 | 637440000  |
| ALPM    | 4 | 430.225  | sp P02754 LACB_BOVINBeta-lactoglobulin | 158 | 161 | 83.876 | 8277900000 |
| IVQ     | 3 | 358.2216 | sp P00711 LALBA_BOVINAlpha-lactalbumin | 60  | 62  | 83.876 | 107680000  |
| LLAL    | 4 | 428.2999 | sp P02754 LACB_BOVINBeta-lactoglobulin | 5   | 8   | 83.876 | 175950000  |
| PAVF    | 4 | 432.2373 | sp P02754 LACB_BOVINBeta-lactoglobulin | 95  | 98  | 83.876 | 346560000  |
| VLVL    | 4 | 442.3155 | sp P02754 LACB_BOVINBeta-lactoglobulin | 108 | 111 | 83.876 | 952130000  |
| GYGGV   | 5 | 451.2067 | sp P00711 LALBA_BOVINAlpha-lactalbumin | 36  | 40  | 83.661 | 22009000   |
| RVYVEE  | 6 | 793.397  | sp P02754 LACB_BOVINBeta-lactoglobulin | 56  | 61  | 83.229 | 353680000  |
| VGIN    | 4 | 401.2274 | sp P00711 LALBA_BOVINAlpha-lactalbumin | 118 | 121 | 82.602 | 150830000  |
| YSLA    | 4 | 452.2271 | sp P02754 LACB_BOVINBeta-lactoglobulin | 36  | 39  | 82.602 | 4319900000 |
| KVAGT   | 5 | 474.2802 | sp P02754 LACB_BOVINBeta-lactoglobulin | 30  | 34  | 82.141 | 25355000   |
| SDISLL  | 6 | 646.3538 | sp P02754 LACB_BOVINBeta-lactoglobulin | 43  | 48  | 80.498 | 25584000   |
| IVTQT   | 5 | 560.317  | sp P02754 LACB_BOVINBeta-lactoglobulin | 18  | 22  | 80.317 | 59686000   |
| EKFDKA  | 6 | 736.3756 | sp P02754 LACB_BOVINBeta-lactoglobulin | 150 | 155 | 79.469 | 6587900    |
| TTFHTS  | 6 | 692.313  | sp P00711 LALBA_BOVINAlpha-lactalbumin | 48  | 53  | 78.166 | 200650000  |
| AHKAL   | 5 | 538.3227 | sp P00711 LALBA_BOVINAlpha-lactalbumin | 125 | 129 | 77.925 | 44319000   |
| VEELK   | 5 | 616.3432 | sp P02754 LACB_BOVINBeta-lactoglobulin | 59  | 63  | 77.906 | 18939000   |
| LDTDYK  | 6 | 753.3545 | sp P02754 LACB_BOVINBeta-lactoglobulin | 111 | 116 | 77.748 | 14123000   |
| ALIVT   | 5 | 515.3319 | sp P02754 LACB_BOVINBeta-lactoglobulin | 16  | 20  | 77.448 | 210180000  |

|         |   |          |                                        |     |     |        |            |
|---------|---|----------|----------------------------------------|-----|-----|--------|------------|
| KALPM   | 5 | 558.32   | sp P02754 LACB_BOVINBeta-lactoglobulin | 157 | 161 | 77.448 | 6653700000 |
| LLQKW   | 5 | 686.4116 | sp P02754 LACB_BOVINBeta-lactoglobulin | 73  | 77  | 77.448 | 197850000  |
| QSLA    | 4 | 417.2224 | sp P02754 LACB_BOVINBeta-lactoglobulin | 131 | 134 | 77.448 | 34639000   |
| EEQCHI  | 6 | 757.3065 | sp P02754 LACB_BOVINBeta-lactoglobulin | 173 | 178 | 76.553 | 41747000   |
| LPMHIR  | 6 | 765.432  | sp P02754 LACB_BOVINBeta-lactoglobulin | 159 | 164 | 76.553 | 64419000   |
| QAIVQN  | 6 | 671.3602 | sp P00711 LALBA_BOVINAlpha-lactalbumin | 58  | 63  | 76.347 | 11570000   |
| GYDT    | 4 | 454.17   | sp P00711 LALBA_BOVINAlpha-lactalbumin | 54  | 57  | 75.898 | 8494200    |
| DIQKV   | 5 | 601.3435 | sp P02754 LACB_BOVINBeta-lactoglobulin | 27  | 31  | 75.682 | 13074000   |
| IIAEK   | 5 | 572.3534 | sp P02754 LACB_BOVINBeta-lactoglobulin | 87  | 91  | 74.849 | 235870000  |
| TDYKKYL | 7 | 929.4858 | sp P02754 LACB_BOVINBeta-lactoglobulin | 113 | 119 | 74.423 | 120620000  |
| YGLF    | 4 | 498.2478 | sp P00711 LALBA_BOVINAlpha-lactalbumin | 69  | 72  | 73.311 | 1420500000 |
| NYWLAH  | 6 | 802.3762 | sp P00711 LALBA_BOVINAlpha-lactalbumin | 121 | 126 | 73.289 | 10165000   |
| EVFRELK | 7 | 919.5127 | sp P00711 LALBA_BOVINAlpha-lactalbumin | 26  | 32  | 72.875 | 12652000   |
| KGYGGV  | 6 | 579.3017 | sp P00711 LALBA_BOVINAlpha-lactalbumin | 35  | 40  | 72.338 | 48716000   |
| LQKWEN  | 6 | 816.413  | sp P02754 LACB_BOVINBeta-lactoglobulin | 74  | 79  | 72.021 | 18280000   |
| ALEKF   | 5 | 606.3377 | sp P02754 LACB_BOVINBeta-lactoglobulin | 148 | 152 | 71.995 | 18438000   |
| TQTMKGL | 7 | 777.4055 | sp P02754 LACB_BOVINBeta-lactoglobulin | 20  | 26  | 71.949 | 11215000   |
| WLAHK   | 5 | 653.3649 | sp P00711 LALBA_BOVINAlpha-lactalbumin | 123 | 127 | 71.753 | 32031000   |
| RVYVE   | 5 | 664.3544 | sp P02754 LACB_BOVINBeta-lactoglobulin | 56  | 60  | 71.475 | 372990000  |
| YKKYL   | 5 | 713.4112 | sp P02754 LACB_BOVINBeta-lactoglobulin | 115 | 119 | 71.475 | 23784000   |
| IDAL    | 4 | 430.2428 | sp P02754 LACB_BOVINBeta-lactoglobulin | 100 | 103 | 70.435 | 270470000  |
| KVLVL   | 5 | 570.4105 | sp P02754 LACB_BOVINBeta-lactoglobulin | 107 | 111 | 69.776 | 1164700000 |
| KWENGE  | 6 | 761.3344 | sp P02754 LACB_BOVINBeta-lactoglobulin | 76  | 81  | 69.432 | 108150000  |
| QKKHAE  | 7 | 828.5069 | sp P02754 LACB_BOVINBeta-lactoglobulin | 84  | 90  | 69.383 | 54289000   |
| VFRELK  | 6 | 790.4701 | sp P00711 LALBA_BOVINAlpha-lactalbumin | 27  | 32  | 69.383 | 5333500    |

|                 |    |          |                                        |     |     |        |             |
|-----------------|----|----------|----------------------------------------|-----|-----|--------|-------------|
| EKFDKAL         | 7  | 849.4596 | sp P02754 LACB_BOVINBeta-lactoglobulin | 150 | 156 | 69.176 | 92156000    |
| AQSAPL          | 6  | 585.3122 | sp P02754 LACB_BOVINBeta-lactoglobulin | 50  | 55  | 69.093 | 74409000    |
| KLDQW           | 5  | 688.3544 | sp P00711 LALBA_BOVINAlpha-lactalbumin | 133 | 137 | 69.093 | 188900000   |
| VDDEALE         | 7  | 789.3392 | sp P02754 LACB_BOVINBeta-lactoglobulin | 144 | 150 | 68.485 | 38298000    |
| YWLAHKA         | 7  | 887.4654 | sp P00711 LALBA_BOVINAlpha-lactalbumin | 122 | 128 | 68.033 | 194850000   |
| ASDISLL         | 7  | 717.3909 | sp P02754 LACB_BOVINBeta-lactoglobulin | 42  | 48  | 67.76  | 36692000    |
| KVAGTW          | 6  | 660.3595 | sp P02754 LACB_BOVINBeta-lactoglobulin | 30  | 35  | 67.76  | 5367000000  |
| NKVLVL          | 6  | 684.4534 | sp P02754 LACB_BOVINBeta-lactoglobulin | 106 | 111 | 67.327 | 83264000    |
| KLDQWL          | 6  | 801.4385 | sp P00711 LALBA_BOVINAlpha-lactalbumin | 133 | 138 | 67.285 | 61925000    |
| HKALCSE         | 7  | 786.3694 | sp P00711 LALBA_BOVINAlpha-lactalbumin | 126 | 132 | 67.035 | 12226000    |
| LLQKWE          | 6  | 815.4541 | sp P02754 LACB_BOVINBeta-lactoglobulin | 73  | 78  | 66.994 | 36934000    |
| MHIRLS          | 6  | 755.4112 | sp P02754 LACB_BOVINBeta-lactoglobulin | 161 | 166 | 66.994 | 77573000    |
| LVLDT           | 5  | 559.3217 | sp P02754 LACB_BOVINBeta-lactoglobulin | 109 | 113 | 66.663 | 280100000   |
| MHIRL           | 5  | 668.3792 | sp P02754 LACB_BOVINBeta-lactoglobulin | 161 | 165 | 66.538 | 1821800000  |
| ALKAL           | 5  | 514.3479 | sp P02754 LACB_BOVINBeta-lactoglobulin | 155 | 159 | 63.055 | 19605000    |
| ALPMHIR         | 7  | 836.4691 | sp P02754 LACB_BOVINBeta-lactoglobulin | 158 | 164 | 62.978 | 644380000   |
| DTQAIVQ         | 7  | 773.3919 | sp P00711 LALBA_BOVINAlpha-lactalbumin | 56  | 62  | 62.715 | 165440000   |
| GTWYS           | 5  | 612.2544 | sp P02754 LACB_BOVINBeta-lactoglobulin | 33  | 37  | 58.256 | 144180000   |
| EQLTKC          | 6  | 720.3476 | sp P00711 LALBA_BOVINAlpha-lactalbumin | 20  | 25  | 58.246 | 38869000    |
| IIAEKTK         | 7  | 801.496  | sp P02754 LACB_BOVINBeta-lactoglobulin | 87  | 93  | 54.205 | 8492900     |
| KILDKVGINYWLAH  | 14 | 1668.935 | sp P00711 LALBA_BOVINAlpha-lactalbumin | 113 | 126 | 277.28 | 2211000000  |
| NSAEPEQSL       | 9  | 973.4353 | sp P02754 LACB_BOVINBeta-lactoglobulin | 125 | 133 | 256.48 | 3604800000  |
| QAIVQNNDSTEYGLF | 15 | 1697.79  | sp P00711 LALBA_BOVINAlpha-lactalbumin | 58  | 72  | 222    | 77122000    |
| AIVQNNDSTEYGLF  | 14 | 1569.731 | sp P00711 LALBA_BOVINAlpha-lactalbumin | 59  | 72  | 218.48 | 5934600000  |
| VEELKPTPEGDLE   | 13 | 1454.714 | sp P02754 LACB_BOVINBeta-lactoglobulin | 59  | 71  | 214.26 | 28992000000 |

|                 |    |          |                        |                    |     |     |        |             |
|-----------------|----|----------|------------------------|--------------------|-----|-----|--------|-------------|
| AIVQNNDSTE      | 10 | 1089.494 | sp P00711 LALBA_BOVINA | Alpha-lactalbumin  | 59  | 68  | 213.53 | 3954600000  |
| EVFRELKDLKGY    | 12 | 1495.804 | sp P00711 LALBA_BOVINA | Alpha-lactalbumin  | 26  | 37  | 210.93 | 718070000   |
| LVRTPEVDDE      | 10 | 1171.572 | sp P02754 LACB_BOVIN   | Beta-lactoglobulin | 138 | 147 | 199.89 | 9336600000  |
| AIVQNNDSTEY     | 11 | 1252.557 | sp P00711 LALBA_BOVINA | Alpha-lactalbumin  | 59  | 69  | 195.57 | 3722000000  |
| AIVQNNDSTEYGLFQ | 15 | 1697.79  | sp P00711 LALBA_BOVINA | Alpha-lactalbumin  | 59  | 73  | 195.51 | 242390000   |
| KILDKVGIN       | 9  | 998.6124 | sp P00711 LALBA_BOVINA | Alpha-lactalbumin  | 113 | 121 | 191.85 | 37194000000 |
| KILDKVGINY      | 10 | 1161.676 | sp P00711 LALBA_BOVINA | Alpha-lactalbumin  | 113 | 122 | 191.67 | 673380000   |
| ELKPTPEGDLE     | 11 | 1226.603 | sp P02754 LACB_BOVIN   | Beta-lactoglobulin | 61  | 71  | 190.88 | 18158000000 |
| KIIAEKTKIPAVF   | 13 | 1456.902 | sp P02754 LACB_BOVIN   | Beta-lactoglobulin | 86  | 98  | 190.53 | 1279000000  |
| VEELKPTPEGDLEIL | 15 | 1680.882 | sp P02754 LACB_BOVIN   | Beta-lactoglobulin | 59  | 73  | 184.24 | 39632000000 |
| HIRLSFNPTQLEEQ  | 14 | 1710.869 | sp P02754 LACB_BOVIN   | Beta-lactoglobulin | 162 | 175 | 182.23 | 70590000    |
| ELKPTPEGDLEIL   | 13 | 1452.771 | sp P02754 LACB_BOVIN   | Beta-lactoglobulin | 61  | 73  | 179.42 | 35195000000 |
| VEELKPTPEGDLEI  | 14 | 1567.798 | sp P02754 LACB_BOVIN   | Beta-lactoglobulin | 59  | 72  | 174.42 | 204970000   |
| DAQSAPLRVY      | 10 | 1118.572 | sp P02754 LACB_BOVIN   | Beta-lactoglobulin | 49  | 58  | 172.21 | 1084100000  |
| KIDALNENKVLVL   | 13 | 1467.866 | sp P02754 LACB_BOVIN   | Beta-lactoglobulin | 99  | 111 | 172    | 441680000   |
| LKPTPEGDLE      | 10 | 1097.561 | sp P02754 LACB_BOVIN   | Beta-lactoglobulin | 62  | 71  | 171.46 | 20258000000 |
| VRTPEVDDE       | 9  | 1058.488 | sp P02754 LACB_BOVIN   | Beta-lactoglobulin | 139 | 147 | 170.3  | 1064900000  |
| LIVTQTMKGLDIQ   | 13 | 1458.812 | sp P02754 LACB_BOVIN   | Beta-lactoglobulin | 17  | 29  | 168.22 | 605850000   |
| DTDYKKYL        | 8  | 1044.513 | sp P02754 LACB_BOVIN   | Beta-lactoglobulin | 112 | 119 | 166.05 | 9390600000  |
| LDTDYKKYL       | 9  | 1157.597 | sp P02754 LACB_BOVIN   | Beta-lactoglobulin | 111 | 119 | 165.72 | 131360000   |
| LVRTPEVDDEALEK  | 14 | 1612.831 | sp P02754 LACB_BOVIN   | Beta-lactoglobulin | 138 | 151 | 164.81 | 928670000   |
| HIRLSFNPT       | 9  | 1083.583 | sp P02754 LACB_BOVIN   | Beta-lactoglobulin | 162 | 170 | 163.9  | 1677200000  |
| RTPEVDDE        | 8  | 959.4196 | sp P02754 LACB_BOVIN   | Beta-lactoglobulin | 140 | 147 | 162.5  | 392240000   |
| SAEPEQSL        | 8  | 859.3923 | sp P02754 LACB_BOVIN   | Beta-lactoglobulin | 126 | 133 | 160.54 | 198460000   |
| NDSTEYGLF       | 9  | 1044.44  | sp P00711 LALBA_BOVINA | Alpha-lactalbumin  | 64  | 72  | 159.04 | 457130000   |

|                  |    |          |                                        |     |     |        |            |
|------------------|----|----------|----------------------------------------|-----|-----|--------|------------|
| ALNENKVL         | 8  | 899.5076 | sp P02754 LACB_BOVINBeta-lactoglobulin | 102 | 109 | 157.33 | 1623800000 |
| DIQKVAGTW        | 9  | 1016.529 | sp P02754 LACB_BOVINBeta-lactoglobulin | 27  | 35  | 157.2  | 4960800000 |
| LDTDYKKY         | 8  | 1044.513 | sp P02754 LACB_BOVINBeta-lactoglobulin | 111 | 118 | 156.4  | 599820000  |
| MENSAEPEQSL      | 11 | 1233.518 | sp P02754 LACB_BOVINBeta-lactoglobulin | 123 | 133 | 156.35 | 80972000   |
| EVFRELKDL        | 9  | 1147.624 | sp P00711 LALBA_BOVINAlpha-lactalbumin | 26  | 34  | 155.42 | 186370000  |
| IAEKTIPAVF       | 11 | 1215.723 | sp P02754 LACB_BOVINBeta-lactoglobulin | 88  | 98  | 154.85 | 611420000  |
| LSFNPTQLEE       | 10 | 1176.566 | sp P02754 LACB_BOVINBeta-lactoglobulin | 165 | 174 | 154.12 | 62575000   |
| EELKPTPEGDLEIL   | 14 | 1581.814 | sp P02754 LACB_BOVINBeta-lactoglobulin | 60  | 73  | 153.12 | 612050000  |
| ALEKFDKALKALPM   | 14 | 1573.89  | sp P02754 LACB_BOVINBeta-lactoglobulin | 148 | 161 | 151.79 | 147500000  |
| DTDYKKYLLF       | 10 | 1304.665 | sp P02754 LACB_BOVINBeta-lactoglobulin | 112 | 121 | 150.4  | 1062500000 |
| VFRELKDLKGY      | 11 | 1366.761 | sp P00711 LALBA_BOVINAlpha-lactalbumin | 27  | 37  | 150.08 | 2170500000 |
| DTDYKKYLL        | 9  | 1157.597 | sp P02754 LACB_BOVINBeta-lactoglobulin | 112 | 120 | 150.05 | 1213500000 |
| ELKPTPEGDLEI     | 12 | 1339.687 | sp P02754 LACB_BOVINBeta-lactoglobulin | 61  | 72  | 148.91 | 42689000   |
| GYDTQAIQNNNDSTE  | 15 | 1653.712 | sp P00711 LALBA_BOVINAlpha-lactalbumin | 54  | 68  | 147.62 | 90402000   |
| KTKIPAVF         | 8  | 902.5589 | sp P02754 LACB_BOVINBeta-lactoglobulin | 91  | 98  | 147.52 | 2052600000 |
| FNPTQLEEQ        | 9  | 1104.509 | sp P02754 LACB_BOVINBeta-lactoglobulin | 167 | 175 | 147.36 | 849890000  |
| VLDTDYKKY        | 9  | 1143.581 | sp P02754 LACB_BOVINBeta-lactoglobulin | 110 | 118 | 147.19 | 1258400000 |
| LSFNPTQL         | 8  | 918.4811 | sp P02754 LACB_BOVINBeta-lactoglobulin | 165 | 172 | 147.16 | 247790000  |
| GYDTQAIQVQ       | 9  | 993.4767 | sp P00711 LALBA_BOVINAlpha-lactalbumin | 54  | 62  | 144.83 | 4139200000 |
| GYDTQAIQNNNDSTEY | 16 | 1816.775 | sp P00711 LALBA_BOVINAlpha-lactalbumin | 54  | 69  | 143    | 81572000   |
| ENSAEPEQSL       | 10 | 1102.478 | sp P02754 LACB_BOVINBeta-lactoglobulin | 124 | 133 | 140.84 | 502450000  |
| VEELKPTPE        | 9  | 1040.539 | sp P02754 LACB_BOVINBeta-lactoglobulin | 59  | 67  | 140.14 | 5877700000 |
| EKFDKALKALPM     | 12 | 1389.769 | sp P02754 LACB_BOVINBeta-lactoglobulin | 150 | 161 | 139.86 | 37830000   |
| VEELKPTPEGD      | 11 | 1212.587 | sp P02754 LACB_BOVINBeta-lactoglobulin | 59  | 69  | 139.38 | 523720000  |
| IIAEKTKIPAVF     | 12 | 1328.807 | sp P02754 LACB_BOVINBeta-lactoglobulin | 87  | 98  | 138.22 | 2765100000 |

|               |    |          |                                        |     |     |        |            |
|---------------|----|----------|----------------------------------------|-----|-----|--------|------------|
| LVRTPEVDDEALE | 13 | 1484.736 | sp P02754 LACB_BOVINBeta-lactoglobulin | 138 | 150 | 138.22 | 2152600000 |
| ILDKVGIN      | 8  | 870.5175 | sp P00711 LALBA_BOVINAlpha-lactalbumin | 114 | 121 | 137.62 | 142800000  |
| EKTKIPAVF     | 9  | 1031.602 | sp P02754 LACB_BOVINBeta-lactoglobulin | 90  | 98  | 134.48 | 1466100000 |
| KPTPEGDLE     | 9  | 984.4764 | sp P02754 LACB_BOVINBeta-lactoglobulin | 63  | 71  | 133.55 | 84138000   |
| NNDSTEYGLF    | 10 | 1158.483 | sp P00711 LALBA_BOVINAlpha-lactalbumin | 63  | 72  | 133.12 | 4678800000 |
| VRTPEVDDEALE  | 12 | 1371.652 | sp P02754 LACB_BOVINBeta-lactoglobulin | 139 | 150 | 132.88 | 2307900000 |
| KDLKGYGGV     | 9  | 935.5076 | sp P00711 LALBA_BOVINAlpha-lactalbumin | 32  | 40  | 132.76 | 121220000  |
| LQKWENGE      | 8  | 1002.477 | sp P02754 LACB_BOVINBeta-lactoglobulin | 74  | 81  | 132.57 | 119950000  |
| FRELKDLKGY    | 10 | 1267.693 | sp P00711 LALBA_BOVINAlpha-lactalbumin | 28  | 37  | 131.83 | 25359000   |
| KILDKVGINYWLA | 13 | 1531.876 | sp P00711 LALBA_BOVINAlpha-lactalbumin | 113 | 125 | 131.43 | 32003000   |
| ILDKVGINY     | 9  | 1033.581 | sp P00711 LALBA_BOVINAlpha-lactalbumin | 114 | 122 | 131.41 | 1674300000 |
| LVRTPEVDDEAL  | 12 | 1355.693 | sp P02754 LACB_BOVINBeta-lactoglobulin | 138 | 149 | 130.66 | 3340000000 |
| LIVTQTMKGL    | 10 | 1102.642 | sp P02754 LACB_BOVINBeta-lactoglobulin | 17  | 26  | 128.69 | 1550900000 |
| ELKPTPEGD     | 9  | 984.4764 | sp P02754 LACB_BOVINBeta-lactoglobulin | 61  | 69  | 128.61 | 197410000  |
| NENKVLVL      | 8  | 927.5389 | sp P02754 LACB_BOVINBeta-lactoglobulin | 104 | 111 | 128.57 | 841600000  |
| DIQKVAGTWY    | 10 | 1179.592 | sp P02754 LACB_BOVINBeta-lactoglobulin | 27  | 36  | 128.38 | 972760000  |
| AEKTKIPAVF    | 10 | 1102.639 | sp P02754 LACB_BOVINBeta-lactoglobulin | 89  | 98  | 126.31 | 620890000  |
| MAASDISLL     | 9  | 919.4685 | sp P02754 LACB_BOVINBeta-lactoglobulin | 40  | 48  | 126.24 | 2964000000 |
| DKALKALPM     | 9  | 985.563  | sp P02754 LACB_BOVINBeta-lactoglobulin | 153 | 161 | 125.31 | 9500000000 |
| FNPTQLEE      | 8  | 976.4502 | sp P02754 LACB_BOVINBeta-lactoglobulin | 167 | 174 | 124.59 | 259860000  |
| AMAASDISLL    | 10 | 990.5056 | sp P02754 LACB_BOVINBeta-lactoglobulin | 39  | 48  | 124.37 | 308820000  |
| DIQKVAGTWYSL  | 12 | 1379.709 | sp P02754 LACB_BOVINBeta-lactoglobulin | 27  | 38  | 123.79 | 112050000  |
| AMAASDISLLDAQ | 13 | 1304.628 | sp P02754 LACB_BOVINBeta-lactoglobulin | 39  | 51  | 122.94 | 334370000  |
| LVRTPEVDDEA   | 11 | 1242.609 | sp P02754 LACB_BOVINBeta-lactoglobulin | 138 | 148 | 120.45 | 111560000  |
| NSAEPEQSLA    | 10 | 1044.472 | sp P02754 LACB_BOVINBeta-lactoglobulin | 125 | 134 | 118.5  | 304160000  |



|                |    |          |                                        |     |     |        |             |
|----------------|----|----------|----------------------------------------|-----|-----|--------|-------------|
| KVAGTWYSL      | 9  | 1023.539 | sp P02754 LACB_BOVINBeta-lactoglobulin | 30  | 38  | 118.32 | 3396300000  |
| VEELKPTPEG     | 10 | 1097.561 | sp P02754 LACB_BOVINBeta-lactoglobulin | 59  | 68  | 117.89 | 50049000    |
| LKPTPEGDLEIL   | 12 | 1323.729 | sp P02754 LACB_BOVINBeta-lactoglobulin | 62  | 73  | 115.82 | 153650000   |
| VFRELKDLKGYGGV | 14 | 1579.872 | sp P00711 LALBA_BOVINAlpha-lactalbumin | 27  | 40  | 115.82 | 28165000    |
| KKIIAEKTKIPAVF | 14 | 1584.997 | sp P02754 LACB_BOVINBeta-lactoglobulin | 85  | 98  | 113.69 | 280880000   |
| LVLDTDYKKY     | 10 | 1256.665 | sp P02754 LACB_BOVINBeta-lactoglobulin | 109 | 118 | 113.22 | 527300000   |
| VEELKPTPEGDL   | 12 | 1325.672 | sp P02754 LACB_BOVINBeta-lactoglobulin | 59  | 70  | 111.86 | 310780000   |
| KKILDKVGIN     | 10 | 1126.707 | sp P00711 LALBA_BOVINAlpha-lactalbumin | 112 | 121 | 111.61 | 329390000   |
| DAQSAPLRVYVE   | 12 | 1346.683 | sp P02754 LACB_BOVINBeta-lactoglobulin | 49  | 60  | 110.93 | 84459000    |
| DDLTDIM        | 8  | 936.3746 | sp P00711 LALBA_BOVINAlpha-lactalbumin | 102 | 109 | 110.36 | 31779000    |
| DIQKVAGT       | 8  | 830.4498 | sp P02754 LACB_BOVINBeta-lactoglobulin | 27  | 34  | 110.12 | 4026300000  |
| ALEKFDKAL      | 9  | 1033.581 | sp P02754 LACB_BOVINBeta-lactoglobulin | 148 | 156 | 109.44 | 37870000    |
| RELKDLKGY      | 9  | 1120.624 | sp P00711 LALBA_BOVINAlpha-lactalbumin | 29  | 37  | 108.74 | 352960000   |
| LSFNPTQLEEQ    | 11 | 1304.625 | sp P02754 LACB_BOVINBeta-lactoglobulin | 165 | 175 | 108.57 | 494780000   |
| YWLAHKAL       | 8  | 1000.549 | sp P00711 LALBA_BOVINAlpha-lactalbumin | 122 | 129 | 107.74 | 2127500000  |
| GYDTQAIQVN     | 10 | 1107.52  | sp P00711 LALBA_BOVINAlpha-lactalbumin | 54  | 63  | 107.29 | 167620000   |
| FHTSGYDTQAIQVQ | 13 | 1465.684 | sp P00711 LALBA_BOVINAlpha-lactalbumin | 50  | 62  | 107.08 | 75543000    |
| LDKVGINY       | 8  | 920.4967 | sp P00711 LALBA_BOVINAlpha-lactalbumin | 115 | 122 | 105.81 | 81335000    |
| MAASDISLLDAQ   | 12 | 1233.591 | sp P02754 LACB_BOVINBeta-lactoglobulin | 40  | 51  | 103.87 | 306620000   |
| KFDKALKAL      | 9  | 1032.633 | sp P02754 LACB_BOVINBeta-lactoglobulin | 151 | 159 | 103.82 | 213990000   |
| VKKILDKVGIN    | 11 | 1225.776 | sp P00711 LALBA_BOVINAlpha-lactalbumin | 111 | 121 | 103.46 | 1115400000  |
| ALNENKVLVL     | 10 | 1111.66  | sp P02754 LACB_BOVINBeta-lactoglobulin | 102 | 111 | 102.62 | 4471300000  |
| VRTPEVDDEAL    | 11 | 1242.609 | sp P02754 LACB_BOVINBeta-lactoglobulin | 139 | 149 | 102.61 | 515180000   |
| KFDKALKALPM    | 11 | 1260.726 | sp P02754 LACB_BOVINBeta-lactoglobulin | 151 | 161 | 101.3  | 23072000000 |
| YVEELKPTPEGDLE | 14 | 1617.777 | sp P02754 LACB_BOVINBeta-lactoglobulin | 58  | 71  | 100.69 | 23389000    |

|                     |    |          |                                         |     |     |        |           |
|---------------------|----|----------|-----------------------------------------|-----|-----|--------|-----------|
| DYKKYLLF            | 8  | 1088.591 | sp P02754 LACB_BOVINBeta-lactoglobulin  | 114 | 121 | 100.39 | 154540000 |
| GGVSLPEW            | 8  | 843.4127 | sp P00711 LALBA_BOVINAAlpha-lactalbumin | 38  | 45  | 99.279 | 29309000  |
| DKVGINYWLA          | 10 | 1177.613 | sp P00711 LALBA_BOVINAAlpha-lactalbumin | 116 | 125 | 98.033 | 42314000  |
| KFDKALKALPMHIR      | 14 | 1666.971 | sp P02754 LACB_BOVINBeta-lactoglobulin  | 151 | 164 | 97.551 | 630060000 |
| IIAEKTKIPAVFK       | 13 | 1456.902 | sp P02754 LACB_BOVINBeta-lactoglobulin  | 87  | 99  | 96.591 | 105530000 |
| KTKIPAVFK           | 9  | 1030.654 | sp P02754 LACB_BOVINBeta-lactoglobulin  | 91  | 99  | 96.331 | 220830000 |
| KTKIPAVFKI          | 10 | 1143.738 | sp P02754 LACB_BOVINBeta-lactoglobulin  | 91  | 100 | 96.171 | 74007000  |
| TDYKKYLL            | 8  | 1042.57  | sp P02754 LACB_BOVINBeta-lactoglobulin  | 113 | 120 | 95.909 | 131300000 |
| FDKALKALPM          | 10 | 1132.632 | sp P02754 LACB_BOVINBeta-lactoglobulin  | 152 | 161 | 95.608 | 703590000 |
| LVRTPEVDDEALEKF     | 15 | 1759.899 | sp P02754 LACB_BOVINBeta-lactoglobulin  | 138 | 152 | 95.428 | 165590000 |
| KILDKVGINYWLAHKA    | 16 | 1868.067 | sp P00711 LALBA_BOVINAAlpha-lactalbumin | 113 | 128 | 95.197 | 273720000 |
| GYDTQAIVQNNDSTEYGLF | 19 | 2133.949 | sp P00711 LALBA_BOVINAAlpha-lactalbumin | 54  | 72  | 94.767 | 11232000  |
| KFLDDDLTD           | 9  | 1080.498 | sp P00711 LALBA_BOVINAAlpha-lactalbumin | 98  | 106 | 92.439 | 131410000 |
| DKVGINYW            | 8  | 993.492  | sp P00711 LALBA_BOVINAAlpha-lactalbumin | 116 | 123 | 92.187 | 303720000 |
| VDDEALEKF           | 9  | 1064.503 | sp P02754 LACB_BOVINBeta-lactoglobulin  | 144 | 152 | 91.069 | 60384000  |
| KIDALNENKVL         | 11 | 1255.714 | sp P02754 LACB_BOVINBeta-lactoglobulin  | 99  | 109 | 90.964 | 46155000  |
| IIAEKTKIPA          | 10 | 1082.67  | sp P02754 LACB_BOVINBeta-lactoglobulin  | 87  | 96  | 89.886 | 245130000 |
| QNNDSTEYGLF         | 11 | 1286.542 | sp P00711 LALBA_BOVINAAlpha-lactalbumin | 62  | 72  | 89.355 | 13465000  |
| MENSAEPEQS          | 10 | 1120.434 | sp P02754 LACB_BOVINBeta-lactoglobulin  | 123 | 132 | 88.921 | 6073700   |
| TDYKKYLLF           | 9  | 1189.638 | sp P02754 LACB_BOVINBeta-lactoglobulin  | 113 | 121 | 88.819 | 98920000  |
| LVLDTDYKKYL         | 11 | 1369.749 | sp P02754 LACB_BOVINBeta-lactoglobulin  | 109 | 119 | 87.789 | 94096000  |
| RVYVEELKPTPEGDLEIL  | 18 | 2099.115 | sp P02754 LACB_BOVINBeta-lactoglobulin  | 56  | 73  | 87.287 | 44283000  |
| KALPMHIRL           | 9  | 1077.648 | sp P02754 LACB_BOVINBeta-lactoglobulin  | 157 | 165 | 85.67  | 68847000  |
| AASDISLL            | 8  | 788.428  | sp P02754 LACB_BOVINBeta-lactoglobulin  | 41  | 48  | 85.061 | 41411000  |
| RTPEVDDEALEK        | 12 | 1400.678 | sp P02754 LACB_BOVINBeta-lactoglobulin  | 140 | 151 | 79.886 | 20558000  |

|                           |    |          |                                        |     |     |        |            |
|---------------------------|----|----------|----------------------------------------|-----|-----|--------|------------|
| LVLDTDYKKYLL              | 12 | 1482.833 | sp P02754 LACB_BOVINBeta-lactoglobulin | 109 | 120 | 79.82  | 45685000   |
| TMKGLDIQ                  | 8  | 904.4688 | sp P02754 LACB_BOVINBeta-lactoglobulin | 22  | 29  | 79.596 | 808580000  |
| KALPMHIR                  | 8  | 964.564  | sp P02754 LACB_BOVINBeta-lactoglobulin | 157 | 164 | 79.451 | 41785000   |
| KILDKVGI                  | 8  | 884.5695 | sp P00711 LALBA_BOVINAlpha-lactalbumin | 113 | 120 | 78.377 | 48000000   |
| LVRTPEVDD                 | 9  | 1042.53  | sp P02754 LACB_BOVINBeta-lactoglobulin | 138 | 146 | 78.334 | 46552000   |
| RTPEVDDEALE               | 11 | 1272.583 | sp P02754 LACB_BOVINBeta-lactoglobulin | 140 | 150 | 78.098 | 1708500000 |
| KILDKVGINYWLAHK           | 15 | 1797.03  | sp P00711 LALBA_BOVINAlpha-lactalbumin | 113 | 127 | 76.82  | 1311500000 |
| VLDTDYKKYL                | 10 | 1256.665 | sp P02754 LACB_BOVINBeta-lactoglobulin | 110 | 119 | 76.465 | 2751100000 |
| ILDKVGINYW                | 10 | 1219.66  | sp P00711 LALBA_BOVINAlpha-lactalbumin | 114 | 123 | 76.17  | 8616600    |
| MENSAEPE                  | 8  | 905.3437 | sp P02754 LACB_BOVINBeta-lactoglobulin | 123 | 130 | 76.035 | 4868200    |
| IRLSFNPT                  | 8  | 946.5236 | sp P02754 LACB_BOVINBeta-lactoglobulin | 163 | 170 | 74.929 | 1181800000 |
| TMKGLDIQKVA               | 11 | 1202.669 | sp P02754 LACB_BOVINBeta-lactoglobulin | 22  | 32  | 74.611 | 24180000   |
| LVRTPEVD                  | 8  | 927.5026 | sp P02754 LACB_BOVINBeta-lactoglobulin | 138 | 145 | 73.26  | 60231000   |
| HIRLSFNPTQL               | 11 | 1324.725 | sp P02754 LACB_BOVINBeta-lactoglobulin | 162 | 172 | 73.067 | 53148000   |
| HTSGYDTQ                  | 8  | 907.3672 | sp P00711 LALBA_BOVINAlpha-lactalbumin | 51  | 58  | 73.039 | 6399200    |
| KDLKGYGG                  | 8  | 836.4392 | sp P00711 LALBA_BOVINAlpha-lactalbumin | 32  | 39  | 72.789 | 5161000    |
| IVQNNDSTE                 | 9  | 1018.457 | sp P00711 LALBA_BOVINAlpha-lactalbumin | 60  | 68  | 72.138 | 55968000   |
| AEPEQSLA                  | 8  | 843.3974 | sp P02754 LACB_BOVINBeta-lactoglobulin | 127 | 134 | 69.628 | 10206000   |
| IQKVAGTW                  | 8  | 901.5022 | sp P02754 LACB_BOVINBeta-lactoglobulin | 28  | 35  | 68.787 | 39736000   |
| VFRELKDL                  | 8  | 1018.581 | sp P00711 LALBA_BOVINAlpha-lactalbumin | 27  | 34  | 68.224 | 542970000  |
| SFNPTQLEEQ                | 10 | 1191.541 | sp P02754 LACB_BOVINBeta-lactoglobulin | 166 | 175 | 67.414 | 53742000   |
| GINYWLAH                  | 8  | 972.4818 | sp P00711 LALBA_BOVINAlpha-lactalbumin | 119 | 126 | 67.285 | 7934000    |
| LKPTPEGDLEI               | 11 | 1210.645 | sp P02754 LACB_BOVINBeta-lactoglobulin | 62  | 72  | 66.568 | 421770000  |
| NSAEPEQS                  | 8  | 860.3512 | sp P02754 LACB_BOVINBeta-lactoglobulin | 125 | 132 | 66.457 | 28267000   |
| VEELKPTPEGDLEILLQKWENGECA | 25 | 2839.395 | sp P02754 LACB_BOVINBeta-lactoglobulin | 59  | 83  | 66.387 | 53169000   |

|                 |    |          |                                        |     |     |        |            |
|-----------------|----|----------|----------------------------------------|-----|-----|--------|------------|
| LIVTQTMK        | 8  | 932.5365 | sp P02754 LACB_BOVINBeta-lactoglobulin | 17  | 24  | 65.313 | 43958000   |
| VDDEALEK        | 8  | 917.4342 | sp P02754 LACB_BOVINBeta-lactoglobulin | 144 | 151 | 63.673 | 237020000  |
| DAQSAPLR        | 8  | 856.4403 | sp P02754 LACB_BOVINBeta-lactoglobulin | 49  | 56  | 63.21  | 19121000   |
| ASDISLLDAQ      | 10 | 1031.514 | sp P02754 LACB_BOVINBeta-lactoglobulin | 42  | 51  | 62.969 | 16062000   |
| EKFDKALK        | 8  | 977.5546 | sp P02754 LACB_BOVINBeta-lactoglobulin | 150 | 157 | 59.35  | 67393000   |
| KVAGTWYSLA      | 10 | 1094.576 | sp P02754 LACB_BOVINBeta-lactoglobulin | 30  | 39  | 59.245 | 595890000  |
| ALPMHIRL        | 8  | 949.5531 | sp P02754 LACB_BOVINBeta-lactoglobulin | 158 | 165 | 57.281 | 123790000  |
| LKPTPEGDL       | 9  | 968.5179 | sp P02754 LACB_BOVINBeta-lactoglobulin | 62  | 70  | 56.258 | 30653000   |
| KIDALNENK       | 9  | 1043.561 | sp P02754 LACB_BOVINBeta-lactoglobulin | 99  | 107 | 55.064 | 4888600    |
| FHTSGYDTQ       | 9  | 1054.436 | sp P00711 LALBA_BOVINAlpha-lactalbumin | 50  | 58  | 54.205 | 223640000  |
| VRTPEVDD        | 8  | 929.4454 | sp P02754 LACB_BOVINBeta-lactoglobulin | 139 | 146 | 54.157 | 4015000    |
| EVDDEALE        | 8  | 918.3818 | sp P02754 LACB_BOVINBeta-lactoglobulin | 143 | 150 | 54.056 | 17499000   |
| KTKIPAVFKID     | 11 | 1258.765 | sp P02754 LACB_BOVINBeta-lactoglobulin | 91  | 101 | 54.005 | 1131300000 |
| TPEVDDEALE      | 10 | 1116.482 | sp P02754 LACB_BOVINBeta-lactoglobulin | 141 | 150 | 53.878 | 63329000   |
| YGLFQINNK       | 9  | 1095.571 | sp P00711 LALBA_BOVINAlpha-lactalbumin | 69  | 77  | 52.403 | 636780000  |
| DSTEYGLF        | 8  | 930.3971 | sp P00711 LALBA_BOVINAlpha-lactalbumin | 65  | 72  | 52.299 | 339840000  |
| ENSAEPEQS       | 9  | 989.3938 | sp P02754 LACB_BOVINBeta-lactoglobulin | 124 | 132 | 51.193 | 16462000   |
| KALCSEKL        | 8  | 890.4895 | sp P00711 LALBA_BOVINAlpha-lactalbumin | 127 | 134 | 49.536 | 10983000   |
| DIMCVKKILDKVGIN | 15 | 1687.937 | sp P00711 LALBA_BOVINAlpha-lactalbumin | 107 | 121 | 48.284 | 52221000   |
| KPTPEGDLEIL     | 11 | 1210.645 | sp P02754 LACB_BOVINBeta-lactoglobulin | 63  | 73  | 48.091 | 116020000  |
| KGYGVSLEPE      | 10 | 1005.513 | sp P00711 LALBA_BOVINAlpha-lactalbumin | 35  | 44  | 47.869 | 171700000  |
| KIDALNEN        | 8  | 915.4662 | sp P02754 LACB_BOVINBeta-lactoglobulin | 99  | 106 | 47.657 | 64359000   |
| EELKPTPEGDLE    | 12 | 1355.646 | sp P02754 LACB_BOVINBeta-lactoglobulin | 60  | 71  | 46.462 | 51591000   |
| TKIPAVFK        | 8  | 902.5589 | sp P02754 LACB_BOVINBeta-lactoglobulin | 92  | 99  | 45.335 | 38149000   |
| KPTPEGDLEILL    | 12 | 1323.729 | sp P02754 LACB_BOVINBeta-lactoglobulin | 63  | 74  | 45.137 | 42727000   |

|                |    |          |                                        |     |     |        |           |
|----------------|----|----------|----------------------------------------|-----|-----|--------|-----------|
| ALTCGAQALI     | 10 | 959.511  | sp P02754 LACB_BOVINBeta-lactoglobulin | 9   | 18  | 44.447 | 460370000 |
| KDLKGYGGVSLPE  | 13 | 1361.719 | sp P00711 LALBA_BOVINAlpha-lactalbumin | 32  | 44  | 42.19  | 15468000  |
| IMCVKKILDKVGIN | 14 | 1572.91  | sp P00711 LALBA_BOVINAlpha-lactalbumin | 108 | 121 | 41.704 | 43392000  |
| EQLTKCEVFREL   | 12 | 1493.755 | sp P00711 LALBA_BOVINAlpha-lactalbumin | 20  | 31  | 37.144 | 12815000  |
| LALTCGAQAL     | 10 | 959.511  | sp P02754 LACB_BOVINBeta-lactoglobulin | 8   | 17  | 36.395 | 132170000 |
| KKILDKVGINY    | 11 | 1289.771 | sp P00711 LALBA_BOVINAlpha-lactalbumin | 112 | 122 | 33.87  | 51044000  |

**Table S5: B-cell linear epitope database of ALA and BLG.**

| Object Type    | Name                                                          | Source Molecule                                      | Molecule Parent |
|----------------|---------------------------------------------------------------|------------------------------------------------------|-----------------|
| Linear peptide | KCEVFRELKDLKGY                                                | Alpha-lactalbumin precursor                          | Bos d 4         |
| Linear peptide | KDLKGYGGVS                                                    | Alpha-lactalbumin precursor                          | Bos d 4         |
| Linear peptide | ALCSEKLDQWLCEKL + MCM (C3, C12)                               | Alpha-lactalbumin precursor                          | Bos d 4         |
| Linear peptide | GYGGVSLPEWVCTTFHTSGYDTQAIVQNNDSTEYGLFQINNK + MCM (C12)        | Alpha-lactalbumin precursor                          | Bos d 4         |
| Linear peptide | IWCKDDQNPSSNICNISCDKFLDDDLTDDIMCVK + MCM (C3, C15, C19, C33)  | Alpha-lactalbumin precursor                          | Bos d 4         |
| Linear peptide | IWCKDDQNPSSNICNISCDKFLDDDLTDDIMCVKK + MCM (C3, C15, C19, C33) | Alpha-lactalbumin precursor                          | Bos d 4         |
| Linear peptide | VGINYWLAHK                                                    | Chain A, Anomalous Substructure of Alpha-Lactalbumin | Bos d 4         |
| Linear peptide | CDKFLDDDLT                                                    | Chain A, Anomalous Substructure of Alpha-Lactalbumin | Bos d 4         |
| Linear peptide | CNISCDFLD                                                     | Chain A, Anomalous Substructure of Alpha-Lactalbumin | Bos d 4         |
| Linear peptide | CVKKILDKVG                                                    | Chain A, Anomalous Substructure of Alpha-Lactalbumin | Bos d 4         |
| Linear peptide | DDIMCVKKIL                                                    | Chain A, Anomalous Substructure of Alpha-Lactalbumin | Bos d 4         |

|                |            |                                                      |         |
|----------------|------------|------------------------------------------------------|---------|
| Linear peptide | DDLTDDIMCV | Chain A, Anomalous Substructure of Alpha-Lactalbumin | Bos d 4 |
| Linear peptide | DKVGINYWLA | Chain A, Anomalous Substructure of Alpha-Lactalbumin | Bos d 4 |
| Linear peptide | DTQAIVQNND | Chain A, Anomalous Substructure of Alpha-Lactalbumin | Bos d 4 |
| Linear peptide | ELKDLKGYGG | Chain A, Anomalous Substructure of Alpha-Lactalbumin | Bos d 4 |
| Linear peptide | EQLTKCEVFR | Chain A, Anomalous Substructure of Alpha-Lactalbumin | Bos d 4 |
| Linear peptide | EVFRELKDLK | Chain A, Anomalous Substructure of Alpha-Lactalbumin | Bos d 4 |
| Linear peptide | EYGLFQINNK | Chain A, Anomalous Substructure of Alpha-Lactalbumin | Bos d 4 |
| Linear peptide | FQINNKIWCK | Chain A, Anomalous Substructure of Alpha-Lactalbumin | Bos d 4 |
| Linear peptide | FRELKDLKGY | Chain A, Anomalous Substructure of Alpha-Lactalbumin | Bos d 4 |
| Linear peptide | GLFQINNKIW | Chain A, Anomalous Substructure of Alpha-Lactalbumin | Bos d 4 |
| Linear peptide | GYDTQAIVQN | Chain A, Anomalous Substructure of Alpha-Lactalbumin | Bos d 4 |
| Linear peptide | GYGGVSLPEW | Chain A, Anomalous Substructure of Alpha-Lactalbumin | Bos d 4 |
| Linear peptide | ILDKVGINYW | Chain A, Anomalous Substructure of Alpha-Lactalbumin | Bos d 4 |

|                |            |                                                      |         |
|----------------|------------|------------------------------------------------------|---------|
| Linear peptide | IMCVKKILDK | Chain A, Anomalous Substructure of Alpha-Lactalbumin | Bos d 4 |
| Linear peptide | INYWLAHKAL | Chain A, Anomalous Substructure of Alpha-Lactalbumin | Bos d 4 |
| Linear peptide | ISCDKFLDDD | Chain A, Anomalous Substructure of Alpha-Lactalbumin | Bos d 4 |
| Linear peptide | KCEVFRELKD | Chain A, Anomalous Substructure of Alpha-Lactalbumin | Bos d 4 |
| Linear peptide | KFLDDDLTDD | Chain A, Anomalous Substructure of Alpha-Lactalbumin | Bos d 4 |
| Linear peptide | KKILDKVGIN | Chain A, Anomalous Substructure of Alpha-Lactalbumin | Bos d 4 |
| Linear peptide | LDDDLTDDIM | Chain A, Anomalous Substructure of Alpha-Lactalbumin | Bos d 4 |
| Linear peptide | LKGYGGVSLP | Chain A, Anomalous Substructure of Alpha-Lactalbumin | Bos d 4 |
| Linear peptide | LTDDIMCVKK | Chain A, Anomalous Substructure of Alpha-Lactalbumin | Bos d 4 |
| Linear peptide | LTKCEVFREL | Chain A, Anomalous Substructure of Alpha-Lactalbumin | Bos d 4 |
| Linear peptide | NDSTEYGLFQ | Chain A, Anomalous Substructure of Alpha-Lactalbumin | Bos d 4 |
| Linear peptide | NICNISCDKF | Chain A, Anomalous Substructure of Alpha-Lactalbumin | Bos d 4 |
| Linear peptide | PHSSNICNIS | Chain A, Anomalous Substructure of Alpha-Lactalbumin | Bos d 4 |



|                |                 |                                                      |         |
|----------------|-----------------|------------------------------------------------------|---------|
| Linear peptide | SSNICNISCD      | Chain A, Anomalous Substructure of Alpha-Lactalbumin | Bos d 4 |
| Linear peptide | STEYGLFQIN      | Chain A, Anomalous Substructure of Alpha-Lactalbumin | Bos d 4 |
| Linear peptide | VSLPEWVCTT      | Chain A, Anomalous Substructure of Alpha-Lactalbumin | Bos d 4 |
| Linear peptide | YWLAHKALCS      | Chain A, Anomalous Substructure of Alpha-Lactalbumin | Bos d 4 |
| Linear peptide | LKGYGGVSLPEW    | Alpha-lactalbumin precursor                          | Bos d 4 |
| Linear peptide | MCVKKILDKVGI    | Alpha-lactalbumin precursor                          | Bos d 4 |
| Linear peptide | STEYGLFQINNK    | Alpha-lactalbumin precursor                          | Bos d 4 |
| Linear peptide | TKCEVFRELKDL    | Alpha-lactalbumin precursor                          | Bos d 4 |
| Linear peptide | AHKALCSEKLDQWLC | alpha-lactalbumin precursor protein                  | Bos d 4 |
| Linear peptide | CEVFRELKDLKGYGG | Alpha-lactalbumin precursor                          | Bos d 4 |
| Linear peptide | CKDDQNPSSNICNI  | alpha-lactalbumin precursor protein                  | Bos d 4 |
| Linear peptide | CSEKLDQWLCEKL   | alpha-lactalbumin precursor protein                  | Bos d 4 |
| Linear peptide | CVKKILDKVGINYWL | alpha-lactalbumin precursor protein                  | Bos d 4 |

|                |                 |                                     |         |
|----------------|-----------------|-------------------------------------|---------|
| Linear peptide | DSTEYGLFQINNKIW | alpha-lactalbumin precursor protein | Bos d 4 |
| Linear peptide | ELKDLKGYGGVSLPE | Alpha-lactalbumin precursor         | Bos d 4 |
| Linear peptide | EQLTKCEVFRELKDL | Alpha-lactalbumin precursor         | Bos d 4 |
| Linear peptide | FHTSGYDTQAIVQNN | alpha-lactalbumin precursor protein | Bos d 4 |
| Linear peptide | GLFQINNKIWCKDDQ | alpha-lactalbumin precursor protein | Bos d 4 |
| Linear peptide | INYWLAHKALCSEKL | alpha-lactalbumin precursor protein | Bos d 4 |
| Linear peptide | IVQNNDSTEYGLFQI | alpha-lactalbumin precursor protein | Bos d 4 |
| Linear peptide | KGYGGVSLPEWVCTT | Alpha-lactalbumin precursor         | Bos d 4 |
| Linear peptide | LDDDLTDDIMCVKKI | alpha-lactalbumin precursor protein | Bos d 4 |
| Linear peptide | LDKVGINYWLAHKAL | alpha-lactalbumin precursor protein | Bos d 4 |
| Linear peptide | NICNISCDKFLDDDL | alpha-lactalbumin precursor protein | Bos d 4 |
| Linear peptide | NNKIWCKDDQNPHSS | alpha-lactalbumin precursor protein | Bos d 4 |
| Linear peptide | NPHSSNICNISCDKF | alpha-lactalbumin precursor protein | Bos d 4 |

|                |                    |                                     |         |
|----------------|--------------------|-------------------------------------|---------|
| Linear peptide | SCDKFLDDDLTDDIM    | alpha-lactalbumin precursor protein | Bos d 4 |
| Linear peptide | TDDIMCVKKILDKVG    | alpha-lactalbumin precursor protein | Bos d 4 |
| Linear peptide | VSLPEWVCTTFHTSG    | Alpha-lactalbumin precursor         | Bos d 4 |
| Linear peptide | WVCTTFHTSGYDTQA    | Alpha-lactalbumin precursor         | Bos d 4 |
| Linear peptide | YDTQAIVQNNDSTEY    | alpha-lactalbumin precursor protein | Bos d 4 |
| Linear peptide | DDQNPHSSNICNISC DK | alpha-lactalbumin precursor protein | Bos d 4 |
| Linear peptide | FLDDDLTDDIMCVK     | alpha-lactalbumin precursor protein | Bos d 4 |
| Linear peptide | AASDISLLDAQSAPLR   | Beta-lactoglobulin precursor        | Bos d 5 |
| Linear peptide | AQKKIIAEKT         | Beta-lactoglobulin precursor        | Bos d 5 |
| Linear peptide | AQKKIIAEKTKI       | Beta-lactoglobulin precursor        | Bos d 5 |
| Linear peptide | EVDDEALEKF         | Beta-lactoglobulin precursor        | Bos d 5 |
| Linear peptide | EVDDEALEKFDKAL     | Beta-lactoglobulin precursor        | Bos d 5 |
| Linear peptide | GLDIQK             | Beta-lactoglobulin precursor        | Bos d 5 |

|                |                      |                              |         |
|----------------|----------------------|------------------------------|---------|
| Linear peptide | IDALNENK             | Beta-lactoglobulin precursor | Bos d 5 |
| Linear peptide | KALKALPMHI           | Beta-lactoglobulin precursor | Bos d 5 |
| Linear peptide | KALPMHIRLSFN         | Beta-lactoglobulin precursor | Bos d 5 |
| Linear peptide | KPTPEGDLEI           | Beta-lactoglobulin precursor | Bos d 5 |
| Linear peptide | KPTPEGDLEILLQK       | Beta-lactoglobulin precursor | Bos d 5 |
| Linear peptide | KTKIPAVFKI           | Beta-lactoglobulin precursor | Bos d 5 |
| Linear peptide | KTKIPAVFKIDA         | Beta-lactoglobulin precursor | Bos d 5 |
| Linear peptide | LIVTQTMK             | Beta-lactoglobulin precursor | Bos d 5 |
| Linear peptide | LIVTQTMKGLDIQK       | Beta-lactoglobulin precursor | Bos d 5 |
| Linear peptide | LSFNPTQLEEQCHI       | Beta-lactoglobulin precursor | Bos d 5 |
| Linear peptide | PAVFK                | Beta-lactoglobulin precursor | Bos d 5 |
| Linear peptide | RTPEVDDEALE          | Beta-lactoglobulin precursor | Bos d 5 |
| Linear peptide | RTPEVDDEALEKFDKALKAL | Beta-lactoglobulin precursor | Bos d 5 |

|                |                         |                                   |         |
|----------------|-------------------------|-----------------------------------|---------|
| Linear peptide | TPEVDDEALEK             | beta-lactoglobulin [Bos taurus]   | Bos d 5 |
| Linear peptide | TPEVDDEALEKFDK          | beta-lactoglobulin [Bos taurus]   | Bos d 5 |
| Linear peptide | VLVLDTDYK               | beta-lactoglobulin [Bos taurus]   | Bos d 5 |
| Linear peptide | VYVEELKPTP              | Beta-lactoglobulin precursor      | Bos d 5 |
| Linear peptide | VYVEELKPTPEGDLEILLQK    | Beta-lactoglobulin precursor      | Bos d 5 |
| Linear peptide | YLLFCMENSAPPEQSLVCQCLVR | beta-lactoglobulin                | Bos d 5 |
| Linear peptide | CLVRTPEVDDEALEKFDKAL    | major allergen beta-lactoglobulin | Bos d 5 |
| Linear peptide | LQKWENDECAQKKIIAEKTK    | major allergen beta-lactoglobulin | Bos d 5 |
| Linear peptide | TKIPAVFKIDALNENKVLVL    | major allergen beta-lactoglobulin | Bos d 5 |
| Linear peptide | AEPEQS                  | major allergen beta-lactoglobulin | Bos d 5 |
| Linear peptide | AQKKII                  | major allergen beta-lactoglobulin | Bos d 5 |
| Linear peptide | DALNEN                  | major allergen beta-lactoglobulin | Bos d 5 |
| Linear peptide | DALNENKVLVLD            | major allergen beta-lactoglobulin | Bos d 5 |

|                |              |                                   |         |
|----------------|--------------|-----------------------------------|---------|
| Linear peptide | DDEALE       | major allergen beta-lactoglobulin | Bos d 5 |
| Linear peptide | EALEKF       | major allergen beta-lactoglobulin | Bos d 5 |
| Linear peptide | EILLQK       | major allergen beta-lactoglobulin | Bos d 5 |
| Linear peptide | ENKVLV       | major allergen beta-lactoglobulin | Bos d 5 |
| Linear peptide | EVDDEA       | major allergen beta-lactoglobulin | Bos d 5 |
| Linear peptide | FCMENS       | major allergen beta-lactoglobulin | Bos d 5 |
| Linear peptide | FNPTQLEEQCHI | major allergen beta-lactoglobulin | Bos d 5 |
| Linear peptide | IIAEKT       | major allergen beta-lactoglobulin | Bos d 5 |
| Linear peptide | IRLSFN       | major allergen beta-lactoglobulin | Bos d 5 |
| Linear peptide | KIPAVF       | major allergen beta-lactoglobulin | Bos d 5 |
| Linear peptide | LACQCLVRTPEV | Beta-lactoglobulin precursor      | Bos d 5 |
| Linear peptide | LDTDYK       | major allergen beta-lactoglobulin | Bos d 5 |
| Linear peptide | LEKFDK       | major allergen beta-lactoglobulin | Bos d 5 |

|                |              |                                   |         |
|----------------|--------------|-----------------------------------|---------|
| Linear peptide | LLFCME       | major allergen beta-lactoglobulin | Bos d 5 |
| Linear peptide | LPMHIR       | major allergen beta-lactoglobulin | Bos d 5 |
| Linear peptide | LSFNPT       | major allergen beta-lactoglobulin | Bos d 5 |
| Linear peptide | LVLDTD       | major allergen beta-lactoglobulin | Bos d 5 |
| Linear peptide | MENSAE       | major allergen beta-lactoglobulin | Bos d 5 |
| Linear peptide | MHIRLS       | major allergen beta-lactoglobulin | Bos d 5 |
| Linear peptide | NDECAQ       | major allergen beta-lactoglobulin | Bos d 5 |
| Linear peptide | NSAEPE       | major allergen beta-lactoglobulin | Bos d 5 |
| Linear peptide | PEQSLA       | Beta-lactoglobulin precursor      | Bos d 5 |
| Linear peptide | QSAPLRVYVEEL | major allergen beta-lactoglobulin | Bos d 5 |
| Linear peptide | QSLACQ       | Beta-lactoglobulin precursor      | Bos d 5 |
| Linear peptide | TDYKKY       | major allergen beta-lactoglobulin | Bos d 5 |
| Linear peptide | TDYKKYLLFCME | major allergen beta-lactoglobulin | Bos d 5 |

|                |                 |                                   |         |
|----------------|-----------------|-----------------------------------|---------|
| Linear peptide | TPEVDD          | major allergen beta-lactoglobulin | Bos d 5 |
| Linear peptide | VAGTWYSLAMAA    | major allergen beta-lactoglobulin | Bos d 5 |
| Linear peptide | WENGECAQK       | Beta-lactoglobulin precursor      | Bos d 5 |
| Linear peptide | AEPEQSLACQCLVRT | Beta-lactoglobulin precursor      | Bos d 5 |
| Linear peptide | AGTWYSLAMAASDIS | Beta-lactoglobulin precursor      | Bos d 5 |
| Linear peptide | ALNENKVLVLDTDYK | Beta-lactoglobulin precursor      | Bos d 5 |
| Linear peptide | ASDISLLDAQSAPLR | Beta-lactoglobulin precursor      | Bos d 5 |
| Linear peptide | CAQKKIIAEKTKIPA | Beta-lactoglobulin precursor      | Bos d 5 |
| Linear peptide | CLVRTPEVDDEALEK | Beta-lactoglobulin precursor      | Bos d 5 |
| Linear peptide | CMENSAEPEQSLACQ | Beta-lactoglobulin precursor      | Bos d 5 |
| Linear peptide | DIQKVAGTWYSLAMA | Beta-lactoglobulin precursor      | Bos d 5 |
| Linear peptide | DTDYKKYLLFCMENS | Beta-lactoglobulin precursor      | Bos d 5 |
| Linear peptide | EALEKFDKALKALPM | Beta-lactoglobulin precursor      | Bos d 5 |



|                |                 |                                   |         |
|----------------|-----------------|-----------------------------------|---------|
| Linear peptide | FDKALKALPMHIRLS | Beta-lactoglobulin precursor      | Bos d 5 |
| Linear peptide | HIRLSFNPTQLEEQC | Beta-lactoglobulin precursor      | Bos d 5 |
| Linear peptide | IIAEKTKIPAVFKID | Beta-lactoglobulin precursor      | Bos d 5 |
| Linear peptide | ILLQKWENGECAQKK | Beta-lactoglobulin precursor      | Bos d 5 |
| Linear peptide | KALPMHIRLSFNPTQ | Beta-lactoglobulin precursor      | Bos d 5 |
| Linear peptide | KVLVLDTDYKKYLLF | Beta-lactoglobulin precursor      | Bos d 5 |
| Linear peptide | LIVTQTMKGLDIQKV | Beta-lactoglobulin precursor      | Bos d 5 |
| Linear peptide | LKPTPEGDLEILLQK | Beta-lactoglobulin precursor      | Bos d 5 |
| Linear peptide | LLDAQSAPLRVYVEE | Beta-lactoglobulin precursor      | Bos d 5 |
| Linear peptide | PEVDDEALEKFDKAL | Beta-lactoglobulin precursor      | Bos d 5 |
| Linear peptide | QKVAGTWYSLAMAAS | major allergen beta-lactoglobulin | Bos d 5 |
| Linear peptide | SAPLRVYVEELKPTP | Beta-lactoglobulin precursor      | Bos d 5 |
| Linear peptide | SLAMAASDISLLDAQ | Beta-lactoglobulin precursor      | Bos d 5 |

|                |                 |                              |         |
|----------------|-----------------|------------------------------|---------|
| Linear peptide | TKIPAVFKIDALNEN | Beta-lactoglobulin precursor | Bos d 5 |
| Linear peptide | TMKGLDIQKVAGTWY | Beta-lactoglobulin precursor | Bos d 5 |
| Linear peptide | VYVEELKPTPEGDLE | Beta-lactoglobulin precursor | Bos d 5 |
| Linear peptide | AASDISLLDA      | Beta-lactoglobulin precursor | Bos d 5 |
| Linear peptide | AEKTKIPAVF      | Beta-lactoglobulin precursor | Bos d 5 |
| Linear peptide | AEPEQSLACQ      | Beta-lactoglobulin precursor | Bos d 5 |
| Linear peptide | ALKALPMHIR      | Beta-lactoglobulin precursor | Bos d 5 |
| Linear peptide | AMAASDISLL      | Beta-lactoglobulin precursor | Bos d 5 |
| Linear peptide | APLRVYVEEL      | Beta-lactoglobulin precursor | Bos d 5 |
| Linear peptide | CLVRTPEVDD      | Beta-lactoglobulin precursor | Bos d 5 |
| Linear peptide | CQCLVRTPEV      | Beta-lactoglobulin precursor | Bos d 5 |
| Linear peptide | DALNENKVLV      | Beta-lactoglobulin precursor | Bos d 5 |
| Linear peptide | DAQSAPLRVY      | Beta-lactoglobulin precursor | Bos d 5 |

|                |            |                              |         |
|----------------|------------|------------------------------|---------|
| Linear peptide | DDEALEKFDK | Beta-lactoglobulin precursor | Bos d 5 |
| Linear peptide | DIQKVAGTWY | Beta-lactoglobulin precursor | Bos d 5 |
| Linear peptide | DKALKALPMH | Beta-lactoglobulin precursor | Bos d 5 |
| Linear peptide | DLEILLQKWE | Beta-lactoglobulin precursor | Bos d 5 |
| Linear peptide | EALEKFDKAL | Beta-lactoglobulin precursor | Bos d 5 |
| Linear peptide | EGDLEILLQK | Beta-lactoglobulin precursor | Bos d 5 |
| Linear peptide | ELKPTPEGDL | Beta-lactoglobulin precursor | Bos d 5 |
| Linear peptide | ENKVLVLDTD | Beta-lactoglobulin precursor | Bos d 5 |
| Linear peptide | FCMENSAEPE | Beta-lactoglobulin precursor | Bos d 5 |
| Linear peptide | FNPTQLEEQC | Beta-lactoglobulin precursor | Bos d 5 |
| Linear peptide | GLDIQKVAGT | Beta-lactoglobulin precursor | Bos d 5 |
| Linear peptide | IIAEKTIPA  | Beta-lactoglobulin precursor | Bos d 5 |
| Linear peptide | IRLSFNPTQL | Beta-lactoglobulin precursor | Bos d 5 |

|                |            |                              |         |
|----------------|------------|------------------------------|---------|
| Linear peptide | ISLLDAQSAP | Beta-lactoglobulin precursor | Bos d 5 |
| Linear peptide | KALPMHIRLS | Beta-lactoglobulin precursor | Bos d 5 |
| Linear peptide | KFDKALKALP | Beta-lactoglobulin precursor | Bos d 5 |
| Linear peptide | KIDALNENKV | Beta-lactoglobulin precursor | Bos d 5 |
| Linear peptide | KIPAVFKIDA | Beta-lactoglobulin precursor | Bos d 5 |
| Linear peptide | KKIIAEKTKI | Beta-lactoglobulin precursor | Bos d 5 |
| Linear peptide | LACQCLVRTP | Beta-lactoglobulin precursor | Bos d 5 |
| Linear peptide | LEKFDKALKA | Beta-lactoglobulin precursor | Bos d 5 |
| Linear peptide | LLDAQSAPLR | Beta-lactoglobulin precursor | Bos d 5 |
| Linear peptide | LNENKVLVLD | Beta-lactoglobulin precursor | Bos d 5 |
| Linear peptide | LPMHIRLSFN | Beta-lactoglobulin precursor | Bos d 5 |
| Linear peptide | LRVYVEELKP | Beta-lactoglobulin precursor | Bos d 5 |
| Linear peptide | LSFNPTQLEE | Beta-lactoglobulin precursor | Bos d 5 |

|                |            |                              |         |
|----------------|------------|------------------------------|---------|
| Linear peptide | LVLDTDYKKY | Beta-lactoglobulin precursor | Bos d 5 |
| Linear peptide | MENSAEPEQS | Beta-lactoglobulin precursor | Bos d 5 |
| Linear peptide | MHIRLSFNPT | Beta-lactoglobulin precursor | Bos d 5 |
| Linear peptide | MKGLDIQKVA | Beta-lactoglobulin precursor | Bos d 5 |
| Linear peptide | NSAEPEQSLA | Beta-lactoglobulin precursor | Bos d 5 |
| Linear peptide | PAVFKIDALN | Beta-lactoglobulin precursor | Bos d 5 |
| Linear peptide | PEQSLACQCL | Beta-lactoglobulin precursor | Bos d 5 |
| Linear peptide | QSAPLRVYVE | Beta-lactoglobulin precursor | Bos d 5 |
| Linear peptide | QSLACQCLVR | Beta-lactoglobulin precursor | Bos d 5 |
| Linear peptide | QTMKGLDIQK | Beta-lactoglobulin precursor | Bos d 5 |
| Linear peptide | SDISLLDAQS | Beta-lactoglobulin precursor | Bos d 5 |
| Linear peptide | SLAMAASDIS | Beta-lactoglobulin precursor | Bos d 5 |
| Linear peptide | TPEGDLEILL | Beta-lactoglobulin precursor | Bos d 5 |

|                |                      |                              |         |
|----------------|----------------------|------------------------------|---------|
| Linear peptide | VEELKPTPEG           | Beta-lactoglobulin precursor | Bos d 5 |
| Linear peptide | VFKIDALNEN           | Beta-lactoglobulin precursor | Bos d 5 |
| Linear peptide | VLDTDYKKYLLFCMENSAEP | Beta-lactoglobulin precursor | Bos d 5 |
| Linear peptide | VRTPEVDDEA           | Beta-lactoglobulin precursor | Bos d 5 |
| Linear peptide | VTQTMKGLDI           | Beta-lactoglobulin precursor | Bos d 5 |
| Linear peptide | WYSLAMAASD           | Beta-lactoglobulin precursor | Bos d 5 |
| Linear peptide | ACQCLVRTPEVDDEALEKFD | Beta-lactoglobulin precursor | Bos d 5 |
| Linear peptide | AEKTKIPAVFKIDALNENKV | Beta-lactoglobulin precursor | Bos d 5 |
| Linear peptide | ALPMHIRLSFNPTQLEEQCH | Beta-lactoglobulin precursor | Bos d 5 |
| Linear peptide | APLRVYVEELKPTPEGDLEI | Beta-lactoglobulin precursor | Bos d 5 |
| Linear peptide | AQKKIIAEKTKIPAVFKIDA | Beta-lactoglobulin precursor | Bos d 5 |
| Linear peptide | CMENSAEPEQSLACQCLVRT | Beta-lactoglobulin precursor | Bos d 5 |
| Linear peptide | DEALEKFDKALKALPMHIRL | Beta-lactoglobulin precursor | Bos d 5 |

|                |                      |                              |         |
|----------------|----------------------|------------------------------|---------|
| Linear peptide | DISLLDAQSAPLRVYVEELK | Beta-lactoglobulin precursor | Bos d 5 |
| Linear peptide | EILLQKWENG           | Beta-lactoglobulin precursor | Bos d 5 |
| Linear peptide | EVDDEALEKFDKALKALPMH | Beta-lactoglobulin precursor | Bos d 5 |
| Linear peptide | GDLEILLQKWENGECAQKKI | Beta-lactoglobulin precursor | Bos d 5 |
| Linear peptide | GTWYSLAMAA           | Beta-lactoglobulin precursor | Bos d 5 |
| Linear peptide | KIIAEKTKIPAVFKIDALNE | Beta-lactoglobulin precursor | Bos d 5 |
| Linear peptide | KKYLLFCMENSAPPEQSLAC | Beta-lactoglobulin precursor | Bos d 5 |
| Linear peptide | KYLLFCMENS           | Beta-lactoglobulin precursor | Bos d 5 |
| Linear peptide | LAMAASDISLLDAQSAPLRV | Beta-lactoglobulin precursor | Bos d 5 |
| Linear peptide | LDTDYKKYLL           | Beta-lactoglobulin precursor | Bos d 5 |
| Linear peptide | LEKFDKALKALPMHIRLSFN | Beta-lactoglobulin precursor | Bos d 5 |
| Linear peptide | LIVTQTMKGL           | Beta-lactoglobulin precursor | Bos d 5 |
| Linear peptide | LKPTPEGDLEILLQKWENGE | Beta-lactoglobulin precursor | Bos d 5 |

|                |                       |                              |         |
|----------------|-----------------------|------------------------------|---------|
| Linear peptide | LLFCMENSAE            | Beta-lactoglobulin precursor | Bos d 5 |
| Linear peptide | LLFCMENSAEPEQSLACQCL  | Beta-lactoglobulin precursor | Bos d 5 |
| Linear peptide | LLQKWENGEC            | Beta-lactoglobulin precursor | Bos d 5 |
| Linear peptide | MHIRLSFNPTQLEEQCHI    | Beta-lactoglobulin precursor | Bos d 5 |
| Linear peptide | PTQLEEQCHI            | Beta-lactoglobulin precursor | Bos d 5 |
| Linear peptide | QKVAGTWYSL            | Beta-lactoglobulin precursor | Bos d 5 |
| Linear peptide | QKWENGEC AQ           | Beta-lactoglobulin precursor | Bos d 5 |
| Linear peptide | RVYVEELKPTPEGDLEILLQ  | Beta-lactoglobulin precursor | Bos d 5 |
| Linear peptide | TPEGDLEILLQKWENGEC AQ | Beta-lactoglobulin precursor | Bos d 5 |
| Linear peptide | TPEVDDEALE            | Beta-lactoglobulin precursor | Bos d 5 |
| Linear peptide | VAGTWYSLAM            | Beta-lactoglobulin precursor | Bos d 5 |
| Linear peptide | VEELKPTPEGDLEILLQKWE  | Beta-lactoglobulin precursor | Bos d 5 |
| Linear peptide | WYSLAMAASDISLLDAQSAP  | Beta-lactoglobulin precursor | Bos d 5 |



|                |            |                              |         |
|----------------|------------|------------------------------|---------|
| Linear peptide | YKKYLLFCME | Beta-lactoglobulin precursor | Bos d 5 |
| Linear peptide | ALPMHIR    | beta-lactoglobulin           | Bos d 5 |

**Table S6:** Epitope peptides contained in whey protein hydrolysate.

| Sequence          | Length | Mass     | Leading razor protein                   | Start position | End position | Score  | Intensity  |
|-------------------|--------|----------|-----------------------------------------|----------------|--------------|--------|------------|
| KILDKVGINYWLAH    | 14     | 1668.935 | sp P00711 LALBA_BOVINAAlpha-lactalbumin | 113            | 126          | 277.28 | 1458100000 |
| EVFRELKDLKGY      | 12     | 1495.804 | sp P00711 LALBA_BOVINAAlpha-lactalbumin | 26             | 37           | 210.93 | 2092000000 |
| AIVQNNDSTEYGLFQ   | 15     | 1697.79  | sp P00711 LALBA_BOVINAAlpha-lactalbumin | 59             | 73           | 195.51 | 313370000  |
| LDKVGINYWLAH      | 12     | 1427.756 | sp P00711 LALBA_BOVINAAlpha-lactalbumin | 115            | 126          | 161.63 | 24129000   |
| KFLDDDLTDDIM      | 12     | 1439.649 | sp P00711 LALBA_BOVINAAlpha-lactalbumin | 98             | 109          | 153.05 | 122490000  |
| VFRELKDLKGY       | 11     | 1366.761 | sp P00711 LALBA_BOVINAAlpha-lactalbumin | 27             | 37           | 150.08 | 1014700000 |
| GYDTQAIVQNNDSTEY  | 16     | 1816.775 | sp P00711 LALBA_BOVINAAlpha-lactalbumin | 54             | 69           | 143    | 46927000   |
| KILDKVGINYW       | 11     | 1347.755 | sp P00711 LALBA_BOVINAAlpha-lactalbumin | 113            | 123          | 141.95 | 4062600000 |
| NNDSTEYGLFQ       | 11     | 1286.542 | sp P00711 LALBA_BOVINAAlpha-lactalbumin | 63             | 73           | 140.35 | 53123000   |
| KILDKVGINYWLA     | 13     | 1531.876 | sp P00711 LALBA_BOVINAAlpha-lactalbumin | 113            | 125          | 131.43 | 3862400000 |
| KILDKVGINYWL      | 12     | 1460.839 | sp P00711 LALBA_BOVINAAlpha-lactalbumin | 113            | 124          | 119.53 | 114520000  |
| KILDKVGINYWLAHKAL | 17     | 1981.151 | sp P00711 LALBA_BOVINAAlpha-lactalbumin | 113            | 129          | 115.87 | 1041700000 |
| VFRELKDLKGYGGV    | 14     | 1579.872 | sp P00711 LALBA_BOVINAAlpha-lactalbumin | 27             | 40           | 115.82 | 97571000   |
| LDDDLTDDIM        | 10     | 1164.486 | sp P00711 LALBA_BOVINAAlpha-lactalbumin | 100            | 109          | 112.17 | 45178000   |
| KKILDKVGIN        | 10     | 1126.707 | sp P00711 LALBA_BOVINAAlpha-lactalbumin | 112            | 121          | 111.61 | 297370000  |
| GYDTQAIVQN        | 10     | 1107.52  | sp P00711 LALBA_BOVINAAlpha-lactalbumin | 54             | 63           | 107.29 | 280710000  |
| VKKILDKVGIN       | 11     | 1225.776 | sp P00711 LALBA_BOVINAAlpha-lactalbumin | 111            | 121          | 103.46 | 144790000  |
| DKVGINYWLA        | 10     | 1177.613 | sp P00711 LALBA_BOVINAAlpha-lactalbumin | 116            | 125          | 98.033 | 194560000  |
| KILDKVGINYWLAHKA  | 16     | 1868.067 | sp P00711 LALBA_BOVINAAlpha-lactalbumin | 113            | 128          | 95.197 | 1481800000 |
| KILDKVGINYWLAHK   | 15     | 1797.03  | sp P00711 LALBA_BOVINAAlpha-lactalbumin | 113            | 127          | 76.82  | 7115900000 |
| ILDKVGINYW        | 10     | 1219.66  | sp P00711 LALBA_BOVINAAlpha-lactalbumin | 114            | 123          | 76.17  | 23809000   |

|                   |    |          |                        |                    |     |     |        |             |
|-------------------|----|----------|------------------------|--------------------|-----|-----|--------|-------------|
| KGYGGVSLPEW       | 11 | 1191.592 | sp P00711 LALBA_BOVINA | Alpha-lactalbumin  | 35  | 45  | 73.985 | 11754000    |
| DIMCVKKILDKVGIN   | 15 | 1687.937 | sp P00711 LALBA_BOVINA | Alpha-lactalbumin  | 107 | 121 | 48.284 | 84456000    |
| DTDYKKY           | 7  | 931.4287 | sp P02754 LACB_BOVIN   | Beta-lactoglobulin | 112 | 118 | 171.08 | 21178000000 |
| LSFNPT            | 6  | 677.3384 | sp P02754 LACB_BOVIN   | Beta-lactoglobulin | 165 | 170 | 150.06 | 10292000    |
| KIIAEKT           | 7  | 801.496  | sp P02754 LACB_BOVIN   | Beta-lactoglobulin | 86  | 92  | 143.61 | 76384000    |
| TDYKKY            | 6  | 816.4018 | sp P02754 LACB_BOVIN   | Beta-lactoglobulin | 113 | 118 | 130.84 | 428200000   |
| KIPAVF            | 6  | 673.4163 | sp P02754 LACB_BOVIN   | Beta-lactoglobulin | 93  | 98  | 113.63 | 33554000000 |
| AEPEQSL           | 7  | 772.3603 | sp P02754 LACB_BOVIN   | Beta-lactoglobulin | 127 | 133 | 107.74 | 333230000   |
| IIAEKT            | 6  | 673.401  | sp P02754 LACB_BOVIN   | Beta-lactoglobulin | 87  | 92  | 107.65 | 2472400000  |
| TKIPAVF           | 7  | 774.464  | sp P02754 LACB_BOVIN   | Beta-lactoglobulin | 92  | 98  | 105.2  | 14700000000 |
| GLDIQK            | 6  | 672.3806 | sp P02754 LACB_BOVIN   | Beta-lactoglobulin | 25  | 30  | 87.582 | 539450000   |
| VLDTDYK           | 7  | 852.4229 | sp P02754 LACB_BOVIN   | Beta-lactoglobulin | 110 | 116 | 86.866 | 2271600000  |
| LDTDYK            | 6  | 753.3545 | sp P02754 LACB_BOVIN   | Beta-lactoglobulin | 111 | 116 | 77.748 | 62388000    |
| LPMHIR            | 6  | 765.432  | sp P02754 LACB_BOVIN   | Beta-lactoglobulin | 159 | 164 | 76.553 | 68524000    |
| VDDEALE           | 7  | 789.3392 | sp P02754 LACB_BOVIN   | Beta-lactoglobulin | 144 | 150 | 68.485 | 2683100000  |
| MHIRLS            | 6  | 755.4112 | sp P02754 LACB_BOVIN   | Beta-lactoglobulin | 161 | 166 | 66.994 | 504490000   |
| DDEALEK           | 7  | 818.3658 | sp P02754 LACB_BOVIN   | Beta-lactoglobulin | 145 | 151 | 65.246 | 5077200     |
| ALPMHIR           | 7  | 836.4691 | sp P02754 LACB_BOVIN   | Beta-lactoglobulin | 158 | 164 | 62.978 | 873850000   |
| IIAEKTK           | 7  | 801.496  | sp P02754 LACB_BOVIN   | Beta-lactoglobulin | 87  | 93  | 54.205 | 20008000    |
| NSAEPEQSL         | 9  | 973.4353 | sp P02754 LACB_BOVIN   | Beta-lactoglobulin | 125 | 133 | 256.48 | 5850900000  |
| VEELKPTPEGDLE     | 13 | 1454.714 | sp P02754 LACB_BOVIN   | Beta-lactoglobulin | 59  | 71  | 214.26 | 23163000000 |
| ASDISLLDAQSAPLRVY | 17 | 1817.952 | sp P02754 LACB_BOVIN   | Beta-lactoglobulin | 42  | 58  | 202.44 | 25451000    |
| LVRTPEVDDE        | 10 | 1171.572 | sp P02754 LACB_BOVIN   | Beta-lactoglobulin | 138 | 147 | 199.89 | 23358000000 |
| ELKPTPEGDLE       | 11 | 1226.603 | sp P02754 LACB_BOVIN   | Beta-lactoglobulin | 61  | 71  | 190.88 | 20922000000 |
| KIIAEKTKIPAVF     | 13 | 1456.902 | sp P02754 LACB_BOVIN   | Beta-lactoglobulin | 86  | 98  | 190.53 | 3957700000  |

|                 |    |          |                                        |     |     |        |            |
|-----------------|----|----------|----------------------------------------|-----|-----|--------|------------|
| VEELKPTPEGDLEIL | 15 | 1680.882 | sp P02754 LACB_BOVINBeta-lactoglobulin | 59  | 73  | 184.24 | 3964000000 |
| HIRLSFNPTQLEEQ  | 14 | 1710.869 | sp P02754 LACB_BOVINBeta-lactoglobulin | 162 | 175 | 182.23 | 215930000  |
| ELKPTPEGDLEIL   | 13 | 1452.771 | sp P02754 LACB_BOVINBeta-lactoglobulin | 61  | 73  | 179.42 | 4469000000 |
| VEELKPTPEGDLEI  | 14 | 1567.798 | sp P02754 LACB_BOVINBeta-lactoglobulin | 59  | 72  | 174.42 | 353690000  |
| DAQSAPLRVY      | 10 | 1118.572 | sp P02754 LACB_BOVINBeta-lactoglobulin | 49  | 58  | 172.21 | 906680000  |
| KIDALNENKVLVL   | 13 | 1467.866 | sp P02754 LACB_BOVINBeta-lactoglobulin | 99  | 111 | 172    | 315190000  |
| VRTPEVDDE       | 9  | 1058.488 | sp P02754 LACB_BOVINBeta-lactoglobulin | 139 | 147 | 170.3  | 440060000  |
| DTDYKKYL        | 8  | 1044.513 | sp P02754 LACB_BOVINBeta-lactoglobulin | 112 | 119 | 166.05 | 1499300000 |
| LDTDYKKYL       | 9  | 1157.597 | sp P02754 LACB_BOVINBeta-lactoglobulin | 111 | 119 | 165.72 | 211320000  |
| LVRTPEVDDEALEK  | 14 | 1612.831 | sp P02754 LACB_BOVINBeta-lactoglobulin | 138 | 151 | 164.81 | 2058000000 |
| HIRLSFNPT       | 9  | 1083.583 | sp P02754 LACB_BOVINBeta-lactoglobulin | 162 | 170 | 163.9  | 623970000  |
| RTPEVDDE        | 8  | 959.4196 | sp P02754 LACB_BOVINBeta-lactoglobulin | 140 | 147 | 162.5  | 1457100000 |
| SAEPEQSL        | 8  | 859.3923 | sp P02754 LACB_BOVINBeta-lactoglobulin | 126 | 133 | 160.54 | 351910000  |
| LDTDYKKY        | 8  | 1044.513 | sp P02754 LACB_BOVINBeta-lactoglobulin | 111 | 118 | 156.4  | 524570000  |
| MENSAEPEQSL     | 11 | 1233.518 | sp P02754 LACB_BOVINBeta-lactoglobulin | 123 | 133 | 156.35 | 218670000  |
| IAEKTIPAVF      | 11 | 1215.723 | sp P02754 LACB_BOVINBeta-lactoglobulin | 88  | 98  | 154.85 | 758910000  |
| LSFNPTQLEE      | 10 | 1176.566 | sp P02754 LACB_BOVINBeta-lactoglobulin | 165 | 174 | 154.12 | 40151000   |
| EELKPTPEGDLEIL  | 14 | 1581.814 | sp P02754 LACB_BOVINBeta-lactoglobulin | 60  | 73  | 153.12 | 550240000  |
| ALEKFDKALKALPM  | 14 | 1573.89  | sp P02754 LACB_BOVINBeta-lactoglobulin | 148 | 161 | 151.79 | 44925000   |
| DTDYKKYLLF      | 10 | 1304.665 | sp P02754 LACB_BOVINBeta-lactoglobulin | 112 | 121 | 150.4  | 1158800000 |
| DTDYKKYLL       | 9  | 1157.597 | sp P02754 LACB_BOVINBeta-lactoglobulin | 112 | 120 | 150.05 | 868860000  |
| ELKPTPEGDLEI    | 12 | 1339.687 | sp P02754 LACB_BOVINBeta-lactoglobulin | 61  | 72  | 148.91 | 176590000  |
| KTKIPAVF        | 8  | 902.5589 | sp P02754 LACB_BOVINBeta-lactoglobulin | 91  | 98  | 147.52 | 5678500000 |
| VLDTDYKKY       | 9  | 1143.581 | sp P02754 LACB_BOVINBeta-lactoglobulin | 110 | 118 | 147.19 | 1057600000 |
| LSFNPTQL        | 8  | 918.4811 | sp P02754 LACB_BOVINBeta-lactoglobulin | 165 | 172 | 147.16 | 349150000  |

|                  |    |          |                                        |     |     |        |            |
|------------------|----|----------|----------------------------------------|-----|-----|--------|------------|
| ENSAEPEQSL       | 10 | 1102.478 | sp P02754 LACB_BOVINBeta-lactoglobulin | 124 | 133 | 140.84 | 781300000  |
| EKFDKALKALPM     | 12 | 1389.769 | sp P02754 LACB_BOVINBeta-lactoglobulin | 150 | 161 | 139.86 | 78434000   |
| VEELKPTPEGD      | 11 | 1212.587 | sp P02754 LACB_BOVINBeta-lactoglobulin | 59  | 69  | 139.38 | 424300000  |
| SDISLLDAQSAPLRVY | 16 | 1746.915 | sp P02754 LACB_BOVINBeta-lactoglobulin | 43  | 58  | 138.89 | 30570000   |
| IIAEKTKIPAVF     | 12 | 1328.807 | sp P02754 LACB_BOVINBeta-lactoglobulin | 87  | 98  | 138.22 | 3829800000 |
| LVRTPEVDDEALE    | 13 | 1484.736 | sp P02754 LACB_BOVINBeta-lactoglobulin | 138 | 150 | 138.22 | 2938700000 |
| EKTKIPAVF        | 9  | 1031.602 | sp P02754 LACB_BOVINBeta-lactoglobulin | 90  | 98  | 134.48 | 1374600000 |
| VRTPEVDDEALE     | 12 | 1371.652 | sp P02754 LACB_BOVINBeta-lactoglobulin | 139 | 150 | 132.88 | 6837700000 |
| LVRTPEVDDEAL     | 12 | 1355.693 | sp P02754 LACB_BOVINBeta-lactoglobulin | 138 | 149 | 130.66 | 8577400000 |
| LIVTQTMKGL       | 10 | 1102.642 | sp P02754 LACB_BOVINBeta-lactoglobulin | 17  | 26  | 128.69 | 1846500000 |
| NENKVLVL         | 8  | 927.5389 | sp P02754 LACB_BOVINBeta-lactoglobulin | 104 | 111 | 128.57 | 678800000  |
| DIQKVAGTWY       | 10 | 1179.592 | sp P02754 LACB_BOVINBeta-lactoglobulin | 27  | 36  | 128.38 | 519290000  |
| VRTPEVDDEALEK    | 13 | 1499.747 | sp P02754 LACB_BOVINBeta-lactoglobulin | 139 | 151 | 128.31 | 172450000  |
| AEKTKIPAVF       | 10 | 1102.639 | sp P02754 LACB_BOVINBeta-lactoglobulin | 89  | 98  | 126.31 | 757960000  |
| LDTDYKKYLL       | 10 | 1270.681 | sp P02754 LACB_BOVINBeta-lactoglobulin | 111 | 120 | 126.24 | 64465000   |
| AMAASDISLL       | 10 | 990.5056 | sp P02754 LACB_BOVINBeta-lactoglobulin | 39  | 48  | 124.37 | 711290000  |
| DIQKVAGTWYSL     | 12 | 1379.709 | sp P02754 LACB_BOVINBeta-lactoglobulin | 27  | 38  | 123.79 | 391880000  |
| AMAASDISLLDAQ    | 13 | 1304.628 | sp P02754 LACB_BOVINBeta-lactoglobulin | 39  | 51  | 122.94 | 443580000  |
| LVRTPEVDDEA      | 11 | 1242.609 | sp P02754 LACB_BOVINBeta-lactoglobulin | 138 | 148 | 120.45 | 163050000  |
| VLDTDYKKYLL      | 11 | 1369.749 | sp P02754 LACB_BOVINBeta-lactoglobulin | 110 | 120 | 118.71 | 3469300000 |
| NSAEPEQSLA       | 10 | 1044.472 | sp P02754 LACB_BOVINBeta-lactoglobulin | 125 | 134 | 118.5  | 246430000  |
| VEELKPTPEG       | 10 | 1097.561 | sp P02754 LACB_BOVINBeta-lactoglobulin | 59  | 68  | 117.89 | 56716000   |
| LKPTPEGDLEIL     | 12 | 1323.729 | sp P02754 LACB_BOVINBeta-lactoglobulin | 62  | 73  | 115.82 | 1389000000 |
| KKIIAEKTKIPAVF   | 14 | 1584.997 | sp P02754 LACB_BOVINBeta-lactoglobulin | 85  | 98  | 113.69 | 221610000  |
| LVLDTDYKKY       | 10 | 1256.665 | sp P02754 LACB_BOVINBeta-lactoglobulin | 109 | 118 | 113.22 | 871910000  |

|                    |    |          |                                        |     |     |        |             |
|--------------------|----|----------|----------------------------------------|-----|-----|--------|-------------|
| VEELKPTPEGDL       | 12 | 1325.672 | sp P02754 LACB_BOVINBeta-lactoglobulin | 59  | 70  | 111.86 | 37840000    |
| MENSAEPEQSLA       | 12 | 1304.555 | sp P02754 LACB_BOVINBeta-lactoglobulin | 123 | 134 | 110.47 | 53895000    |
| LSFNPTQLEEQ        | 11 | 1304.625 | sp P02754 LACB_BOVINBeta-lactoglobulin | 165 | 175 | 108.57 | 402370000   |
| HIRLSFNPTQLE       | 12 | 1453.768 | sp P02754 LACB_BOVINBeta-lactoglobulin | 162 | 173 | 105.98 | 33064000    |
| MAASDISLLDAQ       | 12 | 1233.591 | sp P02754 LACB_BOVINBeta-lactoglobulin | 40  | 51  | 103.87 | 180830000   |
| ALNENKVLVL         | 10 | 1111.66  | sp P02754 LACB_BOVINBeta-lactoglobulin | 102 | 111 | 102.62 | 340480000   |
| VRTPEVDDEAL        | 11 | 1242.609 | sp P02754 LACB_BOVINBeta-lactoglobulin | 139 | 149 | 102.61 | 2737600000  |
| KFDKALKALPM        | 11 | 1260.726 | sp P02754 LACB_BOVINBeta-lactoglobulin | 151 | 161 | 101.3  | 21253000000 |
| YVEELKPTPEGDLE     | 14 | 1617.777 | sp P02754 LACB_BOVINBeta-lactoglobulin | 58  | 71  | 100.69 | 33961000    |
| KFDKALKALPMHIR     | 14 | 1666.971 | sp P02754 LACB_BOVINBeta-lactoglobulin | 151 | 164 | 97.551 | 577520000   |
| IIAEKTKIPAVFK      | 13 | 1456.902 | sp P02754 LACB_BOVINBeta-lactoglobulin | 87  | 99  | 96.591 | 124600000   |
| KTKIPAVFK          | 9  | 1030.654 | sp P02754 LACB_BOVINBeta-lactoglobulin | 91  | 99  | 96.331 | 431210000   |
| KFDKALKALPMHIRL    | 15 | 1780.055 | sp P02754 LACB_BOVINBeta-lactoglobulin | 151 | 165 | 96.247 | 80161000    |
| KTKIPAVFKI         | 10 | 1143.738 | sp P02754 LACB_BOVINBeta-lactoglobulin | 91  | 100 | 96.171 | 109520000   |
| TDYKKYLL           | 8  | 1042.57  | sp P02754 LACB_BOVINBeta-lactoglobulin | 113 | 120 | 95.909 | 24069000    |
| LVRTPEVDDEALEKF    | 15 | 1759.899 | sp P02754 LACB_BOVINBeta-lactoglobulin | 138 | 152 | 95.428 | 90878000    |
| VDDEALEKF          | 9  | 1064.503 | sp P02754 LACB_BOVINBeta-lactoglobulin | 144 | 152 | 91.069 | 37907000    |
| KIDALNENKVL        | 11 | 1255.714 | sp P02754 LACB_BOVINBeta-lactoglobulin | 99  | 109 | 90.964 | 150070000   |
| IIAEKTKIPA         | 10 | 1082.67  | sp P02754 LACB_BOVINBeta-lactoglobulin | 87  | 96  | 89.886 | 233020000   |
| MENSAEPEQS         | 10 | 1120.434 | sp P02754 LACB_BOVINBeta-lactoglobulin | 123 | 132 | 88.921 | 41613000    |
| TDYKKYLLF          | 9  | 1189.638 | sp P02754 LACB_BOVINBeta-lactoglobulin | 113 | 121 | 88.819 | 49015000    |
| LVLDTDYKKYL        | 11 | 1369.749 | sp P02754 LACB_BOVINBeta-lactoglobulin | 109 | 119 | 87.789 | 119720000   |
| RVYVEELKPTPEGDLEIL | 18 | 2099.115 | sp P02754 LACB_BOVINBeta-lactoglobulin | 56  | 73  | 87.287 | 31074000    |
| KALPMHIRL          | 9  | 1077.648 | sp P02754 LACB_BOVINBeta-lactoglobulin | 157 | 165 | 85.67  | 159250000   |
| RTPEVDDEALEK       | 12 | 1400.678 | sp P02754 LACB_BOVINBeta-lactoglobulin | 140 | 151 | 79.886 | 75071000    |

|                      |    |          |                                        |     |     |        |            |
|----------------------|----|----------|----------------------------------------|-----|-----|--------|------------|
| LVLDTDYKKYLL         | 12 | 1482.833 | sp P02754 LACB_BOVINBeta-lactoglobulin | 109 | 120 | 79.82  | 33639000   |
| KALPMHIR             | 8  | 964.564  | sp P02754 LACB_BOVINBeta-lactoglobulin | 157 | 164 | 79.451 | 66324000   |
| RTPEVDDEALE          | 11 | 1272.583 | sp P02754 LACB_BOVINBeta-lactoglobulin | 140 | 150 | 78.098 | 1926400000 |
| VLDTDYKKYL           | 10 | 1256.665 | sp P02754 LACB_BOVINBeta-lactoglobulin | 110 | 119 | 76.465 | 4686500000 |
| MENSAEPE             | 8  | 905.3437 | sp P02754 LACB_BOVINBeta-lactoglobulin | 123 | 130 | 76.035 | 26446000   |
| LVRTPEVDDEALEKFDKALK | 20 | 2315.237 | sp P02754 LACB_BOVINBeta-lactoglobulin | 138 | 157 | 76.027 | 94104000   |
| IRLSFNPT             | 8  | 946.5236 | sp P02754 LACB_BOVINBeta-lactoglobulin | 163 | 170 | 74.929 | 186390000  |
| TMKGLDIQKVA          | 11 | 1202.669 | sp P02754 LACB_BOVINBeta-lactoglobulin | 22  | 32  | 74.611 | 34802000   |
| VRTPEVDDEALEKF       | 14 | 1646.815 | sp P02754 LACB_BOVINBeta-lactoglobulin | 139 | 152 | 74.257 | 49563000   |
| HIRLSFNPTQL          | 11 | 1324.725 | sp P02754 LACB_BOVINBeta-lactoglobulin | 162 | 172 | 73.067 | 31179000   |
| AEPEQSLA             | 8  | 843.3974 | sp P02754 LACB_BOVINBeta-lactoglobulin | 127 | 134 | 69.628 | 39624000   |
| LKPTPEGDLEI          | 11 | 1210.645 | sp P02754 LACB_BOVINBeta-lactoglobulin | 62  | 72  | 66.568 | 698440000  |
| NSAEPEQS             | 8  | 860.3512 | sp P02754 LACB_BOVINBeta-lactoglobulin | 125 | 132 | 66.457 | 123010000  |
| LVLDTDYK             | 8  | 965.507  | sp P02754 LACB_BOVINBeta-lactoglobulin | 109 | 116 | 66.073 | 37498000   |
| LIVTQTMK             | 8  | 932.5365 | sp P02754 LACB_BOVINBeta-lactoglobulin | 17  | 24  | 65.313 | 258570000  |
| VDDEALEK             | 8  | 917.4342 | sp P02754 LACB_BOVINBeta-lactoglobulin | 144 | 151 | 63.673 | 272050000  |
| VLVLDTDYK            | 9  | 1064.575 | sp P02754 LACB_BOVINBeta-lactoglobulin | 108 | 116 | 59.245 | 34399000   |
| ALPMHIRL             | 8  | 949.5531 | sp P02754 LACB_BOVINBeta-lactoglobulin | 158 | 165 | 57.281 | 63109000   |
| KIDALNENK            | 9  | 1043.561 | sp P02754 LACB_BOVINBeta-lactoglobulin | 99  | 107 | 55.064 | 102400000  |
| VRTPEVDD             | 8  | 929.4454 | sp P02754 LACB_BOVINBeta-lactoglobulin | 139 | 146 | 54.157 | 18918000   |
| KTKIPAVFKID          | 11 | 1258.765 | sp P02754 LACB_BOVINBeta-lactoglobulin | 91  | 101 | 54.005 | 608590000  |
| TPEVDDEALE           | 10 | 1116.482 | sp P02754 LACB_BOVINBeta-lactoglobulin | 141 | 150 | 53.878 | 82474000   |
| ENSAEPEQS            | 9  | 989.3938 | sp P02754 LACB_BOVINBeta-lactoglobulin | 124 | 132 | 51.193 | 75671000   |
| DKALKALPMH           | 10 | 1122.622 | sp P02754 LACB_BOVINBeta-lactoglobulin | 153 | 162 | 49.715 | 7340900    |
| KPTPEGDLEIL          | 11 | 1210.645 | sp P02754 LACB_BOVINBeta-lactoglobulin | 63  | 73  | 48.091 | 83590000   |

|              |    |          |                                        |    |     |        |          |
|--------------|----|----------|----------------------------------------|----|-----|--------|----------|
| KIDALNEN     | 8  | 915.4662 | sp P02754 LACB_BOVINBeta-lactoglobulin | 99 | 106 | 47.657 | 20415000 |
| EELKPTPEGDLE | 12 | 1355.646 | sp P02754 LACB_BOVINBeta-lactoglobulin | 60 | 71  | 46.462 | 41656000 |
| TKIPAVFK     | 8  | 902.5589 | sp P02754 LACB_BOVINBeta-lactoglobulin | 92 | 99  | 45.335 | 39026000 |



**Table S7:** Epitope peptides contained in the hydrolysate of ozonated whey protein.

| Sequence            | Length | Mass     | Leading razor protein                   | Start position | End position | Score  | Intensity  |
|---------------------|--------|----------|-----------------------------------------|----------------|--------------|--------|------------|
| KILDKVGINYWLAH      | 14     | 1668.935 | sp P00711 LALBA_BOVINAAlpha-lactalbumin | 113            | 126          | 277.28 | 221100000  |
| EVFRELKDLKGY        | 12     | 1495.804 | sp P00711 LALBA_BOVINAAlpha-lactalbumin | 26             | 37           | 210.93 | 718070000  |
| AIVQNNDSTEYGLFQ     | 15     | 1697.79  | sp P00711 LALBA_BOVINAAlpha-lactalbumin | 59             | 73           | 195.51 | 242390000  |
| VFRELKDLKGY         | 11     | 1366.761 | sp P00711 LALBA_BOVINAAlpha-lactalbumin | 27             | 37           | 150.08 | 2170500000 |
| GYDTQAIVQNNDSTE     | 15     | 1653.712 | sp P00711 LALBA_BOVINAAlpha-lactalbumin | 54             | 68           | 147.62 | 90402000   |
| GYDTQAIVQNNDSTEY    | 16     | 1816.775 | sp P00711 LALBA_BOVINAAlpha-lactalbumin | 54             | 69           | 143    | 81572000   |
| FRELKDLKGY          | 10     | 1267.693 | sp P00711 LALBA_BOVINAAlpha-lactalbumin | 28             | 37           | 131.83 | 25359000   |
| KILDKVGINYWLA       | 13     | 1531.876 | sp P00711 LALBA_BOVINAAlpha-lactalbumin | 113            | 125          | 131.43 | 32003000   |
| VFRELKDLKGYGGV      | 14     | 1579.872 | sp P00711 LALBA_BOVINAAlpha-lactalbumin | 27             | 40           | 115.82 | 28165000   |
| KKILDKVGIN          | 10     | 1126.707 | sp P00711 LALBA_BOVINAAlpha-lactalbumin | 112            | 121          | 111.61 | 329390000  |
| GYDTQAIVQN          | 10     | 1107.52  | sp P00711 LALBA_BOVINAAlpha-lactalbumin | 54             | 63           | 107.29 | 167620000  |
| VKILDKVGIN          | 11     | 1225.776 | sp P00711 LALBA_BOVINAAlpha-lactalbumin | 111            | 121          | 103.46 | 1115400000 |
| DKVGINYWLA          | 10     | 1177.613 | sp P00711 LALBA_BOVINAAlpha-lactalbumin | 116            | 125          | 98.033 | 42314000   |
| KILDKVGINYWLAHKA    | 16     | 1868.067 | sp P00711 LALBA_BOVINAAlpha-lactalbumin | 113            | 128          | 95.197 | 273720000  |
| GYDTQAIVQNNDSTEYGLF | 19     | 2133.949 | sp P00711 LALBA_BOVINAAlpha-lactalbumin | 54             | 72           | 94.767 | 11232000   |
| KILDKVGINYWLAHK     | 15     | 1797.03  | sp P00711 LALBA_BOVINAAlpha-lactalbumin | 113            | 127          | 76.82  | 1311500000 |
| ILDKVGINYW          | 10     | 1219.66  | sp P00711 LALBA_BOVINAAlpha-lactalbumin | 114            | 123          | 76.17  | 8616600    |
| DIMCVKKILDKVGIN     | 15     | 1687.937 | sp P00711 LALBA_BOVINAAlpha-lactalbumin | 107            | 121          | 48.284 | 52221000   |
| KDLKGYGGVSLPE       | 13     | 1361.719 | sp P00711 LALBA_BOVINAAlpha-lactalbumin | 32             | 44           | 42.19  | 15468000   |
| IMCVKKILDKVGIN      | 14     | 1572.91  | sp P00711 LALBA_BOVINAAlpha-lactalbumin | 108            | 121          | 41.704 | 43392000   |
| EQLTKCEVFREL        | 12     | 1493.755 | sp P00711 LALBA_BOVINAAlpha-lactalbumin | 20             | 31           | 37.144 | 12815000   |

|                 |    |          |                                        |     |     |        |             |
|-----------------|----|----------|----------------------------------------|-----|-----|--------|-------------|
| KKILDKVGINY     | 11 | 1289.771 | sp P00711 LALBA_BOVINAlpha-lactalbumin | 112 | 122 | 33.87  | 51044000    |
| DTDYKKY         | 7  | 931.4287 | sp P02754 LACB_BOVINBeta-lactoglobulin | 112 | 118 | 171.08 | 1234200000  |
| KIIAEKT         | 7  | 801.496  | sp P02754 LACB_BOVINBeta-lactoglobulin | 86  | 92  | 143.61 | 9643600     |
| TDYKKY          | 6  | 816.4018 | sp P02754 LACB_BOVINBeta-lactoglobulin | 113 | 118 | 130.84 | 265480000   |
| KIPAVF          | 6  | 673.4163 | sp P02754 LACB_BOVINBeta-lactoglobulin | 93  | 98  | 113.63 | 1437700000  |
| AEPEQSL         | 7  | 772.3603 | sp P02754 LACB_BOVINBeta-lactoglobulin | 127 | 133 | 107.74 | 81564000    |
| IIAEKT          | 6  | 673.401  | sp P02754 LACB_BOVINBeta-lactoglobulin | 87  | 92  | 107.65 | 1191600000  |
| TKIPAVF         | 7  | 774.464  | sp P02754 LACB_BOVINBeta-lactoglobulin | 92  | 98  | 105.2  | 1539100000  |
| GLDIQK          | 6  | 672.3806 | sp P02754 LACB_BOVINBeta-lactoglobulin | 25  | 30  | 87.582 | 12591000    |
| VLDTDYK         | 7  | 852.4229 | sp P02754 LACB_BOVINBeta-lactoglobulin | 110 | 116 | 86.866 | 891170000   |
| LDTDYK          | 6  | 753.3545 | sp P02754 LACB_BOVINBeta-lactoglobulin | 111 | 116 | 77.748 | 14123000    |
| LPMHIR          | 6  | 765.432  | sp P02754 LACB_BOVINBeta-lactoglobulin | 159 | 164 | 76.553 | 64419000    |
| TDYKKYL         | 7  | 929.4858 | sp P02754 LACB_BOVINBeta-lactoglobulin | 113 | 119 | 74.423 | 120620000   |
| VDDEALE         | 7  | 789.3392 | sp P02754 LACB_BOVINBeta-lactoglobulin | 144 | 150 | 68.485 | 38298000    |
| MHIRLS          | 6  | 755.4112 | sp P02754 LACB_BOVINBeta-lactoglobulin | 161 | 166 | 66.994 | 77573000    |
| ALPMHIR         | 7  | 836.4691 | sp P02754 LACB_BOVINBeta-lactoglobulin | 158 | 164 | 62.978 | 644380000   |
| IIAEKTK         | 7  | 801.496  | sp P02754 LACB_BOVINBeta-lactoglobulin | 87  | 93  | 54.205 | 8492900     |
| NSAEPEQSL       | 9  | 973.4353 | sp P02754 LACB_BOVINBeta-lactoglobulin | 125 | 133 | 256.48 | 3604800000  |
| VEELKPTPEGDLE   | 13 | 1454.714 | sp P02754 LACB_BOVINBeta-lactoglobulin | 59  | 71  | 214.26 | 28992000000 |
| LVRTPEVDDE      | 10 | 1171.572 | sp P02754 LACB_BOVINBeta-lactoglobulin | 138 | 147 | 199.89 | 9336600000  |
| ELKPTPEGDLE     | 11 | 1226.603 | sp P02754 LACB_BOVINBeta-lactoglobulin | 61  | 71  | 190.88 | 18158000000 |
| KIIAEKTKIPAVF   | 13 | 1456.902 | sp P02754 LACB_BOVINBeta-lactoglobulin | 86  | 98  | 190.53 | 1279000000  |
| VEELKPTPEGDLEIL | 15 | 1680.882 | sp P02754 LACB_BOVINBeta-lactoglobulin | 59  | 73  | 184.24 | 39632000000 |
| HIRLSFNPTQLEEQ  | 14 | 1710.869 | sp P02754 LACB_BOVINBeta-lactoglobulin | 162 | 175 | 182.23 | 70590000    |
| ELKPTPEGDLEIL   | 13 | 1452.771 | sp P02754 LACB_BOVINBeta-lactoglobulin | 61  | 73  | 179.42 | 35195000000 |

|                |    |          |                                        |     |     |        |             |
|----------------|----|----------|----------------------------------------|-----|-----|--------|-------------|
| VEELKPTPEGDLEI | 14 | 1567.798 | sp P02754 LACB_BOVINBeta-lactoglobulin | 59  | 72  | 174.42 | 204970000   |
| DAQSAPLRVY     | 10 | 1118.572 | sp P02754 LACB_BOVINBeta-lactoglobulin | 49  | 58  | 172.21 | 1084100000  |
| KIDALNENKVLVL  | 13 | 1467.866 | sp P02754 LACB_BOVINBeta-lactoglobulin | 99  | 111 | 172    | 441680000   |
| VRTPEVDDE      | 9  | 1058.488 | sp P02754 LACB_BOVINBeta-lactoglobulin | 139 | 147 | 170.3  | 1064900000  |
| LIVTQTMKGLDIQ  | 13 | 1458.812 | sp P02754 LACB_BOVINBeta-lactoglobulin | 17  | 29  | 168.22 | 605850000   |
| DTDYKKYL       | 8  | 1044.513 | sp P02754 LACB_BOVINBeta-lactoglobulin | 112 | 119 | 166.05 | 9390600000  |
| LDTDYKKYL      | 9  | 1157.597 | sp P02754 LACB_BOVINBeta-lactoglobulin | 111 | 119 | 165.72 | 131360000   |
| LVRTPEVDDEALEK | 14 | 1612.831 | sp P02754 LACB_BOVINBeta-lactoglobulin | 138 | 151 | 164.81 | 928670000   |
| HIRLSFNPT      | 9  | 1083.583 | sp P02754 LACB_BOVINBeta-lactoglobulin | 162 | 170 | 163.9  | 1677200000  |
| RTPEVDDE       | 8  | 959.4196 | sp P02754 LACB_BOVINBeta-lactoglobulin | 140 | 147 | 162.5  | 392240000   |
| SAEPEQSL       | 8  | 859.3923 | sp P02754 LACB_BOVINBeta-lactoglobulin | 126 | 133 | 160.54 | 198460000   |
| LDTDYKKY       | 8  | 1044.513 | sp P02754 LACB_BOVINBeta-lactoglobulin | 111 | 118 | 156.4  | 599820000   |
| MENSAEPEQSL    | 11 | 1233.518 | sp P02754 LACB_BOVINBeta-lactoglobulin | 123 | 133 | 156.35 | 80972000    |
| IAEKTIPAVF     | 11 | 1215.723 | sp P02754 LACB_BOVINBeta-lactoglobulin | 88  | 98  | 154.85 | 611420000   |
| LSFNPTQLEE     | 10 | 1176.566 | sp P02754 LACB_BOVINBeta-lactoglobulin | 165 | 174 | 154.12 | 62575000    |
| EELKPTPEGDLEIL | 14 | 1581.814 | sp P02754 LACB_BOVINBeta-lactoglobulin | 60  | 73  | 153.12 | 612050000   |
| ALEKFDKALKALPM | 14 | 1573.89  | sp P02754 LACB_BOVINBeta-lactoglobulin | 148 | 161 | 151.79 | 147500000   |
| DTDYKKYLLF     | 10 | 1304.665 | sp P02754 LACB_BOVINBeta-lactoglobulin | 112 | 121 | 150.4  | 10625000000 |
| DTDYKKYLL      | 9  | 1157.597 | sp P02754 LACB_BOVINBeta-lactoglobulin | 112 | 120 | 150.05 | 12135000000 |
| ELKPTPEGDLEI   | 12 | 1339.687 | sp P02754 LACB_BOVINBeta-lactoglobulin | 61  | 72  | 148.91 | 42689000    |
| KTKIPAVF       | 8  | 902.5589 | sp P02754 LACB_BOVINBeta-lactoglobulin | 91  | 98  | 147.52 | 20526000000 |
| VLDTDYKKY      | 9  | 1143.581 | sp P02754 LACB_BOVINBeta-lactoglobulin | 110 | 118 | 147.19 | 12584000000 |
| LSFNPTQL       | 8  | 918.4811 | sp P02754 LACB_BOVINBeta-lactoglobulin | 165 | 172 | 147.16 | 247790000   |
| ENSAEPEQSL     | 10 | 1102.478 | sp P02754 LACB_BOVINBeta-lactoglobulin | 124 | 133 | 140.84 | 502450000   |
| EKFDKALKALPM   | 12 | 1389.769 | sp P02754 LACB_BOVINBeta-lactoglobulin | 150 | 161 | 139.86 | 37830000    |

|                |    |          |                                        |     |     |        |             |
|----------------|----|----------|----------------------------------------|-----|-----|--------|-------------|
| VEELKPTPEGD    | 11 | 1212.587 | sp P02754 LACB_BOVINBeta-lactoglobulin | 59  | 69  | 139.38 | 523720000   |
| IIAEKTKIPAVF   | 12 | 1328.807 | sp P02754 LACB_BOVINBeta-lactoglobulin | 87  | 98  | 138.22 | 27651000000 |
| LVRTPEVDDEALE  | 13 | 1484.736 | sp P02754 LACB_BOVINBeta-lactoglobulin | 138 | 150 | 138.22 | 21526000000 |
| EKTKIPAVF      | 9  | 1031.602 | sp P02754 LACB_BOVINBeta-lactoglobulin | 90  | 98  | 134.48 | 14661000000 |
| VRTPEVDDEALE   | 12 | 1371.652 | sp P02754 LACB_BOVINBeta-lactoglobulin | 139 | 150 | 132.88 | 23079000000 |
| LVRTPEVDDEAL   | 12 | 1355.693 | sp P02754 LACB_BOVINBeta-lactoglobulin | 138 | 149 | 130.66 | 33400000000 |
| LIVTQTMKGL     | 10 | 1102.642 | sp P02754 LACB_BOVINBeta-lactoglobulin | 17  | 26  | 128.69 | 15509000000 |
| NENKVLVL       | 8  | 927.5389 | sp P02754 LACB_BOVINBeta-lactoglobulin | 104 | 111 | 128.57 | 8416000000  |
| DIQKVAGTWY     | 10 | 1179.592 | sp P02754 LACB_BOVINBeta-lactoglobulin | 27  | 36  | 128.38 | 9727600000  |
| AEKTKIPAVF     | 10 | 1102.639 | sp P02754 LACB_BOVINBeta-lactoglobulin | 89  | 98  | 126.31 | 6208900000  |
| AMAASDISLL     | 10 | 990.5056 | sp P02754 LACB_BOVINBeta-lactoglobulin | 39  | 48  | 124.37 | 3088200000  |
| DIQKVAGTWYSL   | 12 | 1379.709 | sp P02754 LACB_BOVINBeta-lactoglobulin | 27  | 38  | 123.79 | 1120500000  |
| AMAASDISLLDAQ  | 13 | 1304.628 | sp P02754 LACB_BOVINBeta-lactoglobulin | 39  | 51  | 122.94 | 3343700000  |
| LVRTPEVDDEA    | 11 | 1242.609 | sp P02754 LACB_BOVINBeta-lactoglobulin | 138 | 148 | 120.45 | 1115600000  |
| NSAEPEQSLA     | 10 | 1044.472 | sp P02754 LACB_BOVINBeta-lactoglobulin | 125 | 134 | 118.5  | 3041600000  |
| VEELKPTPEG     | 10 | 1097.561 | sp P02754 LACB_BOVINBeta-lactoglobulin | 59  | 68  | 117.89 | 500490000   |
| LKPTPEGDLEIL   | 12 | 1323.729 | sp P02754 LACB_BOVINBeta-lactoglobulin | 62  | 73  | 115.82 | 1536500000  |
| KKIIAEKTKIPAVF | 14 | 1584.997 | sp P02754 LACB_BOVINBeta-lactoglobulin | 85  | 98  | 113.69 | 2808800000  |
| LVLDTDYKKY     | 10 | 1256.665 | sp P02754 LACB_BOVINBeta-lactoglobulin | 109 | 118 | 113.22 | 5273000000  |
| VEELKPTPEGDL   | 12 | 1325.672 | sp P02754 LACB_BOVINBeta-lactoglobulin | 59  | 70  | 111.86 | 3107800000  |
| DAQSAPLRVYVE   | 12 | 1346.683 | sp P02754 LACB_BOVINBeta-lactoglobulin | 49  | 60  | 110.93 | 844590000   |
| ALEKFDKAL      | 9  | 1033.581 | sp P02754 LACB_BOVINBeta-lactoglobulin | 148 | 156 | 109.44 | 378700000   |
| LSFNPTQLEEQ    | 11 | 1304.625 | sp P02754 LACB_BOVINBeta-lactoglobulin | 165 | 175 | 108.57 | 4947800000  |
| MAASDISLLDAQ   | 12 | 1233.591 | sp P02754 LACB_BOVINBeta-lactoglobulin | 40  | 51  | 103.87 | 3066200000  |
| ALNENKVLVL     | 10 | 1111.66  | sp P02754 LACB_BOVINBeta-lactoglobulin | 102 | 111 | 102.62 | 4471300000  |

|                    |    |          |                                        |     |     |        |             |
|--------------------|----|----------|----------------------------------------|-----|-----|--------|-------------|
| VRTPEVDDEAL        | 11 | 1242.609 | sp P02754 LACB_BOVINBeta-lactoglobulin | 139 | 149 | 102.61 | 515180000   |
| KFDKALKALPM        | 11 | 1260.726 | sp P02754 LACB_BOVINBeta-lactoglobulin | 151 | 161 | 101.3  | 23072000000 |
| YVEELKPTPEGDLE     | 14 | 1617.777 | sp P02754 LACB_BOVINBeta-lactoglobulin | 58  | 71  | 100.69 | 23389000    |
| KFDKALKALPMHIR     | 14 | 1666.971 | sp P02754 LACB_BOVINBeta-lactoglobulin | 151 | 164 | 97.551 | 630060000   |
| IIAEKTKIPAVFK      | 13 | 1456.902 | sp P02754 LACB_BOVINBeta-lactoglobulin | 87  | 99  | 96.591 | 105530000   |
| KTKIPAVFK          | 9  | 1030.654 | sp P02754 LACB_BOVINBeta-lactoglobulin | 91  | 99  | 96.331 | 220830000   |
| KTKIPAVFKI         | 10 | 1143.738 | sp P02754 LACB_BOVINBeta-lactoglobulin | 91  | 100 | 96.171 | 74007000    |
| TDYKKYLL           | 8  | 1042.57  | sp P02754 LACB_BOVINBeta-lactoglobulin | 113 | 120 | 95.909 | 131300000   |
| LVRTPEVDDEALEKF    | 15 | 1759.899 | sp P02754 LACB_BOVINBeta-lactoglobulin | 138 | 152 | 95.428 | 165590000   |
| VDDEALEKF          | 9  | 1064.503 | sp P02754 LACB_BOVINBeta-lactoglobulin | 144 | 152 | 91.069 | 60384000    |
| KIDALNENKVL        | 11 | 1255.714 | sp P02754 LACB_BOVINBeta-lactoglobulin | 99  | 109 | 90.964 | 46155000    |
| IIAEKTKIPA         | 10 | 1082.67  | sp P02754 LACB_BOVINBeta-lactoglobulin | 87  | 96  | 89.886 | 245130000   |
| MENSAEPEQS         | 10 | 1120.434 | sp P02754 LACB_BOVINBeta-lactoglobulin | 123 | 132 | 88.921 | 6073700     |
| TDYKKYLLF          | 9  | 1189.638 | sp P02754 LACB_BOVINBeta-lactoglobulin | 113 | 121 | 88.819 | 98920000    |
| LVLDTDYKKYL        | 11 | 1369.749 | sp P02754 LACB_BOVINBeta-lactoglobulin | 109 | 119 | 87.789 | 94096000    |
| RVYVEELKPTPEGDLEIL | 18 | 2099.115 | sp P02754 LACB_BOVINBeta-lactoglobulin | 56  | 73  | 87.287 | 44283000    |
| KALPMHIRL          | 9  | 1077.648 | sp P02754 LACB_BOVINBeta-lactoglobulin | 157 | 165 | 85.67  | 68847000    |
| RTPEVDDEALEK       | 12 | 1400.678 | sp P02754 LACB_BOVINBeta-lactoglobulin | 140 | 151 | 79.886 | 20558000    |
| LVLDTDYKKYLL       | 12 | 1482.833 | sp P02754 LACB_BOVINBeta-lactoglobulin | 109 | 120 | 79.82  | 45685000    |
| KALPMHIR           | 8  | 964.564  | sp P02754 LACB_BOVINBeta-lactoglobulin | 157 | 164 | 79.451 | 41785000    |
| LVRTPEVDD          | 9  | 1042.53  | sp P02754 LACB_BOVINBeta-lactoglobulin | 138 | 146 | 78.334 | 46552000    |
| RTPEVDDEALE        | 11 | 1272.583 | sp P02754 LACB_BOVINBeta-lactoglobulin | 140 | 150 | 78.098 | 1708500000  |
| VLDTDYKKYL         | 10 | 1256.665 | sp P02754 LACB_BOVINBeta-lactoglobulin | 110 | 119 | 76.465 | 2751100000  |
| MENSAEPE           | 8  | 905.3437 | sp P02754 LACB_BOVINBeta-lactoglobulin | 123 | 130 | 76.035 | 4868200     |
| IRLSFNPT           | 8  | 946.5236 | sp P02754 LACB_BOVINBeta-lactoglobulin | 163 | 170 | 74.929 | 1181800000  |

|                           |    |          |                                        |     |     |        |            |
|---------------------------|----|----------|----------------------------------------|-----|-----|--------|------------|
| TMKGLDIQKVA               | 11 | 1202.669 | sp P02754 LACB_BOVINBeta-lactoglobulin | 22  | 32  | 74.611 | 24180000   |
| HIRLSFNPTQL               | 11 | 1324.725 | sp P02754 LACB_BOVINBeta-lactoglobulin | 162 | 172 | 73.067 | 53148000   |
| AEPEQSLA                  | 8  | 843.3974 | sp P02754 LACB_BOVINBeta-lactoglobulin | 127 | 134 | 69.628 | 10206000   |
| LKPTPEGDLEI               | 11 | 1210.645 | sp P02754 LACB_BOVINBeta-lactoglobulin | 62  | 72  | 66.568 | 421770000  |
| NSAEPEQS                  | 8  | 860.3512 | sp P02754 LACB_BOVINBeta-lactoglobulin | 125 | 132 | 66.457 | 28267000   |
| VEELKPTPEGDLEILLQKWENGECA | 25 | 2839.395 | sp P02754 LACB_BOVINBeta-lactoglobulin | 59  | 83  | 66.387 | 53169000   |
| LIVTQTMK                  | 8  | 932.5365 | sp P02754 LACB_BOVINBeta-lactoglobulin | 17  | 24  | 65.313 | 43958000   |
| VDDEALEK                  | 8  | 917.4342 | sp P02754 LACB_BOVINBeta-lactoglobulin | 144 | 151 | 63.673 | 237020000  |
| ALPMHIRL                  | 8  | 949.5531 | sp P02754 LACB_BOVINBeta-lactoglobulin | 158 | 165 | 57.281 | 123790000  |
| KIDALNENK                 | 9  | 1043.561 | sp P02754 LACB_BOVINBeta-lactoglobulin | 99  | 107 | 55.064 | 4888600    |
| VRTPEVDD                  | 8  | 929.4454 | sp P02754 LACB_BOVINBeta-lactoglobulin | 139 | 146 | 54.157 | 4015000    |
| EVDDEALE                  | 8  | 918.3818 | sp P02754 LACB_BOVINBeta-lactoglobulin | 143 | 150 | 54.056 | 17499000   |
| KTKIPAVFKID               | 11 | 1258.765 | sp P02754 LACB_BOVINBeta-lactoglobulin | 91  | 101 | 54.005 | 1131300000 |
| TPEVDDEALE                | 10 | 1116.482 | sp P02754 LACB_BOVINBeta-lactoglobulin | 141 | 150 | 53.878 | 63329000   |
| ENSAEPEQS                 | 9  | 989.3938 | sp P02754 LACB_BOVINBeta-lactoglobulin | 124 | 132 | 51.193 | 16462000   |
| KPTPEGDLEIL               | 11 | 1210.645 | sp P02754 LACB_BOVINBeta-lactoglobulin | 63  | 73  | 48.091 | 116020000  |
| KIDALNEN                  | 8  | 915.4662 | sp P02754 LACB_BOVINBeta-lactoglobulin | 99  | 106 | 47.657 | 64359000   |
| EELKPTPEGDLE              | 12 | 1355.646 | sp P02754 LACB_BOVINBeta-lactoglobulin | 60  | 71  | 46.462 | 51591000   |
| TKIPAVFK                  | 8  | 902.5589 | sp P02754 LACB_BOVINBeta-lactoglobulin | 92  | 99  | 45.335 | 38149000   |
| KPTPEGDLEILL              | 12 | 1323.729 | sp P02754 LACB_BOVINBeta-lactoglobulin | 63  | 74  | 45.137 | 42727000   |
